# Supplementary material for: [4 + 1]- and [4 + 2]-cycloadditions of a thiazole-2-thione-based 1,4-diphosphinine – broadening the scope
Source: Royal Society of Chemistry journal article supplement (doi:10.1039/d4dt02029d), 2024-01-01
Supplement: d4dt02029d1.pdf [file d4dt02029d1.pdf]

**Electronic Supporting Information**

**[4+1]- and [4+2]-cycloadditions of a thiazole-2-thione-based 1,4-diphosphinine – broadening the scope and creating perspectives**

Tim Kalisch,<sup>a</sup> Gregor Schnakenburg,<sup>a</sup> Georgii I. Nikonov<sup>b</sup> and Rainer Streubel<sup>\*a</sup>

<sup>a</sup>Institut für Anorganische Chemie der Rheinischen Friedrich-Wilhelms-Universität Bonn  
Gerhard-Domagk-Straße 1, 53121 Bonn (Germany)  
r.streubel@uni-bonn.de

<sup>b</sup>Department of Chemistry, Brock University  
1812 Sir Isaac Brock Way, St. Catharines, ON, L2S 3A1, Canada  
gnikonov@brocku.ca

## Content

|          |                                                                                                                                                                                                                                                        |           |
|----------|--------------------------------------------------------------------------------------------------------------------------------------------------------------------------------------------------------------------------------------------------------|-----------|
| <b>1</b> | <b>Experimental methods</b> .....                                                                                                                                                                                                                      | <b>4</b>  |
| <b>2</b> | <b>Experimental procedures and characterisation</b> .....                                                                                                                                                                                              | <b>5</b>  |
| 2.1      | spiro[1',2'-dihydro-1',3'-bis(2',6'-di- <i>i</i> -propylphenyl)-4',6'-dimethyl-1',3',2'-diazagallinine-2,9'-[3,7]-di- <i>n</i> -propyl-[3,7]-dihydro-[4,8]-gallano[1,4]diphosphinino[2,3-d:5,6-d']bis[1,3]thiazole-[2,6]-dithione] (2a).....           | 5         |
| 2.2      | Targeting spiro[1',2'-dihydro-1',3'-bis(2',6'-di- <i>i</i> -propylphenyl)-4',6'-dimethyl-1',3',2'-diazaluminine-2,9'-[3,7]-di- <i>n</i> -propyl-[3,7]-dihydro-[4,8]-alumano[1,4]diphosphinino[2,3-d:5,6-d']bis[1,3]thiazole-[2,6]-dithione] (2b) ..... | 6         |
| 2.3      | 9,10-bis(ethylcarboxy)-3,7-di- <i>n</i> -propyl-4,8-etheno[1,4]diphosphinino[2,3-d:5,6-d']bis[1,3]thiazole-2,6-dithione (3a) .....                                                                                                                     | 6         |
| 2.4      | 3,7-di- <i>n</i> -propyl-9-ethylcarboxy-4,8-etheno[1,4]diphosphinino[2,3-d:5,6-d']bis[1,3]thiazole-2,6-dithione (3b) .....                                                                                                                             | 7         |
| 2.5      | 9,10-diethyl-3,7-di- <i>n</i> -propyl-4,8-etheno[1,4]diphosphinino[2,3-d:5,6-d']bis[1,3]thiazole-2,6-dithione (3c) .....                                                                                                                               | 8         |
| 2.6      | <i>rel</i> -(9 <i>S</i> ,10 <i>R</i> )-9,10-bis(ethylcarboxy)-3,7-di- <i>n</i> -propyl-4,8-ethano[1,4]diphosphinino[2,3-d:5,6-d']bis[1,3]thiazole-2,6-dithione (4a) .....                                                                              | 9         |
| 2.7      | <i>rel</i> -(9 <i>R</i> ,10 <i>R</i> )-9,10-bis(ethylcarboxy)-3,7-di- <i>n</i> -propyl-4,8-ethano[1,4]diphosphinino[2,3-d:5,6-d']bis[1,3]thiazole-2,6-dithione (4a') .....                                                                             | 10        |
| 2.8      | 3,7-di- <i>n</i> -propyl-9-ethylcarboxy-4,8-ethano[1,4]diphosphinino[2,3-d:5,6-d']bis[1,3]thiazole-2,6-dithione (4b) .....                                                                                                                             | 11        |
| 2.9      | 3,7-di- <i>n</i> -propyl-9- <i>n</i> -butyl-4,8-ethano[1,4]diphosphinino[2,3-d:5,6-d']bis[1,3]thiazole-2,6-dithione (4c) .....                                                                                                                         | 12        |
| 2.10     | 3,7-di- <i>n</i> -propyl-4,8-ethano[1,4]diphosphinino[2,3-d:5,6-d']bis[1,3]thiazole-2,6-dithione (4d)<br>13                                                                                                                                            |           |
| 2.11     | <i>rel</i> -(9 <i>S</i> ,10 <i>R</i> )-3,7-di- <i>n</i> -propyl-4,8-[1',2']-cyclohexano[1,4]diphosphinino[2,3-d:5,6-d']bis[1,3]thiazole-2,6-dithione (4e) .....                                                                                        | 14        |
| 2.12     | 9,9-diethyl-3,7-di- <i>n</i> -propyl-4,8-ethano[1,4]diphosphinino[2,3-d:5,6-d']bis[1,3]thiazole-2,6-dithione (4f) .....                                                                                                                                | 15        |
| <b>3</b> | <b>NMR spectra</b> .....                                                                                                                                                                                                                               | <b>17</b> |
| 3.1      | 2a .....                                                                                                                                                                                                                                               | 17        |
| 3.2      | 2b .....                                                                                                                                                                                                                                               | 19        |
| 3.3      | 3a .....                                                                                                                                                                                                                                               | 20        |
| 3.4      | 3b .....                                                                                                                                                                                                                                               | 22        |
| 3.5      | 3c.....                                                                                                                                                                                                                                                | 24        |
| 3.6      | 4a .....                                                                                                                                                                                                                                               | 26        |
| 3.7      | 4a' .....                                                                                                                                                                                                                                              | 28        |
| 3.8      | 4b .....                                                                                                                                                                                                                                               | 30        |
| 3.9      | 4c.....                                                                                                                                                                                                                                                | 32        |
| 3.10     | 4d .....                                                                                                                                                                                                                                               | 35        |

|          |                                                 |           |
|----------|-------------------------------------------------|-----------|
| 3.11     | 4e                                              | 37        |
| 3.12     | 4f                                              | 39        |
| <b>4</b> | <b>Singel crystal X-ray diffraction studies</b> | <b>41</b> |
| 4.1      | 3c                                              | 41        |
| 4.2      | 4f                                              | 43        |
| <b>5</b> | <b>Computational details</b>                    | <b>46</b> |
| 5.1      | Theoretical methods                             | 46        |
| 5.2      | Additional tables/figures                       | 46        |
| 5.3      | Coordinates                                     | 47        |
| 5.3.1    | <b>1<sup>Me</sup></b>                           | 47        |
| 5.3.2    | <b>2a<sup>Me</sup></b>                          | 48        |
| 5.3.3    | <b>2b<sup>Me</sup></b>                          | 49        |
| 5.3.4    | <b>3a<sup>Me</sup></b>                          | 50        |
| 5.3.5    | <b>3b<sup>Me</sup></b>                          | 51        |
| 5.3.6    | <b>3c<sup>Me</sup></b>                          | 51        |
| 5.3.7    | <b>3d<sup>Me</sup></b>                          | 52        |
| 5.3.8    | <b>4a<sup>Me</sup></b>                          | 53        |
| 5.3.9    | <b>4a<sup>Me</sup></b>                          | 54        |
| 5.3.10   | <b>4b<sup>Me</sup></b>                          | 56        |
| 5.3.11   | <b>4c<sup>Me</sup></b>                          | 57        |
| 5.3.12   | <b>4d<sup>Me</sup></b>                          | 59        |
| 5.3.13   | <b>4e<sup>Me</sup></b>                          | 59        |
| 5.3.14   | <b>4f<sup>Me</sup></b>                          | 60        |

## 1 Experimental methods

If not specified, all reactions were performed in a dried and deoxygenated argon atmosphere using Schlenk or glovebox techniques. The used argon (>99.998%) was purified by a system of three columns (deoxygenation by a BTS copper catalyst (BASF PuriStar® R3-155) at ca. 100 °C, drying with silica gel, phosphorus pentoxide desiccant with indicator (Sicapent®) and calcium chloride). Glassware, spatulas, cannulas and filter papers were dried in a compartment drier at 110 °C for at least 1 h. Additionally, glassware was heated with a heat gun (up to 550 °C) under active vacuum (10<sup>-2</sup> mbar) and kept under vacuum for 5–10 min. Sterile syringes were purged with argon three times before use. The used solvents were dried using standard procedures<sup>145</sup> by refluxing over proper desiccants (*n*-pentane, petroleum ether 40/65 and toluene over sodium wire (Ø = 2 mm); diethyl ether stabilized with 3,5-di-tert-butyl-4-hydroxytoluene (BHT) and tetrahydrofuran over benzophenone and sodium wire; dichloromethane over calcium hydride) in an argon atmosphere for several days and distilled before use. Alternatively, diethyl ether and toluene were dried using a Mbraun SPS-800 solvent purification system. For filtration Schlenk frits or stainless steel cannulas (Ø = 1–2 mm) with Whatman® glass microfiber filters (grade GF/B) were used. After use, stainless steel cannulas were cleaned with diluted hydrochloric acid, water and acetone, while glassware was stored in a concentrated solution of potassium hydroxide in *i*-propanol for at least 2 d (only overnight for glass frits) and in diluted hydrochloric acid for at least several hours. Afterwards, the glassware was washed with demineralised water and acetone. All glass joints were greased with either OKS 1112 grease or PTFE paste (Carl Roth).

NMR spectra were recorded on a Bruker Avance I 300 MHz, Bruker Avance I 400 MHz, Bruker Avance I 500 MHz, Bruker Avance III HD Ascend 500 MHz or a Bruker Avance III HD Ascend 700 MHz spectrometer at the NMR department of the University of Bonn and subsequently analysed using the program Mestrenova 14.2 by *Mestrelab Research S.L.* Obtained <sup>1</sup>H and <sup>13</sup>C{<sup>1</sup>H} NMR spectra were calibrated using the residual proton/carbon signal of the used deuterated solvents relative to tetramethylsilane<sup>146</sup> (residual peaks given in ppm, C<sub>6</sub>D<sub>6</sub>: δ(<sup>1</sup>H) = 7.160, δ(<sup>13</sup>C) = 128.060, CDCl<sub>3</sub>: δ(<sup>1</sup>H) = 7.260, δ(<sup>13</sup>C) = 77.160, CD<sub>2</sub>Cl<sub>2</sub>: δ(<sup>1</sup>H) = 5.320, δ(<sup>13</sup>C) = 53.840, THF-*d*8: δ(<sup>1</sup>H) = 1.730/3.580, δ(<sup>13</sup>C) = 25.370/67.570, toluene-*d*8: δ(<sup>1</sup>H) = 2.090, δ(<sup>13</sup>C) = 20.400). For heteronuclear NMR spectra the IUPAC recommended method was used, which specifies the chemical shift δ of a compound as

$$\delta = 10^6 \cdot \frac{\nu_{\text{sample}} - \nu_{\text{reference}}}{\nu_{\text{reference}}}$$

in which  $\nu_{\text{sample}}$  denotes the frequency of the respective nucleus relative to the frequency of <sup>1</sup>H. Deuterated solvents were stored over 10w% molecular sieve (3 Å) for at least 2 d before use. All chemical shifts δ are given in parts per million (ppm) and scalar coupling constants <sup>n</sup>J<sub>X,Y</sub> in Hertz (Hz), with *n* being the number of covalent bonds between the nuclei X and Y. The multiplicity of a given signal is described as follows: s = singlet, d = doublet, t = triplet, q = quartet, quint = quintet, sext = sextet, hept = heptet, m = multiplet and combinations of these. Broad signals were denoted with “br.”. In <sup>1</sup>H NMR data, the number of nuclei in a respective signal is given according to integration. Complex NMR spectra were analysed by a combination of 1D and 2D NMR experiments (*i.e.*, COSY, HSQC, HMBC). All NMR measurements were carried out at 298 K if not stated otherwise.

All samples were measured by the analytical department of the University of Bonn. Electron impact ionisation (EI) experiments were performed on a Thermo Finnigan MAT 95 XL sector field instrument using an ionisation energy of 70 eV, calibration and referencing were done using perfluorokerosene (PKF). Electrospray injection (ESI) and atmospheric pressure chemical ionisation (APCI) measurements were done on a Thermo Fisher Scientific Orbitrap XL spectrometer using acetonitrile or dichloromethane as solvents. Air sensitive samples were submitted in sealed glass vials after

preparation in a glovebox and only opened shortly before measuring. For all samples, selected data is given, reducing isotopic patterns to the mass-to-charge ratio ( $m/z$ ) of the isotopomer with the highest relative abundance, which is given in parentheses. As high-resolution mass spectra (HRMS) using ESI or APCI were recorded in a single measurement, no standard deviations were obtained.

ATR-IR spectra of solids were recorded inside a glovebox at ambient temperature in a spectral range from 400–4000  $\text{cm}^{-1}$  using a Bruker Alpha FTIR spectrometer with a single-reflection ATR unit (Platinum-ATR Diamond) or a Shimadzu IRSpirit FTIR spectrometer with a single-reflection ATR unit (QATR-S). Apodisation was done using the Happ-Genzel function. The data sets were analysed with the software *EZ Omnic 7.3* from *Fisher Scientific* and *LabSolutions IR 2.26* from *Shimadzu*. Peak intensities are given as very strong (vs), strong (s), medium (m) or weak (w). Only selected peaks at wave numbers  $>1500 \text{ cm}^{-1}$  are given.

## 2 Experimental procedures and characterisation

### 2.1 spiro[1',2'-dihydro-1',3'-bis(2',6'-di-*i*-propylphenyl)-4',6'-dimethyl-1',3',2'-diazagallanine-2,9'-[3,7]-di-*n*-propyl-[3,7]-dihydro-[4,8]-gallano[1,4]diphosphinino[2,3-d:5,6-d']bis[1,3]thiazole-[2,6]-dithione] (2a)

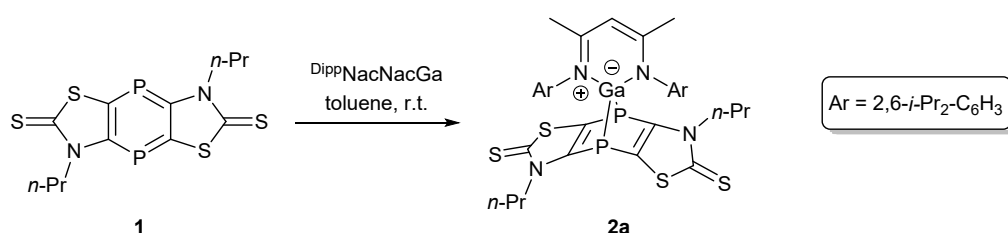

In a 10 mL vial a suspension of 51.3 mg (0.136 mmol, 1.00 eq.) **1** in 2 mL of toluene was added to a solution of 73.6 mg (0.151 mmol, 1.11 eq.) DiPPNacNacGa in 1 mL toluene. The mixture was stirred at ambient temperature for 20 h. The resulting suspension was decanted and the obtained solution was evaporated *in vacuo* ( $10^{-2}$  mbar) before addition of diethyl ether. The suspension was cooled to  $-30 \text{ }^\circ\text{C}$  and decanted again. The solid residues were combined and dried *in vacuo* to give **7a** as an off-white powder.

**Molecular formula:** C<sub>41</sub>H<sub>55</sub>GaN<sub>4</sub>P<sub>2</sub>S<sub>4</sub>

**Molecular weight:** 863.83 g/mol

**Yield:** 70 mg (0.081 mmol, 60%)

**MS** (EI, 70 eV, selected data):  $m/z$  (%): 928.2 [M+3O+H<sub>2</sub>O]<sup>+</sup>, 910.1 [M+3O]<sup>+</sup>, 880.2 [M+H<sub>2</sub>O]<sup>+</sup>, 862.2 [M]<sup>+</sup>, 486.1 [C<sub>29</sub>H<sub>41</sub>GaN<sub>2</sub>]<sup>+</sup>, 375.9 [M-C<sub>29</sub>H<sub>41</sub>GaN<sub>2</sub>]<sup>+</sup>, 333.8 [M-C<sub>29</sub>H<sub>41</sub>GaN<sub>2</sub>-C<sub>3</sub>H<sub>7</sub>+H]<sup>+</sup>, 291.9 [M-C<sub>29</sub>H<sub>41</sub>GaN<sub>2</sub>-2 C<sub>3</sub>H<sub>7</sub>+2 H]<sup>+</sup>.

**HRMS** (ESI) for C<sub>41</sub>H<sub>56</sub>GaN<sub>4</sub>P<sub>2</sub>S<sub>4</sub>O<sub>3</sub> theor./exp. 911.1961/911.1964 [M+3O+H]<sup>+</sup>.  
for C<sub>41</sub>H<sub>56</sub>GaN<sub>4</sub>P<sub>2</sub>S<sub>4</sub> theor./exp. 863.211/863.206 [M+H]<sup>+</sup>.

**IR** (ATR Diamond, selected data):  $\tilde{\nu} / \text{cm}^{-1} = 2867$  (w,  $\nu(\text{CH})$ ), 2929 (m,  $\nu(\text{CH})$ ), 2959 (w,  $\nu(\text{CH})$ ).

**<sup>1</sup>H NMR** (600.2 MHz, 298.1 K, C<sub>6</sub>D<sub>6</sub>):  $\delta / \text{ppm} = 0.58$  (t, 6H, <sup>3</sup>J<sub>H,H</sub> = 7.39 Hz, CH<sub>2</sub>CH<sub>2</sub>CH<sub>3</sub>), 0.87 (d, 6H, <sup>3</sup>J<sub>H,H</sub> = 6.80 Hz, Ar-CH-CH<sub>3</sub>), 0.88 (d, 6H, <sup>3</sup>J<sub>H,H</sub> = 6.82 Hz, Ar-CH-CH<sub>3</sub>), 1.40 (d, 6H, <sup>3</sup>J<sub>H,H</sub> = 6.83 Hz, Ar-CH-CH<sub>3</sub>), 1.47 (d, 6H, <sup>3</sup>J<sub>H,H</sub> = 6.92 Hz, Ar-CH-CH<sub>3</sub>), 1.48 (s, 6H, N-C-CH<sub>3</sub>), 1.53–1.69 (m, 4H, CH<sub>2</sub>CH<sub>2</sub>CH<sub>3</sub>), 2.84 (hept, 2H, <sup>3</sup>J<sub>H,H</sub> = 6.81 Hz, Ar-CH-CH<sub>3</sub>), 2.98 (hept, 2H, <sup>3</sup>J<sub>H,H</sub> = 6.81 Hz, Ar-CH-CH<sub>3</sub>), 3.82–3.89 (m, 2H,

$\text{CH}_2\text{CH}_2\text{CH}_3$ ), 4.62–4.69 (m, 2H,  $\text{CH}_2\text{CH}_2\text{CH}_3$ ), 4.77 (1H, s, N-C-CH), 6.95 (4H, dm,  $^3J_{\text{H,H}} = 7.77$  Hz, *m*-Dipp), 7.37 (2H, t,  $^3J_{\text{H,H}} = 7.77$  Hz, *p*-Dipp).

$^{13}\text{C}\{^1\text{H}\}$  NMR (150.9 MHz, 298.4 K,  $\text{C}_6\text{D}_6$ ):  $\delta$  / ppm = 11.3 (s,  $\text{CH}_2\text{CH}_2\text{CH}_3$ ), 20.8 (s,  $\text{CH}_2\text{CH}_2\text{CH}_3$ ), 23.8 (s, Ar-CHCH<sub>3</sub>), 24.3 (s, Ar-CHCH<sub>3</sub>), 24.3 (s, Ar-CHCH<sub>3</sub>), 24.4 (s, Ar-CHCH<sub>3</sub>), 24.4 (s, Ar-CHCH<sub>3</sub>), 25.2 (s, N-C-CH<sub>3</sub>), 25.6 (s, N-C-CH<sub>3</sub>), 28.9 (s, Ar-CH-CH<sub>3</sub>), 29.1 (s, Ar-CH-CH<sub>3</sub>), 53.4 (dd,  $^3J_{\text{P,C}} = 4.16$  Hz,  $^4J_{\text{P,C}} = 4.16$  Hz,  $\text{CH}_2\text{CH}_2\text{CH}_3$ ), 96.5 (s, N-C-CH), 125.1 (s, *m*-Ar), 126.0 (s, *m*-Ar), 128.2 (s, *p*-Ar), 132.7–133.5 (s, PCS), 140.1 (s, *i*-Ar), 141.3 (s, *o*-Ar), 142.0 (s, *o*-Ar), 160.3–160.8 (m, PCN), 170.4 (s, N-C-CH<sub>3</sub>), 190.8 (s, C=S).

$^{31}\text{P}\{^1\text{H}\}$  NMR (243.0 MHz, 298.0 K,  $\text{C}_6\text{D}_6$ ):  $\delta$  / ppm = -81.7 (s).

$^{31}\text{P}$  NMR (243.0 MHz, 298.0 K,  $\text{C}_6\text{D}_6$ ):  $\delta$  / ppm = -81.7 (s).

## 2.2 Targeting spiro[1',2'-dihydro-1',3'-bis(2',6'-di-*i*-propylphenyl)-4',6'-dimethyl-1',3',2'-diazaluminumine-2,9'-[3,7]-di-*n*-propyl-[3,7]-dihydro-[4,8]-alumano[1,4]diphosphinino[2,3-d:5,6-d']bis[1,3]thiazole-2,6]-dithione] (2b)

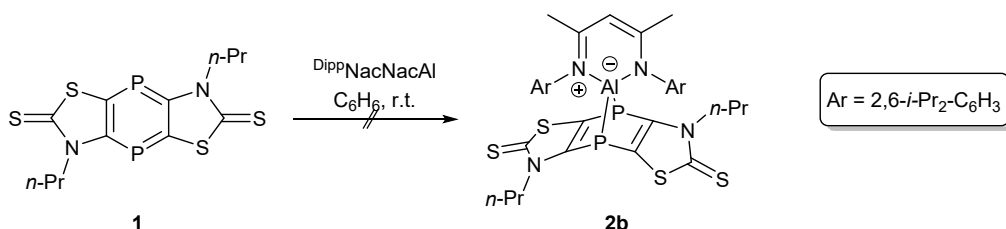

In a 10 mL vial a solution of 7.7 mg (0.017 mmol, 0.99 eq.) of  $\text{Dip}^{\text{PPNacNacAl}}$  in 0.5 ml benzene was added dropwise to a suspension of 6.6 mg (0.018, 1.00 eq.) of **1** in 0.5 mL benzene. An immediate colour change from red to dark brown was observed. The reaction was stirred for 3.5 h before the addition of 8.5 mg (0.019 mmol, 1.09 eq.) of  $\text{Dip}^{\text{PPNacNacAl}}$  to the reaction mixture. After stirring for a further 19 h 5.5 mg (0.012 mmol, 0.71 eq.) of  $\text{Dip}^{\text{PPNacNacAl}}$  were added.

$^{31}\text{P}\{^1\text{H}\}$  NMR (243.0 MHz, 299.1 K,  $\text{C}_6\text{D}_6$ ):  $\delta$  / ppm = -108.4 (d,  $^3J_{\text{P,P}} = 22.3$  Hz, ), -100.6 (s), -88.2 (d,  $^3J_{\text{P,P}} = 22.3$  Hz).

$^{31}\text{P}$  NMR (243.0 MHz, 298.0 K,  $\text{C}_6\text{D}_6$ ):  $\delta$  / ppm = -108.5 (dd,  $^3J_{\text{P,P}} = 20.8$  Hz,  $^1J_{\text{P,H}} = 6.25$  Hz), -100.6 (s), -88.1 (d,  $^3J_{\text{P,P}} = 20.8$  Hz).

## 2.3 9,10-bis(ethylcarboxy)-3,7-di-*n*-propyl-4,8-etheno[1,4]diphosphinino[2,3-d:5,6-d']bis[1,3]thiazole-2,6]-dithione (3a)

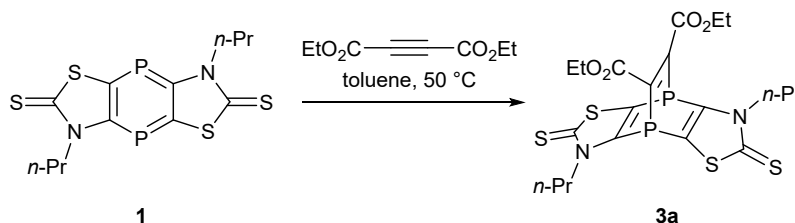

In a 20 mL Schlenk vessel, 0.07 mL (0.436 mmol, 1.17 eq.) of diethyl acetylene dicarboxylate were added to a suspension of 140 mg (0.371 mmol, 1.00 eq.) of **1** in 6 mL toluene. The mixture was heated to 50 °C and stirred at this temperature for 6.5 h before removing volatiles *in vacuo* ( $10^{-2}$  mbar). The residue was washed three times with 4 mL *n*-pentane each before drying *in vacuo* ( $10^{-2}$  mbar). The product was obtained as an orange solid.

**Molecular formula:** C<sub>20</sub>H<sub>24</sub>N<sub>2</sub>O<sub>4</sub>P<sub>2</sub>S<sub>4</sub>

**Molecular weight:** 546.61 g/mol

**Yield:** 147.1 mg (0.269 mmol, 72%)

**Melting point:** 81 °C (dec. to **1**)

**Elemental analysis:**

|                |         |        |        |
|----------------|---------|--------|--------|
| calculated / % | C 43.95 | H 4.43 | N 5.13 |
| found / %      | C 42.20 | H 4.81 | N 4.31 |

**MS** (pos. ESI, selected data): m/z (%): 515.044 (100) [M-2O+H]<sup>+</sup>.

(neg. ESI, selected data): m/z (%): 579.3 (100) [M+O+OH]<sup>-</sup>.

**IR** (ATR Diamond, selected data):  $\tilde{\nu}$  / cm<sup>-1</sup> = 1719 (s,  $\nu$ (CO)), 2872 (w,  $\nu$ (CH)), 2935 (w,  $\nu$ (CH)), 2966 (w,  $\nu$ (CH)).

**<sup>1</sup>H NMR** (500.0 MHz, 298.0 K, CDCl<sub>3</sub>):  $\delta$  / ppm = 1.00 (t, 6H, <sup>3</sup>J<sub>H,H</sub> = 7.38 Hz, CH<sub>2</sub>CH<sub>2</sub>CH<sub>3</sub>), 1.33 (t, 6H, <sup>3</sup>J<sub>H,H</sub> = 7.15 Hz, OCH<sub>2</sub>CH<sub>3</sub>), 1.76–1.89 (m, 4H, CH<sub>2</sub>CH<sub>2</sub>CH<sub>3</sub>), 4.26–4.38 (m, 6H, OCH<sub>2</sub>CH<sub>3</sub>, CH<sub>2</sub>CH<sub>2</sub>CH<sub>3</sub>), 4.43–4.53 (m, 2H, CH<sub>2</sub>CH<sub>2</sub>CH<sub>3</sub>).

**<sup>13</sup>C{<sup>1</sup>H} NMR** (125.8 MHz, 298.0 K, CDCl<sub>3</sub>):  $\delta$  / ppm = 11.3 (s, CH<sub>2</sub>CH<sub>2</sub>CH<sub>3</sub>), 14.1 (s, OCH<sub>2</sub>CH<sub>3</sub>), 22.5 (d, <sup>4</sup>J<sub>P,C</sub> = 1.82 Hz, CH<sub>2</sub>CH<sub>2</sub>CH<sub>3</sub>), 51.8 (dd, <sup>3</sup>J<sub>P,C</sub> = 4.84 Hz, <sup>4</sup>J<sub>P,C</sub> = 4.84 Hz, CH<sub>2</sub>CH<sub>2</sub>CH<sub>3</sub>), 63.2 (s, OCH<sub>2</sub>CH<sub>3</sub>), 131.4–132.0 (m, PCS), 157.4–157.9 (m, PCCO<sub>2</sub>Et), 159.7–160.0 (m, PCN), 164.7–165.4 (m, CCO<sub>2</sub>Et), 189.6 (s, C=S).

**<sup>31</sup>P{<sup>1</sup>H} NMR** (202.4 MHz, 298.0 K, CDCl<sub>3</sub>):  $\delta$  / ppm = -75.5 (s).

**<sup>31</sup>P NMR** (202.4 MHz, 298.0 K, CDCl<sub>3</sub>):  $\delta$  / ppm = -75.5 (s).

## 2.4 3,7-di-*n*-propyl-9-ethylcarboxy-4,8-etheno[1,4]diphosphino[2,3-d:5,6-d']bis[1,3]thiazole-2,6-dithione (**3b**)

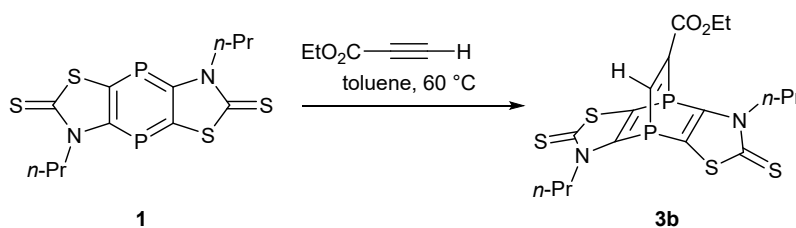

In a 20 mL Schlenk vessel, 292 mg (0.775 mmol, 1.00 eq.) **1** were dissolved in 12 mL toluene. After addition of 0.40 mL (3.95 mmol, 5.09 eq.) of ethyl propiolate the reaction mixture was stirred at 60 °C for 1.5 h. Volatiles were removed *in vacuo* (10<sup>-2</sup> mbar) at 50 °C and the dark orange residue was washed three times with 5 mL of *n*-pentane and three times with 5 mL of diethyl ether before drying the residue *in vacuo* (10<sup>-2</sup> mbar). The product was obtained as an orange solid.

**Molecular formula:** C<sub>17</sub>H<sub>20</sub>N<sub>2</sub>O<sub>2</sub>P<sub>2</sub>S<sub>4</sub>

**Molecular weight:** 474.55 g/mol

**Yield:** 257 mg (0.542 mmol, 70%)

**Melting point:** 113 °C (dec. to **1**)

**MS** (pos. ESI, selected data): m/z (%): 474.995 (100) [M+H]<sup>+</sup>.

**IR** (ATR Diamond, selected data):  $\tilde{\nu}$  /  $\text{cm}^{-1}$  = 1702 (s,  $\nu(\text{CO})$ ), 2870 (w,  $\nu(\text{CH})$ ), 2928 (w,  $\nu(\text{CH})$ ), 2958 (w,  $\nu(\text{CH})$ ).

**$^1\text{H}$  NMR** (500.1 MHz, 298.0 K,  $\text{CDCl}_3$ ):  $\delta$  / ppm = 0.99 (t, 3H,  $^3J_{\text{H,H}} = 7.44$  Hz,  $\text{CH}_2\text{CH}_2\text{CH}_3$ ), 0.99 (t, 3H,  $^3J_{\text{H,H}} = 7.44$  Hz,  $\text{CH}_2\text{CH}_2\text{CH}_3$ ), 1.36 (t, 3H,  $^3J_{\text{H,H}} = 7.13$  Hz,  $\text{OCH}_2\text{CH}_3$ ), 1.74–1.86 (m, 4H,  $\text{CH}_2\text{CH}_2\text{CH}_3$ ), 4.29–4.41 (m, 4H,  $\text{CH}_2\text{CH}_2\text{CH}_3$ ), 4.41–4.51 (m, 2H,  $\text{OCH}_2\text{CH}_3$ ), 8.74 (dd, 1H,  $^2J_{\text{P,H}} = 61.6$  Hz,  $^3J_{\text{P,H}} = 6.77$  Hz, CH).

**$^{13}\text{C}\{^1\text{H}\}$  NMR** (125.8 MHz, 298.0 K,  $\text{CDCl}_3$ ):  $\delta$  / ppm = 11.2 (d,  $^5J_{\text{P,C}} = 1.66$  Hz,  $\text{CH}_2\text{CH}_2\text{CH}_3$ ), 11.3 (d,  $^5J_{\text{P,C}} = 1.66$  Hz,  $\text{CH}_2\text{CH}_2\text{CH}_3$ ), 14.2 (s,  $\text{OCH}_2\text{CH}_3$ ), 22.4 (d,  $^4J_{\text{P,C}} = 3.56$  Hz,  $\text{CH}_2\text{CH}_2\text{CH}_3$ ), 22.5 (d,  $^4J_{\text{P,C}} = 3.40$  Hz,  $\text{CH}_2\text{CH}_2\text{CH}_3$ ), 51.4 (d,  $^3J_{\text{P,C}} = 9.92$  Hz,  $\text{CH}_2\text{CH}_2\text{CH}_3$ ), 62.8 (d,  $^4J_{\text{P,C}} = 1.50$  Hz,  $\text{OCH}_2\text{CH}_3$ ), 131.7 (dd,  $^1J_{\text{P,C}} = 26.0$  Hz,  $^2J_{\text{P,C}} = 4.80$  Hz, PCS), 133.3 (dd,  $^1J_{\text{P,C}} = 28.2$  Hz,  $^2J_{\text{P,C}} = 5.51$  Hz, PCS), 157.8 (dd,  $^1J_{\text{P,C}} = 12.8$  Hz,  $^2J_{\text{P,C}} = 5.13$  Hz, PCN), 158.6 (dd,  $^1J_{\text{P,C}} = 24.0$  Hz,  $^2J_{\text{P,C}} = 4.27$  Hz, PCH), 159.5 (dd,  $^1J_{\text{P,C}} = 15.9$  Hz,  $^2J_{\text{P,C}} = 2.00$  Hz, PCN), 161.4 (dd,  $^2J_{\text{P,C}} = 3.58$  Hz,  $^3J_{\text{P,C}} = 19.6$  Hz,  $\text{CCO}_2\text{Et}$ ), 163.9 (dd,  $^1J_{\text{P,C}} = 34.0$  Hz,  $^2J_{\text{P,C}} = 3.71$  Hz,  $\text{CCO}_2\text{Et}$ ), 189.0 (d,  $^3J_{\text{P,C}} = 2.12$  Hz,  $\text{NSC}=\text{S}$ ), 189.1 (d,  $^3J_{\text{P,C}} = 1.95$  Hz,  $\text{NSC}=\text{S}$ ).

**$^{31}\text{P}\{^1\text{H}\}$  NMR** (202.5 MHz, 298.0 K,  $\text{CDCl}_3$ ):  $\delta$  / ppm = -87.1 (d,  $^3J_{\text{P,P}} = 25.97$  Hz), -84.0 (d,  $^3J_{\text{P,P}} = 25.97$  Hz).

**$^{31}\text{P}$  NMR** (202.5 MHz, 298.0 K,  $\text{CDCl}_3$ ):  $\delta$  / ppm = -87.1 (dd,  $^3J_{\text{P,P}} = 25.9$  Hz,  $^3J_{\text{P,H}} = 6.71$  Hz), -84.0 (dd,  $^3J_{\text{P,P}} = 25.9$  Hz,  $^2J_{\text{P,H}} = 61.6$  Hz).

## 2.5 9,10-diethyl-3,7-di-*n*-propyl-4,8-etheno[1,4]diphosphinino[2,3-d:5,6-d']bis[1,3]thiazole-2,6-dithione (3c)

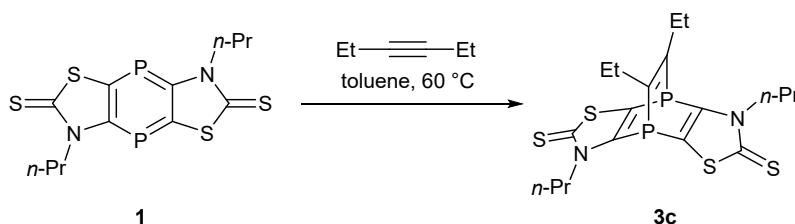

In a 10 mL Schlenk vessel, 0.05 mL (0.440 mmol, 5.5 eq.) 3-hexyne were added to a suspension of 30 mg (0.080 mmol, 1.00 eq.) of **1** in 2 mL toluene. The mixture was stirred at 60 °C for 22 d before removal of volatiles *in vacuo* ( $10^{-2}$  mbar). The residue was washed three times with 2 mL of *n*-pentane each. After drying *in vacuo* ( $10^{-2}$  mbar), the product was obtained as a yellow solid.

**Molecular formula:**  $\text{C}_{18}\text{H}_{24}\text{N}_2\text{P}_2\text{S}_4$

**Molecular weight:** 458.60 g/mol

**Yield:** 16.2 mg (0.035 mmol, 57%)

**Melting point:** 190 °C (dec. to **1**)

**MS** (EI, 70 eV, selected data):  $m/z$  (%): 458.0 (100)  $[\text{M}]^{+\bullet}$ , 375.9  $[\text{M}-\text{C}_6\text{H}_{10}]^{+\bullet}$ , 291.8  $[\text{M}-\text{C}_6\text{H}_{10}-2\text{C}_3\text{H}_7+2\text{H}]^{+\bullet}$ .

**HRMS** (pos. ESI) for  $\text{C}_{18}\text{H}_{24}\text{N}_2\text{P}_2\text{S}_4$  theor./exp. 458.0298/458.0296  $[\text{M}]^{+\bullet}$ .

**IR** (ATR Diamond, selected data):  $\tilde{\nu}$  /  $\text{cm}^{-1}$  = 2869 (w,  $\nu(\text{CH})$ ), 2933 (m,  $\nu(\text{CH})$ ), 2963 (w,  $\nu(\text{CH})$ ).

**$^1\text{H}$  NMR** (500.0 MHz, 298.0 K,  $\text{CDCl}_3$ ):  $\delta$  / ppm = 1.00 (t, 6H,  $^3J_{\text{H,H}} = 7.40$  Hz,  $\text{CH}_2\text{CH}_2\text{CH}_3$ ), 1.08 (t, 6H,  $^3J_{\text{H,H}} = 7.44$  Hz,  $\text{CCH}_2\text{CH}_3$ ), 1.73–1.90 (m, 4H,  $\text{CH}_2\text{CH}_2\text{CH}_2$ ), 2.43–2.60 (m, 4H,  $\text{CCH}_2\text{CH}_3$ ), 4.31–4.38 (m, 2H,  $\text{CH}_2\text{CH}_2\text{CH}_3$ ) 4.40–4.47 (m, 2H,  $\text{CH}_2\text{CH}_2\text{CH}_3$ ).



**$^{13}\text{C}\{^1\text{H}\}$  NMR** (125.8 MHz, 298.0 K,  $\text{CDCl}_3$ ):  $\delta$  / ppm = 11.3 (s,  $\text{CH}_2\text{CH}_2\text{CH}_3$ ), 13.6 (s,  $\text{CCH}_2\text{CH}_3$ ), 22.4 (dd,  $^4J_{\text{P,C}} = 1.67$  Hz,  $^4J_{\text{P,C}} = 1.67$  Hz,  $\text{CH}_2\text{CH}_2\text{CH}_3$ ) 28.1 (m,  $\text{CCH}_2\text{CH}_3$ ) 31.1 (d,  $^4J_{\text{P,C}} = 15.4$  Hz,  $\text{CH}_2\text{CH}_2\text{CH}_2\text{CH}_3$ ), 51.6 (dd,  $^3J_{\text{P,C}} = 4.79$  Hz,  $^4J_{\text{P,C}} = 4.79$  Hz,  $\text{CH}_2\text{CH}_2\text{CH}_3$ ), 133.7 (dd,  $^1J_{\text{P,C}} = 18.2$  Hz,  $^2J_{\text{P,C}} = 13.8$  Hz, PCS), 156.8 (dd,  $^1J_{\text{P,C}} = 9.49$  Hz,  $^2J_{\text{P,C}} = 8.51$  Hz,  $\text{PCCH}_2\text{CH}_3$ ), 160.8 (dd,  $^1J_{\text{P,C}} = 12.6$  Hz,  $^2J_{\text{P,C}} = 9.08$  Hz, PCN), 189.3 (s,  $\text{C}=\text{S}$ ).

**$^{31}\text{P}\{^1\text{H}\}$  NMR** (202.4 MHz, 298.0 K,  $\text{CDCl}_3$ ):  $\delta$  / ppm = -71.2 (s).

**$^{31}\text{P}$  NMR** (202.4 MHz, 298.0 K,  $\text{CDCl}_3$ ):  $\delta$  / ppm = -71.2 (m).

2.6 *rel*-(9*S*,10*R*)-9,10-bis(ethylcarboxy)-3,7-di-*n*-propyl-4,8-ethano[1,4]diphosphinino[2,3-*d*:5,6-*d'*]bis[1,3]thiazole-2,6-dithione (**4a**)

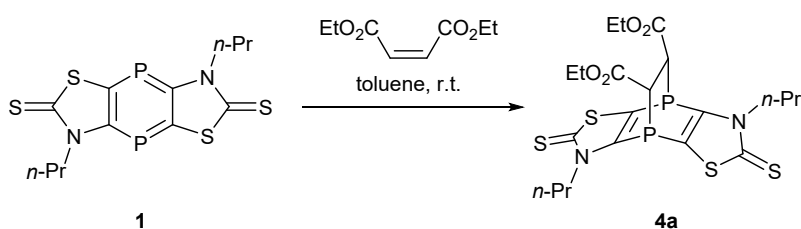

In a 10 mL Schlenk vessel, 0.09 mL (0.724 mmol, 5.07 eq.) diethyl maleate were added to a suspension of 53.8 g (0.143 mmol, 1.00 eq.) of **1** in 4 mL toluene. The mixture was stirred for 4 h at ambient temperature and volatiles were removed *in vacuo* ( $10^{-2}$  mbar). The residue was washed three times with 1.5 mL of *n*-pentane each and dried *in vacuo* ( $10^{-2}$  mbar). The product was obtained as a colourless solid.

**Molecular formula:**  $\text{C}_{20}\text{H}_{26}\text{N}_2\text{O}_4\text{P}_2\text{S}_4$

**Molecular weight:** 548.63 g/mol

**Yield:** 49.4 mg (0.090 mmol, 63%)

**Melting point:** 140 °C (dec. to **1**)

|                            |                |         |        |        |         |
|----------------------------|----------------|---------|--------|--------|---------|
| <b>Elemental analysis:</b> | calculated / % | C 43.79 | H 4.78 | N 5.11 | S 23.37 |
|                            | found / %      | C 43.45 | H 4.74 | N 5.00 | S 23.30 |

**MS** (pos. ESI, selected data):  $m/z$  (%): 549.032 (68)  $[\text{M}+\text{H}]^+$ , 219.187 (100)  $[\text{M}-\text{C}_8\text{H}_{12}\text{O}_4-2\text{C}_3\text{H}_7+2\text{H}]^+$ .

**IR** (ATR Diamond, selected data):  $\tilde{\nu}$  /  $\text{cm}^{-1}$  = 1724 (s,  $\nu(\text{CO})$ ), 2871 (w,  $\nu(\text{CH})$ ), 2932 (w,  $\nu(\text{CH})$ ), 2959 (w,  $\nu(\text{CH})$ ).

**$^1\text{H}$  NMR** (300.1 MHz, 298.0 K,  $\text{CDCl}_3$ ):  $\delta$  / ppm = 1.01 (t, 3H,  $^3J_{\text{H,H}} = 7.37$  Hz,  $\text{CH}_2\text{CH}_2\text{CH}_3$ ), 1.02 (t, 3H,  $^3J_{\text{H,H}} = 7.39$  Hz,  $\text{CH}_2\text{CH}_2\text{CH}_3$ ), 1.20 (t, 3H,  $^3J_{\text{H,H}} = 7.16$  Hz,  $\text{OCH}_2\text{CH}_3$ ), 1.22 (t, 3H,  $^3J_{\text{H,H}} = 7.16$  Hz,  $\text{OCH}_2\text{CH}_3$ ), 1.74–1.92 (m, 4H,  $\text{CH}_2\text{CH}_2\text{CH}_3$ ), 3.37 (ddd,  $^2J_{\text{P,H}} = 2.54$  Hz,  $^3J_{\text{P,H}} = 6.32$  Hz,  $^3J_{\text{H,H}} = 9.38$  Hz, PCH), 3.47 (ddd,  $^2J_{\text{P,H}} = 3.08$  Hz,  $^3J_{\text{P,H}} = 6.49$  Hz,  $^3J_{\text{H,H}} = 9.62$  Hz, PCH), 3.99–4.14 (m, 4H,  $\text{OCH}_2\text{CH}_3$ ), 4.22–4.32 (m, 1H,  $\text{CH}_2\text{CH}_2\text{CH}_3$ ), 4.34–4.42 (m, 2H,  $\text{CH}_2\text{CH}_2\text{CH}_3$ ), 4.49–4.57 (m, 1H,  $\text{CH}_2\text{CH}_2\text{CH}_3$ ).

**$^{13}\text{C}\{^1\text{H}\}$  NMR** (125.8 MHz, 298.0 K,  $\text{CDCl}_3$ ):  $\delta$  / ppm = 11.3 (d,  $^5J_{\text{P,C}} = 1.16$  Hz,  $\text{CH}_2\text{CH}_2\text{CH}_3$ ), 11.3 (d,  $^5J_{\text{P,C}} = 0.87$  Hz,  $\text{CH}_2\text{CH}_2\text{CH}_3$ ), 14.1 (s,  $\text{OCH}_2\text{CH}_3$ ), 14.2 (s,  $\text{OCH}_2\text{CH}_3$ ), 22.1 (d,  $^4J_{\text{P,C}} = 3.22$  Hz,  $\text{CH}_2\text{CH}_2\text{CH}_3$ ), 22.5 (d,  $^4J_{\text{P,C}} = 3.49$  Hz,  $\text{CH}_2\text{CH}_2\text{CH}_3$ ), 44.3 (dd,  $^1J_{\text{P,C}} = 18.4$  Hz,  $^2J_{\text{P,C}} = 1.99$  Hz, PCH), 45.2 dd,  $^1J_{\text{P,C}} = 15.8$  Hz,  $^2J_{\text{P,C}} = 1.84$  Hz, PCH), 51.1 (d,  $^3J_{\text{P,C}} = 10.1$  Hz,  $\text{CH}_2\text{CH}_2\text{CH}_3$ ), 51.3 (d,  $^3J_{\text{P,C}} = 10.7$  Hz,  $\text{CH}_2\text{CH}_2\text{CH}_3$ ), 62.8 (d,  $^4J_{\text{P,C}} = 1.23$  Hz,  $\text{OCH}_2\text{CH}_3$ ), 62.9 (s,  $\text{OCH}_2\text{CH}_3$ ), 127.0 (dd,  $^1J_{\text{P,C}} = 26.0$  Hz,  $^2J_{\text{P,C}} = 4.63$  Hz, PCS), 128.5 ( $^1J_{\text{P,C}} = 23.4$  Hz,  $^2J_{\text{P,C}} = 4.32$  Hz, PCS), 152.0 ( $^1J_{\text{P,C}} = 18.6$  Hz,  $^2J_{\text{P,C}} = 2.46$  Hz, PCN), 152.6 ( $^1J_{\text{P,C}} = 16.4$  Hz,

$^2J_{P,C} = 1.92$  Hz, PCN), 168.6 (d,  $^2J_{P,C} = 9.04$  Hz, CCO<sub>2</sub>Et), 169.4 (d,  $^2J_{P,C} = 10.6$  Hz, CCO<sub>2</sub>Et), 190.4 (s, C=S), 190.8 (d,  $^3J_{P,C} = 2.29$  Hz, C=S).

$^{31}\text{P}\{^1\text{H}\}$  NMR (202.5 MHz, 298.0 K, CDCl<sub>3</sub>):  $\delta$  / ppm = -75.8 (d,  $^3J_{P,P} = 28.8$  Hz), -73.3 (d,  $^3J_{P,P} = 28.8$  Hz).

$^{31}\text{P}$  NMR (202.5 MHz, 298.0 K, CDCl<sub>3</sub>):  $\delta$  / ppm = -75.8 (ddd,  $^3J_{P,P} = 28.8$  Hz,  $^2J_{P,H} = 2.53$  Hz,  $^3J_{P,H} = 6.06$  Hz), -73.3 (dm  $^3J_{P,P} = 25.4$  Hz).

2.7 *rel*-(9*R*,10*R*)-9,10-bis(ethylcarboxy)-3,7-di-*n*-propyl-4,8-ethano[1,4]diphosphinino[2,3-*d*:5,6-*d'*]bis[1,3]thiazole-2,6-dithione (**4a'**)

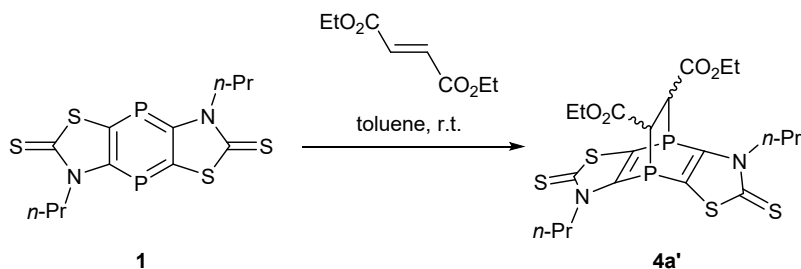

In a 25 mL Schlenk vessel, 0.3 mL (1.83 mmol, 4.40 eq.) of diethyl fumarate were added to a suspension of 157 mg (0.417 mmol, 1.00 eq.) of **1** in 12 mL toluene. The mixture was stirred for 23 h and volatiles were removed *in vacuo* ( $10^{-2}$  mbar). The residue was washed three times with 4 mL of *n*-pentane each and dried *in vacuo* ( $10^{-2}$  mbar). The product was obtained as a colourless solid.

**Molecular formula:** C<sub>20</sub>H<sub>26</sub>N<sub>2</sub>O<sub>4</sub>P<sub>2</sub>S<sub>4</sub>

**Molecular weight:** 548.63 g/mol

**Yield:** 154 mg (0.281 mmol, 67%)

**Melting point:** 118 °C (dec. to **1**)

|                            |                |         |        |        |         |
|----------------------------|----------------|---------|--------|--------|---------|
| <b>Elemental analysis:</b> | calculated / % | C 43.79 | H 4.78 | N 5.11 | S 23.37 |
|                            | found / %      | C 43.71 | H 4.74 | N 5.02 | S 23.33 |

**MS** (pos. ESI, selected data): *m/z* (%): 549.032 [M+H]<sup>+</sup>, 517.060 [M-2 CH<sub>3</sub>-H]<sup>+</sup>.

**IR** (ATR Diamond, selected data):  $\tilde{\nu}$  / cm<sup>-1</sup> = 1714 (s,  $\nu(\text{CO})$ ), 2904 (w,  $\nu(\text{CH})$ ), 2941 (w,  $\nu(\text{CH})$ ), 2974 (w,  $\nu(\text{CH})$ ).

$^1\text{H}$  NMR (500.0 MHz, 298.0 K, CDCl<sub>3</sub>):  $\delta$  / ppm = 0.99 (t, 6H,  $^3J_{H,H} = 7.41$  Hz, CH<sub>2</sub>CH<sub>2</sub>CH<sub>3</sub>), 1.03 (t, 6H,  $^3J_{H,H} = 7.42$  Hz, CH<sub>2</sub>CH<sub>2</sub>CH<sub>3</sub> isomer), 1.26 (t, 6H,  $^3J_{H,H} = 7.15$  Hz, OCH<sub>2</sub>CH<sub>3</sub>), 1.28 (t, 6H,  $^3J_{H,H} = 7.15$  Hz, OCH<sub>2</sub>CH<sub>3</sub> isomer), 1.65–1.88 (m, 4+4H, CH<sub>2</sub>CH<sub>2</sub>CH<sub>3</sub>, CH<sub>2</sub>CH<sub>2</sub>CH<sub>3</sub> isomer), 3.61 (d,  $^2J_{P,H} = 2.20$  Hz, PCH), 3.82 (d,  $^2J_{P,H} = 2.86$  Hz, PCH isomer), 4.09–4.20 (m, 4+4H, OCH<sub>2</sub>CH<sub>3</sub>, OCH<sub>2</sub>CH<sub>3</sub> isomer), 4.20–4.28 (m, 2H, CH<sub>2</sub>CH<sub>2</sub>CH<sub>3</sub>, CH<sub>2</sub>CH<sub>2</sub>CH<sub>3</sub> isomer), 4.34–4.51 (m, 6H, CH<sub>2</sub>CH<sub>2</sub>CH<sub>3</sub>, CH<sub>2</sub>CH<sub>2</sub>CH<sub>3</sub> isomer).

$^{13}\text{C}\{^1\text{H}\}$  NMR (125.8 MHz, 298.0 K, CDCl<sub>3</sub>):  $\delta$  / ppm = 11.2 (s, CH<sub>2</sub>CH<sub>2</sub>CH<sub>3</sub> isomer), 11.2 (s, CH<sub>2</sub>CH<sub>2</sub>CH<sub>3</sub>), 14.2 (s, OCH<sub>2</sub>CH<sub>3</sub>), 14.4 (s, OCH<sub>2</sub>CH<sub>3</sub> isomer), 22.2 (dd,  $^4J_{P,C} = 1.63$  Hz,  $^5J_{P,C} = 1.63$  Hz, CH<sub>2</sub>CH<sub>2</sub>CH<sub>3</sub>), 22.4 (dd,  $^4J_{P,C} = 1.78$  Hz,  $^5J_{P,C} = 1.78$  Hz, CH<sub>2</sub>CH<sub>2</sub>CH<sub>3</sub> isomer), 43.9 (dd,  $^1J_{P,C} = 11.8$  Hz,  $^2J_{P,C} = 9.74$  Hz, PCH isomer), 45.2 (dd,  $^1J_{P,C} = 11.4$  Hz,  $^2J_{P,C} = 8.97$  Hz, PCH), 51.1 (d,  $^3J_{P,C} = 8.96$  Hz, CH<sub>2</sub>CH<sub>2</sub>CH<sub>3</sub>), 51.1 (d,  $^3J_{P,C} = 9.27$  Hz, CH<sub>2</sub>CH<sub>2</sub>CH<sub>3</sub> isomer), 63.1 (s, OCH<sub>2</sub>CH<sub>3</sub>), 63.2 (s, OCH<sub>2</sub>CH<sub>3</sub> isomer), 127.6 (dd,  $^1J_{P,C} = 13.5$  Hz,  $^2J_{P,C} = 1.22$  Hz, PCS isomer), 127.7 (d,  $^1J_{P,C} = 13.7$  Hz, PCS), 152.1 (dd,  $^1J_{P,C} = 12.4$  Hz,  $^2J_{P,C} = 9.29$  Hz, PCN), 152.4 (dd,  $^1J_{P,C} = 12.4$  Hz,  $^2J_{P,C} = 9.66$  Hz, PCN isomer), 169.1 (dd,  $^2J_{P,C} = 3.91$  Hz,

$^3J_{P,C} = 3.91$  Hz, *CCO<sub>2</sub>Et isomer*), 170.0 (dd,  $^2J_{P,C} = 4.71$  Hz,  $^3J_{P,C} = 4.71$  Hz, *CCO<sub>2</sub>Et*), 190.5 (s, *C=S isomer*), 190.6 (d,  $^3J_{P,C} = 2.29$  Hz, *C=S*).

$^{31}\text{P}\{^1\text{H}\}$  NMR (202.5 MHz, 298.0 K,  $\text{CDCl}_3$ ):  $\delta$  / ppm = -72.5 (s), -72.3 (s, *isomer*).

$^{31}\text{P}$  NMR (202.5 MHz, 298.0 K,  $\text{CDCl}_3$ ):  $\delta$  / ppm = -72.5 (br. s), -72.3 (m, *isomer*); isomeric ratio 53:47.

## 2.8 3,7-di-*n*-propyl-9-ethylcarboxy-4,8-ethano[1,4]diphosphinino[2,3-d:5,6-d']bis[1,3]thiazole-2,6-dithione (4b)

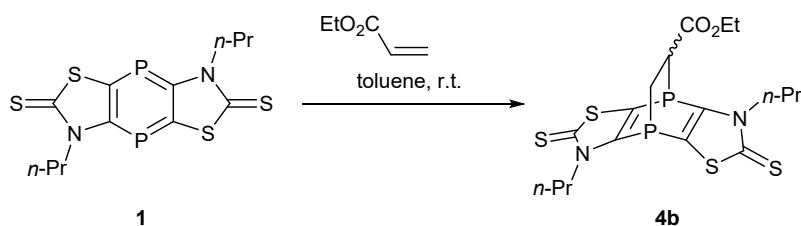

In a 20 mL Schlenk vessel, 0.1 mL (0.939 mmol, 2.99 eq.) of ethyl acrylate were added to a suspension of 118.1 mg (0.314 mmol, 1.00 eq.) of **1** in 6 mL toluene. The mixture was stirred for 30 min at ambient temperature and volatiles were removed *in vacuo* ( $10^{-2}$  mbar) before washing the off-white residue three times with 1 mL of diethyl ether and three times with 2 mL of *n*-pentane each. After drying *in vacuo* ( $10^{-2}$  mbar) the product was obtained as a pale-yellow solid.

**Molecular formula:**  $\text{C}_{17}\text{H}_{22}\text{N}_2\text{O}_2\text{P}_2\text{S}_4$

**Molecular weight:** 476.56 g/mol

**Yield:** 57.2 mg (0.120 mmol, 38%)

**Melting point:** 79 °C

**Elemental analysis:**

|  | calculated / % | C 42.85 | H 4.65 | N 5.88 | S 26.91 |
|--|----------------|---------|--------|--------|---------|
|  | found / %      | C 39.54 | H 4.95 | N 5.33 | S 24.53 |

**MS** (pos. ESI, selected data):  $m/z$  (%): 461.034 (25)  $[\text{M}-\text{CH}_3]^+$ , 445.039 (100)  $[\text{M}-\text{S}+\text{H}]^+$ , 344.986 (45)  $[\text{M}-\text{CO}_2\text{Et}-2\text{C}_2\text{H}_5]^+$ .

**HRMS** (pos. ESI) for  $\text{C}_{17}\text{H}_{22}\text{N}_2\text{O}_2\text{P}_2\text{S}_4\text{H}$  theor./exp. 477.0112/477.0112  $[\text{M}+\text{H}]^+$ .

**IR** (ATR Diamond, selected data):  $\tilde{\nu}$  /  $\text{cm}^{-1}$  = 1725 (m,  $\nu(\text{CO})$ ), 2870 (w,  $\nu(\text{CH})$ ), 2934 (w,  $\nu(\text{CH})$ ), 2962 (w,  $\nu(\text{CH})$ ).

$^1\text{H}$  NMR (500.0 MHz, 298.0 K,  $\text{CDCl}_3$ ):  $\delta$  / ppm = 0.96–1.03 (m, 6H,  $\text{CH}_2\text{CH}_2\text{CH}_3$ ), 1.17–1.32 (m, 3H,  $\text{CO}_2\text{CH}_2\text{CH}_3$ ), 1.63–1.87 (m, 4H,  $\text{CH}_2\text{CH}_2\text{CH}_3$ ), 2.05–2.35 (m, 2H,  $\text{PCH}_2$ ), 3.13–3.21 (m, 1H,  $\text{PCHCO}_2\text{Et}$ ), 4.07–4.28 (m, 2H,  $\text{CO}_2\text{CH}_2\text{CH}_3$ ), 4.30–4.49 (m, 4H,  $\text{CH}_2\text{CH}_2\text{CH}_3$ ).

$^{13}\text{C}\{^1\text{H}\}$  NMR (125.73 MHz, 298.0 K,  $\text{CDCl}_3$ ):  $\delta$  / ppm = 11.1 (d,  $^5J_{P,C} = 1.45$  Hz  $\text{CH}_2\text{CH}_2\text{CH}_3$  isomer), 11.2 (m,  $\text{CH}_2\text{CH}_2\text{CH}_3$ ), 14.2 (s,  $\text{CO}_2\text{CH}_2\text{CH}_3$  isomer), 14.4 (s,  $\text{CO}_2\text{CH}_2\text{CH}_3$ ), 22.1 (d,  $^4J_{P,C} = 3.53$  Hz,  $\text{CH}_2\text{CH}_2\text{CH}_3$  isomer), 22.3 (d,  $^4J_{P,C} = 3.52$  Hz,  $\text{CH}_2\text{CH}_2\text{CH}_3$ ), 22.4 (d,  $^4J_{P,C} = 3.53$  Hz,  $\text{CH}_2\text{CH}_2\text{CH}_3$  isomer), 22.4 (d,  $^4J_{P,C} = 3.53$  Hz,  $\text{CH}_2\text{CH}_2\text{CH}_3$ ), 24.0 (dd,  $^2J_{P,C} = 15.3$  Hz,  $^3J_{P,C} = 2.07$  Hz,  $\text{PCH}_2$ ), 24.4 (dd,  $^2J_{P,C} = 15.4$  Hz,  $^3J_{P,C} = 2.11$  Hz,  $\text{PCH}_2$  isomer), 40.4 (dd,  $^2J_{P,C} = 16.9$  Hz,  $^3J_{P,C} = 1.51$  Hz,  $\text{PCH}$ ), 41.0 (dd,  $^2J_{P,C} = 15.8$  Hz,  $^3J_{P,C} = 1.35$  Hz,  $\text{PCH}$  isomer), 51.0 (m,  $\text{CH}_2\text{CH}_2\text{CH}_3$ ), 62.7 (s,  $\text{CO}_2\text{CH}_2\text{CH}_3$  isomer), 62.8 (s,  $\text{CO}_2\text{CH}_2\text{CH}_3$ ), 125.6 (dd,  $^1J_{P,C} = 27.6$  Hz,  $^2J_{P,C} = 5.22$  Hz,  $\text{PCS}$ ), 127.0 (dd,  $^1J_{P,C} = 24.6$  Hz,  $^2J_{P,C} = 5.85$  Hz,  $\text{PCS}$  isomer), 128.8 (dd,  $^1J_{P,C} = 23.8$  Hz,  $^2J_{P,C} = 4.74$  Hz,  $\text{PCS}$  isomer), 129.5 (dd,  $^1J_{P,C} = 24.3$  Hz,  $^2J_{P,C} = 4.12$  Hz,  $\text{PCS}$ ),

150.8 (dd,  $^1J_{P,C} = 19.6$  Hz,  $^2J_{P,C} = 3.27$  Hz PCN *isomer*), 152.1 (dd,  $^1J_{P,C} = 17.7$  Hz,  $^2J_{P,C} = 3.64$  Hz PCN), 153.5 (dd,  $^1J_{P,C} = 16.9$  Hz,  $^2J_{P,C} = 2.46$  Hz PCN), 153.9 (dd,  $^1J_{P,C} = 17.0$  Hz,  $^2J_{P,C} = 2.05$  Hz, PCN *isomer*), 170.2 (d,  $^2J_{P,C} = 8.04$  Hz, CO<sub>2</sub>Et), 171.1 (d,  $^2J_{P,C} = 8.72$  Hz, CO<sub>2</sub>Et *isomer*), 190.3 (m, C=S).

**<sup>31</sup>P{<sup>1</sup>H} NMR** (202.4 MHz, 298.0 K, CDCl<sub>3</sub>): δ / ppm = -80.0 (d,  $^3J_{P,P} = 29.3$  Hz, PCH<sub>2</sub> *isomer*), -79.7 (d,  $^3J_{P,P} = 28.8$  Hz, PCH<sub>2</sub>), -75.4 (d,  $^3J_{P,P} = 29.3$  Hz, PCHCO<sub>2</sub>Et *isomer*), -74.1 (d,  $^3J_{P,P} = 29.0$  Hz, PCHCO<sub>2</sub>Et).

**<sup>31</sup>P NMR** (202.4 MHz, 298.0 K, CDCl<sub>3</sub>): δ / ppm = -79.8 (m, PCH<sub>2</sub>, PCH<sub>2</sub> *isomer*), -75.4 (dm,  $^3J_{P,P} = 29.4$  Hz, PCHCO<sub>2</sub>Et *isomer*), -74.1 (dm,  $^3J_{P,H} = 29.0$  Hz, PCHCO<sub>2</sub>Et).

## 2.9 3,7-di-*n*-propyl-9-*n*-butyl-4,8-ethano[1,4]diphosphinino[2,3-d:5,6-d']bis[1,3]thiazole-2,6-dithione (4c)

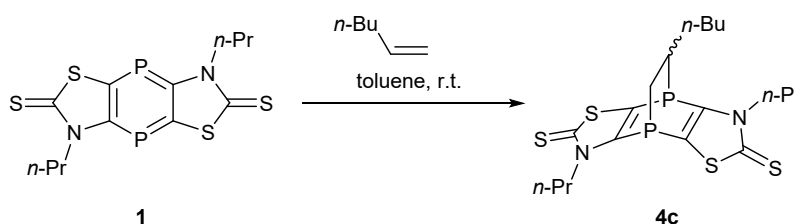

In a 20 mL Schlenk vessel, 0.1 mL (0.796 mmol, 2.08 eq.) of 1-hexene was added to a suspension of 143.8 mg (0.382 mmol, 1.00 eq.) of **1** in 10 mL toluene. The mixture was stirred for 4 h before removing volatiles *in vacuo* (10<sup>-2</sup> mbar). The residue was washed four times with 5 mL of *n*-pentane each and dried *in vacuo* (10<sup>-2</sup> mbar). The product was obtained as a colourless solid.

**Molecular formula:** C<sub>18</sub>H<sub>26</sub>N<sub>2</sub>P<sub>2</sub>S<sub>4</sub>

**Molecular weight:** 460.60 g/mol

**Yield:** 99.5 mg (0.216 mmol, 57%)

**Melting point:** 130 °C (dec. to **1**)

|                            |                |         |        |        |         |
|----------------------------|----------------|---------|--------|--------|---------|
| <b>Elemental analysis:</b> | calculated / % | C 46.94 | H 5.69 | N 6.08 | S 27.84 |
|                            | found / %      | C 41.54 | H 5.20 | N 5.24 | S 23.18 |

**MS** (EI, 70 eV, selected data): m/z (%): m/z = 460.0 [M]<sup>+</sup>, 375.9 [M-C<sub>6</sub>H<sub>12</sub>]<sup>+</sup>, 333.8 [M-C<sub>6</sub>H<sub>12</sub>-C<sub>3</sub>H<sub>7</sub>+H]<sup>+</sup>, 291.8 [M-C<sub>6</sub>H<sub>12</sub>-2 C<sub>3</sub>H<sub>7</sub>+2 H]<sup>+</sup>, 84.0 [C<sub>6</sub>H<sub>12</sub>]<sup>+</sup>.

**IR** (ATR Diamond, selected data):  $\tilde{\nu}$  / cm<sup>-1</sup> = 2868 (w,  $\nu$ (CH)), 2921 (m,  $\nu$ (CH)), 2955 (w,  $\nu$ (CH)).

**<sup>1</sup>H NMR** (700.4 MHz, 298.0 K, CDCl<sub>3</sub>): δ / ppm = 0.92 (td, 6H,  $^3J_{H,H} = 7.34$  Hz,  $^4J_{H,H} = 3.74$  Hz, CH<sub>2</sub>CH<sub>2</sub>CH<sub>2</sub>CH<sub>3</sub>), 1.01 (td, 6H,  $^3J_{H,H} = 7.40$  Hz,  $^4J_{H,H} = 2.74$  Hz, CH<sub>2</sub>CH<sub>2</sub>CH<sub>3</sub>), 1.03 (q, 6H,  $^3J_{H,H} = 7.74$  Hz, CH<sub>2</sub>CH<sub>2</sub>CH<sub>3</sub>), 1.18–1.26 (m, 1H, CH<sub>2</sub>CH<sub>2</sub>CH<sub>2</sub>CH<sub>3</sub>), 1.28–1.38 (m, PCH<sub>2</sub> (2H), CH<sub>2</sub>CH<sub>2</sub>CH<sub>2</sub>CH<sub>3</sub> (4H), CH<sub>2</sub>CH<sub>2</sub>CH<sub>2</sub>CH<sub>3</sub> (1H)), 1.41–1.54 (m, 6H, CH<sub>2</sub>CH<sub>2</sub>CH<sub>2</sub>CH<sub>3</sub> (4H), CH<sub>2</sub>CH<sub>2</sub>CH<sub>2</sub>CH<sub>3</sub> (2H)) 1.70–1.94 (m, 8H, CH<sub>2</sub>CH<sub>2</sub>CH<sub>3</sub>), 2.04–2.13 (m, 2H, PCH<sup>n</sup>Bu, PCH<sup>n</sup>Bu *isomer*), 2.20–2.28 (m, 2H, PCH<sub>2</sub>) 4.28–4.33 (m, 1H, CH<sub>2</sub>CH<sub>2</sub>CH<sub>3</sub>), 4.36–4.46 (m, 7H, CH<sub>2</sub>CH<sub>2</sub>CH<sub>3</sub>).

**<sup>13</sup>C{<sup>1</sup>H} NMR** (125.73 MHz, 298.0 K, CDCl<sub>3</sub>): δ / ppm = (176.1 MHz, 298.0 K, CDCl<sub>3</sub>): δ / ppm = 11.3 (d,  $^5J_{P,C} = 1.21$  Hz, CH<sub>2</sub>CH<sub>2</sub>CH<sub>3</sub>), 11.3 (d,  $^5J_{P,C} = 1.40$  Hz, CH<sub>2</sub>CH<sub>2</sub>CH<sub>3</sub> *isomer*), 14.0 (s, CH<sub>2</sub>CH<sub>2</sub>CH<sub>2</sub>CH<sub>3</sub>), 14.0 (s, CH<sub>2</sub>CH<sub>2</sub>CH<sub>2</sub>CH<sub>3</sub> *isomer*), 22.3 (d,  $^4J_{P,C} = 3.00$  Hz, CH<sub>2</sub>CH<sub>2</sub>CH<sub>3</sub>), 22.4 (d,  $^4J_{P,C} = 3.46$  Hz, CH<sub>2</sub>CH<sub>2</sub>CH<sub>3</sub> *isomer*), 22.4 (d,  $^4J_{P,C} = 3.48$  Hz, CH<sub>2</sub>CH<sub>2</sub>CH<sub>3</sub>, CH<sub>2</sub>CH<sub>2</sub>CH<sub>3</sub> *isomer*), 22.5 (s, CH<sub>2</sub>CH<sub>2</sub>CH<sub>2</sub>CH<sub>3</sub> *isomer*), 22.6 (s, CH<sub>2</sub>CH<sub>2</sub>CH<sub>2</sub>CH<sub>3</sub>), 27.4 (dd,  $^1J_{P,C} = 12.3$  Hz,  $^2J_{P,C} = 3.62$  Hz, PCH<sub>2</sub>, *isomer*), 27.7 (dd,  $^1J_{P,C} = 12.4$  Hz,  $^2J_{P,C} = 3.60$  Hz, PCH<sub>2</sub>), 31.1 (d,  $^4J_{P,C} = 15.4$  Hz, CH<sub>2</sub>CH<sub>2</sub>CH<sub>2</sub>CH<sub>3</sub>), 31.3 (d,  $^4J_{P,C} = 15.4$  Hz, CH<sub>2</sub>CH<sub>2</sub>CH<sub>2</sub>CH<sub>3</sub>).

isomer), 34.9 (dd,  $^4J_{P,C} = 17.3$  Hz,  $^4J_{P,C} = 1.09$  Hz,  $PCH^nBu$ ), 35.2 (dd,  $^4J_{P,C} = 10.1$  Hz,  $^4J_{P,C} = 1.79$  Hz,  $CH_2CH_2CH_2CH_3$ ), 35.4 (dd,  $^4J_{P,C} = 16.1$  Hz,  $^4J_{P,C} = 1.14$  Hz,  $PCH^nBu$  isomer), 35.7 (dd,  $^4J_{P,C} = 10.6$  Hz,  $^4J_{P,C} = 1.89$  Hz,  $CH_2CH_2CH_2CH_3$  isomer), 50.9 (d,  $^3J_{P,C} = 10.7$  Hz,  $CH_2CH_2CH_3$  isomer), 51.0 (d,  $^3J_{P,C} = 10.7$  Hz,  $CH_2CH_2CH_3$ ), 51.1 (d,  $^3J_{P,C} = 10.5$  Hz,  $CH_2CH_2CH_3$  isomer), 126.2 (dd,  $^1J_{P,C} = 28.7$  Hz,  $^2J_{P,C} = 5.67$  Hz, PCS), 127.2 (dd,  $^1J_{P,C} = 23.8$  Hz,  $^2J_{P,C} = 5.30$  Hz, PCS), 128.9 (dd,  $^1J_{P,C} = 23.5$  Hz,  $^2J_{P,C} = 5.40$  Hz, PCS isomer), 129.6 (dd,  $^1J_{P,C} = 24.0$  Hz,  $^2J_{P,C} = 6.21$  Hz, PCS isomer), 151.6 (dd,  $^1J_{P,C} = 22.0$  Hz,  $^2J_{P,C} = 3.50$  Hz, PCN isomer), 152.6 (dd,  $^1J_{P,C} = 16.8$  Hz,  $^2J_{P,C} = 3.24$  Hz, PCN isomer), 153.7 (dd,  $^1J_{P,C} = 16.1$  Hz,  $^2J_{P,C} = 3.25$  Hz, PCN), 154.9 (dd,  $^1J_{P,C} = 16.9$  Hz,  $^2J_{P,C} = 3.97$  Hz, PCN), 190.2 (d,  $^3J_{P,C} = 1.98$  Hz, C=S isomer), 190.3 (d,  $^3J_{P,C} = 2.07$  Hz, C=S), 190.4 (d,  $^3J_{P,C} = 1.86$  Hz, C=S isomer), 190.5 (d,  $^3J_{P,C} = 2.00$  Hz, C=S).

$^{31}P\{^1H\}$  NMR (121.5 MHz, 298.0 K,  $CDCl_3$ ):  $\delta$  / ppm = -77.7 (d,  $^3J_{P,P} = 24.5$  Hz,  $PCH_2$ , isomer), -77.0 (d,  $^3J_{P,P} = 24.2$  Hz,  $PCH_2$ ), -73.6 (d,  $^3J_{P,P} = 24.2$  Hz,  $PCH^nBu$ ), -72.6 (d,  $^3J_{P,P} = 24.5$  Hz,  $PCH^nBu$ , isomer).

$^{31}P$  NMR (121.5 MHz, 298.0 K,  $CDCl_3$ ):  $\delta$  / ppm = -77.7 (dt,  $^3J_{P,P} = 24.5$  Hz,  $^2J_{P,H} = 7.90$  Hz,  $PCH_2$ , isomer), -77.0 (dt,  $^3J_{P,P} = 24.2$  Hz,  $^2J_{P,H} = 8.15$  Hz,  $PCH_2$ ), -73.6 (m,  $PCH^nBu$ ), -72.6 (m,  $PCH^nBu$ , isomer).

## 2.10 3,7-di-*n*-propyl-4,8-ethano[1,4]diphosphinino[2,3-d:5,6-d']bis[1,3]thiazole-2,6-dithione (4d)

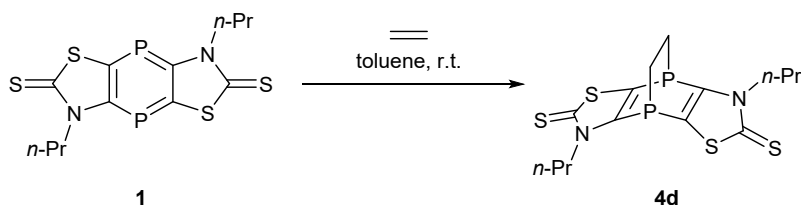

In a 10 mL Schlenk vessel, 7.0 mg (0.0186 mmol) of **1** was stirred in dichloromethane under an atmosphere of ethene. After 2 h, volatiles were removed *in vacuo* ( $10^{-2}$  mbar) and the product was obtained as a colourless solid.

**Molecular formula:**  $C_{14}H_{18}N_2P_2S_4$

**Molecular weight:** 404.50 g/mol

**Yield:** 7.5 mg (0.0185 mmol, 100%)

**Melting point:** 183 °C (dec. to **1**)

|                            |                |         |        |        |         |
|----------------------------|----------------|---------|--------|--------|---------|
| <b>Elemental analysis:</b> | calculated / % | C 41.57 | H 4.49 | N 6.93 | S 31.70 |
|                            | found / %      | C 41.36 | H 4.56 | N 6.82 | S 32.48 |

**MS** (pos. ESI, selected data):  $m/z$  (%): 403.9 [ $M$ ] $^{+}$ , 376.0 [ $M-C_2H_4$ ] $^{+}$ , 333.8 [ $M-C_2H_4-C_3H_7+H$ ] $^{+}$ , 291.9 [ $M-C_2H_4-2 C_3H_7+2 H$ ] $^{+}$ .

**IR** (ATR Diamond, selected data):  $\tilde{\nu}$  /  $cm^{-1}$  = 2869 (w,  $\nu(CH)$ ), 2927 (w,  $\nu(CH)$ ), 2957 (w,  $\nu(CH)$ ).

$^1H$  NMR (400.3 MHz, 298.1 K,  $CDCl_3$ ):  $\delta$  / ppm = 1.00 (t, 6H,  $^3J_{H,H} = 7.39$  Hz,  $CH_2CH_2CH_3$ ), 1.69–1.95 (m, 4H,  $CH_2CH_2CH_3$ ), 1.87–1.92 (m, 4H,  $PCH_2$ ), 4.31–4.44 (m, 4H,  $CH_2CH_2CH_3$ ).

$^{13}C\{^1H\}$  NMR (100.7 MHz, 298.2 K,  $CDCl_3$ ):  $\delta$  / ppm = 11.3 (s,  $CH_2CH_2CH_3$ ), 19.6 (t,  $^{1/2}J_{P,C} = 7.09$  Hz,  $PCH_2$ ), 22.4 (t,  $^{4/5}J_{P,C} = 1.89$  Hz,  $CH_2CH_2CH_3$ ), 50.9 (t,  $^{3/4}J_{P,C} = 5.07$  Hz,  $CH_2CH_2CH_3$ ), 127.8 (dd,  $^1J_{P,C} = 16.3$  Hz,  $^2J_{P,C} = 13.4$  Hz, PCS), 153.0 (dd,  $^1J_{P,C} = 11.0$  Hz,  $^2J_{P,C} = 9.07$  Hz, PCN), 190.2 (s, C=S).

$^{31}P\{^1H\}$  NMR (162.0 MHz, 298.1 K,  $CDCl_3$ ):  $\delta$  / ppm = -82.1 (s).

$^{31}\text{P}$  NMR (121.5 MHz, 298.1 K,  $\text{CDCl}_3$ ):  $\delta$  / ppm = -82.1 (m).

2.11 *rel*-(9*S*,10*R*)-3,7-di-*n*-propyl-4,8-[1',2']-cyclohexano[1,4]diphosphinino[2,3-*d*:5,6-*d'*]bis[1,3]thiazole-2,6-dithione (4e)

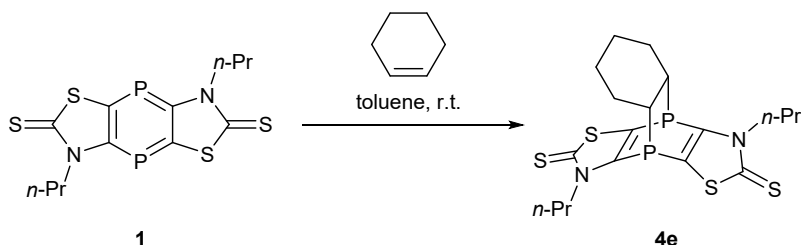

In a 25 mL Schlenk vessel, 0.25 mL (2.47 mmol, 11.12 eq.) of cyclohexene were added to a suspension of 83.4 mg (0.222 mmol, 1.00 eq) of **1** in 10 mL toluene. The mixture was stirred for 24 h at ambient temperature and volatiles were removed *in vacuo* ( $10^{-2}$  mbar). The residue was washed three times with 3 mL of *n*-pentane each and dried *in vacuo* ( $10^{-2}$  mbar). The product was obtained as a colourless solid.

**Molecular formula:**  $\text{C}_{18}\text{H}_{24}\text{N}_2\text{P}_2\text{S}_4$

**Molecular weight:** 458.60 g/mol

**Yield:** 75.1 mg (0.164 mmol, 74%)

**Melting point:** 79 °C

|                            |                |         |        |        |
|----------------------------|----------------|---------|--------|--------|
| <b>Elemental analysis:</b> | calculated / % | C 47.14 | H 5.28 | N 6.11 |
|                            | found / %      | C 42.34 | H 5.59 | N 5.30 |

**MS** (EI, 70 eV, selected data):  $m/z$  (%): 475.0 (2)  $[\text{M}+\text{OH}]^{+*}$ , 459.0 (1)  $[\text{M}+\text{H}]^{+*}$ , 458.0 (1)  $[\text{M}]^{+*}$ , 443.0 (2)  $[\text{M}-\text{CH}_3]^{+*}$ , 427.1 (9)  $[\text{M}-2\text{CH}_3-\text{H}]^{+*}$ , 219.2 (100)  $[\text{M}-2\text{CS}_2-\text{C}_3\text{H}_7-\text{H}]^{+*}$ .

**HRMS** (pos. ESI) for  $\text{C}_{18}\text{H}_{24}\text{N}_2\text{P}_2\text{S}_4$  theor./exp. 459.0370/459.0370  $[\text{M}+\text{H}]^{+*}$ .

**IR** (ATR Diamond, selected data):  $\tilde{\nu}$  /  $\text{cm}^{-1}$  = 2871 (w,  $\nu(\text{CH})$ ), 2929 (m,  $\nu(\text{CH})$ ).

**$^1\text{H}$  NMR** (700.4 MHz, 298.0 K,  $\text{CDCl}_3$ ):  $\delta$  / ppm = 0.77–0.90 (m, 2H,  $\text{PCHCH}_2\text{CH}_2$ ), 1.00 (t, 3H,  $^3J_{\text{H,H}} = 7.36$  Hz,  $\text{CH}_2\text{CH}_2\text{CH}_3$ ), 1.02 (t, 3H,  $^3J_{\text{H,H}} = 7.40$  Hz,  $\text{CH}_2\text{CH}_2\text{CH}_3$ ), 0.94–1.08 (m, 2H,  $\text{PCHCH}_2\text{CH}_2$ ), 1.67–1.78 (m, 4H,  $\text{PCHCH}_2$ ), 1.78–1.92 (m, 4H,  $\text{CH}_2\text{CH}_2\text{CH}_2$ ), 2.08–2.20 (m, 2H,  $\text{PCH}$ ), 4.26–4.45 (m, 4H,  $\text{CH}_2\text{CH}_2\text{CH}_3$ ).

**$^{13}\text{C}\{^1\text{H}\}$  NMR** (176.1 MHz, 298.0 K,  $\text{CDCl}_3$ ):  $\delta$  / ppm = 11.3 (s,  $\text{CH}_2\text{CH}_2\text{CH}_3$ ), 21.4 (d,  $^2J_{\text{P,H}} = 17.7$  Hz,  $\text{PCHCH}_2$ ), 21.6 (d,  $^2J_{\text{P,H}} = 17.4$  Hz,  $\text{PCHCH}_2$ ), 22.3 (d,  $^4J_{\text{P,C}} = 3.18$  Hz,  $\text{CH}_2\text{CH}_2\text{CH}_3$ ), 22.4 (d,  $^4J_{\text{P,C}} = 3.43$  Hz,  $\text{CH}_2\text{CH}_2\text{CH}_3$ ), 25.0 (d,  $^3J_{\text{P,H}} = 19.9$  Hz,  $\text{PCHCH}_2\text{CH}_2$ ), 25.4 (d,  $^3J_{\text{P,H}} = 17.6$  Hz,  $\text{PCHCH}_2\text{CH}_2$ ), 34.8 (dd,  $^1J_{\text{P,H}} = 10.3$  Hz,  $^2J_{\text{P,H}} = 3.67$  Hz,  $\text{PCH}$ ), 35.3 (dd,  $^1J_{\text{P,H}} = 10.9$  Hz,  $^2J_{\text{P,H}} = 3.65$  Hz,  $\text{PCH}$ ), 51.0 (d,  $^3J_{\text{P,C}} = 10.2$  Hz,  $\text{CH}_2\text{CH}_2\text{CH}_3$ ), 51.1 (d,  $^3J_{\text{P,C}} = 10.4$  Hz,  $\text{CH}_2\text{CH}_2\text{CH}_3$ ), 127.3 (dd,  $^1J_{\text{P,C}} = 27.4$  Hz,  $^2J_{\text{P,C}} = 5.67$  Hz,  $\text{PCS}$ ), 127.6 (dd,  $^1J_{\text{P,C}} = 23.9$  Hz,  $^2J_{\text{P,C}} = 5.93$  Hz,  $\text{PCS}$ ), 152.4 (dd,  $^1J_{\text{P,C}} = 17.0$  Hz,  $^2J_{\text{P,C}} = 3.60$  Hz,  $\text{PCN}$ ), 153.3 (dd,  $^1J_{\text{P,C}} = 20.3$  Hz,  $^2J_{\text{P,C}} = 3.25$  Hz,  $\text{PCN}$ ), 190.3 (s,  $\text{C}=\text{S}$ ), 190.6 (s,  $\text{C}=\text{S}$ ).

**$^{31}\text{P}\{^1\text{H}\}$  NMR** (162.0 MHz, 298.0 K,  $\text{CDCl}_3$ ):  $\delta$  / ppm = -69.5 (d,  $^3J_{\text{P,H}} = 20.4$  Hz), -68.3 (d,  $^3J_{\text{P,H}} = 20.4$  Hz).

<sup>31</sup>P NMR (202.4 MHz, 298.0 K, CDCl<sub>3</sub>): δ / ppm = (162.0 MHz, 298.0 K, CDCl<sub>3</sub>): δ / ppm = -69.5 (m), -68.3 (m).

2.12 9,9-diethyl-3,7-di-*n*-propyl-4,8-ethano[1,4]diphosphinino[2,3-d:5,6-d']bis[1,3]thiazole-2,6-dithione (4f)

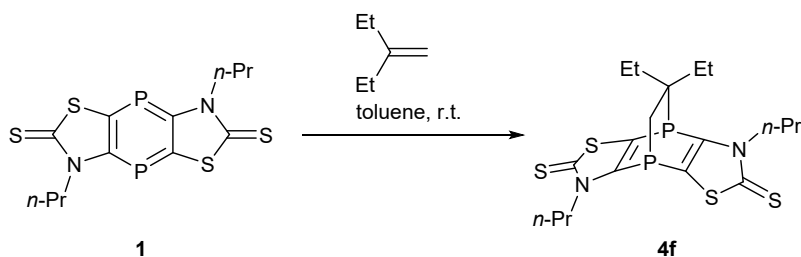

In a 10 mL Schlenk vessel, 0.05 mL (0.409 mmol, 2.42 eq.) of 2-ethyl-1-butene were added to a suspension of 63.7 mg (0.169 mmol, 1.00 eq.) of **1** in 4 mL toluene. The mixture was stirred for 48 h at ambient temperature and volatiles were removed *in vacuo* (10<sup>-2</sup> mbar). The residue was washed three times with 2 mL of *n*-pentane each and dried *in vacuo* (10<sup>-2</sup> mbar). The product was obtained as a colourless solid.

**Molecular formula:** C<sub>18</sub>H<sub>26</sub>N<sub>2</sub>P<sub>2</sub>S<sub>4</sub>

**Molecular weight:** 460.61 g/mol

**Yield:** 39 mg (0.085 mmol, 80%)

**Melting point:** 150 °C (dec. to **1**)

|                            |                |         |        |        |
|----------------------------|----------------|---------|--------|--------|
| <b>Elemental analysis:</b> | calculated / % | C 46.94 | H 5.69 | N 6.08 |
|                            | found / %      | C 47.88 | H 6.09 | N 5.90 |

**MS** (EI, 70 eV, selected data): m/z (%): 460.1 (2) [M]<sup>++</sup>, 376.0 (71) [M-C<sub>6</sub>H<sub>12</sub>]<sup>++</sup>, 334.0 (35) [M-C<sub>6</sub>H<sub>12</sub>-C<sub>3</sub>H<sub>7</sub>+H]<sup>++</sup>, 291.9 (100) [M-C<sub>6</sub>H<sub>12</sub>-2 C<sub>3</sub>H<sub>7</sub>+2 H]<sup>++</sup>.

**HRMS** (neg. ESI) for C<sub>18</sub>H<sub>26</sub>N<sub>2</sub>P<sub>2</sub>S<sub>4</sub>OH theor./exp. 477.0476/477.0479 [M+OH]<sup>++</sup>.  
 for C<sub>12</sub>H<sub>15</sub>N<sub>2</sub>P<sub>2</sub>S<sub>4</sub>OH theor./exp. 392.9537/392.9535 [M-C<sub>6</sub>H<sub>12</sub>+OH]<sup>++</sup>.  
 (pos. ESI) for C<sub>18</sub>H<sub>26</sub>N<sub>2</sub>P<sub>2</sub>S<sub>4</sub>H theor./exp. 461.0527/461.0531 [M+H]<sup>++</sup>.  
 for C<sub>12</sub>H<sub>15</sub>N<sub>2</sub>P<sub>2</sub>S<sub>4</sub>H theor./exp. 376.9588/376.9586 [M-C<sub>6</sub>H<sub>12</sub>+H]<sup>++</sup>.

<sup>1</sup>H NMR (500.0 MHz, 298.0 K, CDCl<sub>3</sub>): δ / ppm = 0.92–1.02 (m, 12H, CH<sub>2</sub>CH<sub>2</sub>, CCH<sub>2</sub>CH<sub>3</sub>), 1.16–1.50 (m, 4H, CCH<sub>2</sub>CH<sub>3</sub>), 1.56 (ddd, 1H, <sup>2</sup>J<sub>H,H</sub> = 14.4 Hz, <sup>2</sup>J<sub>P,H</sub> = 8.01 Hz, <sup>3</sup>J<sub>P,H</sub> = 2.22 Hz PCH<sub>2</sub>), 1.67 (ddd, 1H, <sup>2</sup>J<sub>H,H</sub> = 14.4 Hz, <sup>2</sup>J<sub>P,H</sub> = 7.19 Hz, <sup>3</sup>J<sub>P,H</sub> = 2.18 Hz PCH<sub>2</sub>), 1.70–1.92 (m, 4H, CH<sub>2</sub>CH<sub>2</sub>CH<sub>3</sub>), 4.18 (dddd, 1H, <sup>2</sup>J<sub>H,H</sub> = 13.1 Hz, <sup>3</sup>J<sub>H,H</sub> = 9.91 Hz, <sup>3</sup>J<sub>H,H</sub> = 6.17 Hz, <sup>4</sup>J<sub>P,H</sub> = 1.93 Hz, CH<sub>2</sub>CH<sub>2</sub>CH<sub>3</sub>), 4.38 (td, 2H, <sup>3</sup>J<sub>H,H</sub> = 7.53 Hz, <sup>4</sup>J<sub>P,H</sub> = 1.15 Hz, CH<sub>2</sub>CH<sub>2</sub>CH<sub>3</sub>) 4.50 (ddd, 1H, <sup>2</sup>J<sub>H,H</sub> = 13.1 Hz, <sup>3</sup>J<sub>H,H</sub> = 10.0 Hz, <sup>3</sup>J<sub>H,H</sub> = 5.18 Hz, CH<sub>2</sub>CH<sub>2</sub>CH<sub>3</sub>).

<sup>13</sup>C{<sup>1</sup>H} NMR (125.8 MHz, 298.0 K, CDCl<sub>3</sub>): δ / ppm = 9.21 (d, <sup>3</sup>J<sub>P,C</sub> = 6.27 Hz, C(CH<sub>2</sub>CH<sub>3</sub>)<sub>2</sub>), 9.33 (d, <sup>3</sup>J<sub>P,C</sub> = 7.96 Hz, C(CH<sub>2</sub>CH<sub>3</sub>)<sub>2</sub>), 11.2 (d, <sup>5</sup>J<sub>P,C</sub> = 1.47 Hz, CH<sub>2</sub>CH<sub>2</sub>CH<sub>3</sub>), 11.3 (s, CH<sub>2</sub>CH<sub>2</sub>CH<sub>3</sub>), 22.1 (d, <sup>4</sup>J<sub>P,C</sub> = 2.75 Hz, CH<sub>2</sub>CH<sub>2</sub>CH<sub>3</sub>), 22.3 (d, <sup>4</sup>J<sub>P,C</sub> = 3.39 Hz, CH<sub>2</sub>CH<sub>2</sub>CH<sub>3</sub>), 29.9 (d, <sup>2</sup>J<sub>P,C</sub> = 19.8 Hz, C(CH<sub>2</sub>CH<sub>3</sub>)<sub>2</sub>), 30.3 (d, <sup>2</sup>J<sub>P,C</sub> = 20.5 Hz, CCH<sub>2</sub>CH<sub>3</sub>), 34.1 (dd, <sup>1</sup>J<sub>P,C</sub> = 12.8 Hz, <sup>2</sup>J<sub>P,C</sub> = 4.25 Hz, PCH<sub>2</sub>), 46.3 (dd, <sup>1</sup>J<sub>P,C</sub> = 9.56 Hz, <sup>2</sup>J<sub>P,C</sub> = 2.16 Hz, C(CH<sub>2</sub>CH<sub>3</sub>)<sub>2</sub>), 51.1 (dd, <sup>3</sup>J<sub>P,C</sub> = 10.7 Hz, CH<sub>2</sub>CH<sub>2</sub>CH<sub>3</sub>), 51.1 (dd, <sup>3</sup>J<sub>P,C</sub> = 10.1 Hz, CH<sub>2</sub>CH<sub>2</sub>CH<sub>3</sub>), 128.2 (dd, <sup>3</sup>J<sub>P,C</sub> = 23.1 Hz, <sup>2</sup>J<sub>P,C</sub> = 4.90 Hz, PCS), 128.9 (dd, <sup>3</sup>J<sub>P,C</sub> = 27.6 Hz, <sup>2</sup>J<sub>P,C</sub> = 6.03 Hz, PCS), 153.0 (dd, <sup>1</sup>J<sub>P,C</sub> = 16.3 Hz, <sup>2</sup>J<sub>P,C</sub> = 2.86 Hz, PCN), 154.2 (dd, <sup>1</sup>J<sub>P,C</sub> = 21.1 Hz, <sup>2</sup>J<sub>P,C</sub> = 3.84 Hz, PCN), 190.4 (d, <sup>3</sup>J<sub>P,C</sub> = 2.03 Hz, C=S), 190.5 (d, <sup>3</sup>J<sub>P,C</sub> = 1.99 Hz, C=S).

**$^{31}\text{P}\{^1\text{H}\}$  NMR** (202.4 MHz, 298.0 K,  $\text{CDCl}_3$ ):  $\delta$  / ppm = -73.4 (d,  $^3J_{\text{P,P}} = 23.4$  Hz,  $\text{PCH}_2$ ), -63.4 (d,  $^3J_{\text{P,P}} = 23.4$  Hz,  $\text{PEt}_2$ ).

**$^{31}\text{P}$  NMR** (202.4 MHz, 298.0 K,  $\text{CDCl}_3$ ):  $\delta$  / ppm = -73.4 (dt,  $^3J_{\text{P,P}} = 23.4$  Hz,  $^2J_{\text{P,H}} = 7.52$  Hz,  $\text{PCH}_2$ ), -63.4 (m,  $\text{PEt}_2$ ).



### 3 NMR spectra

#### 3.1 2a

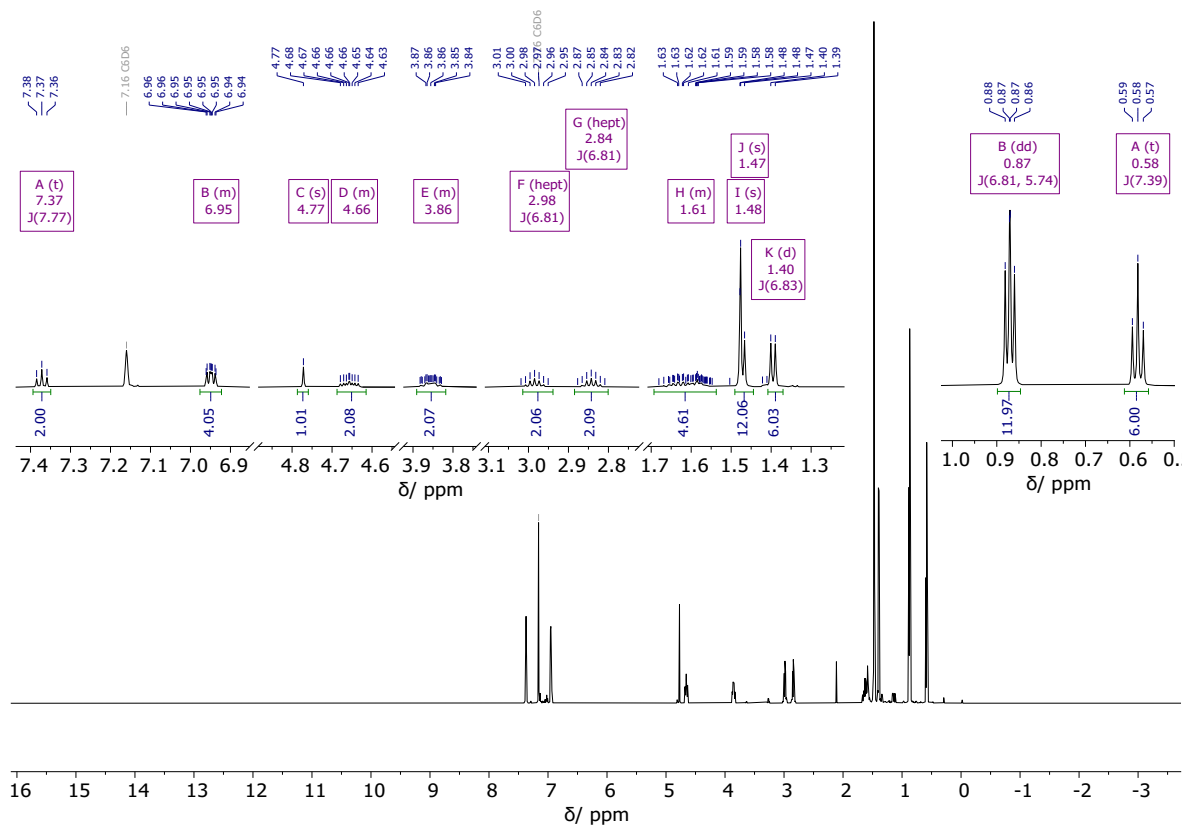

Fig. S1 <sup>1</sup>H NMR spectrum of 2a in C<sub>6</sub>D<sub>6</sub>.

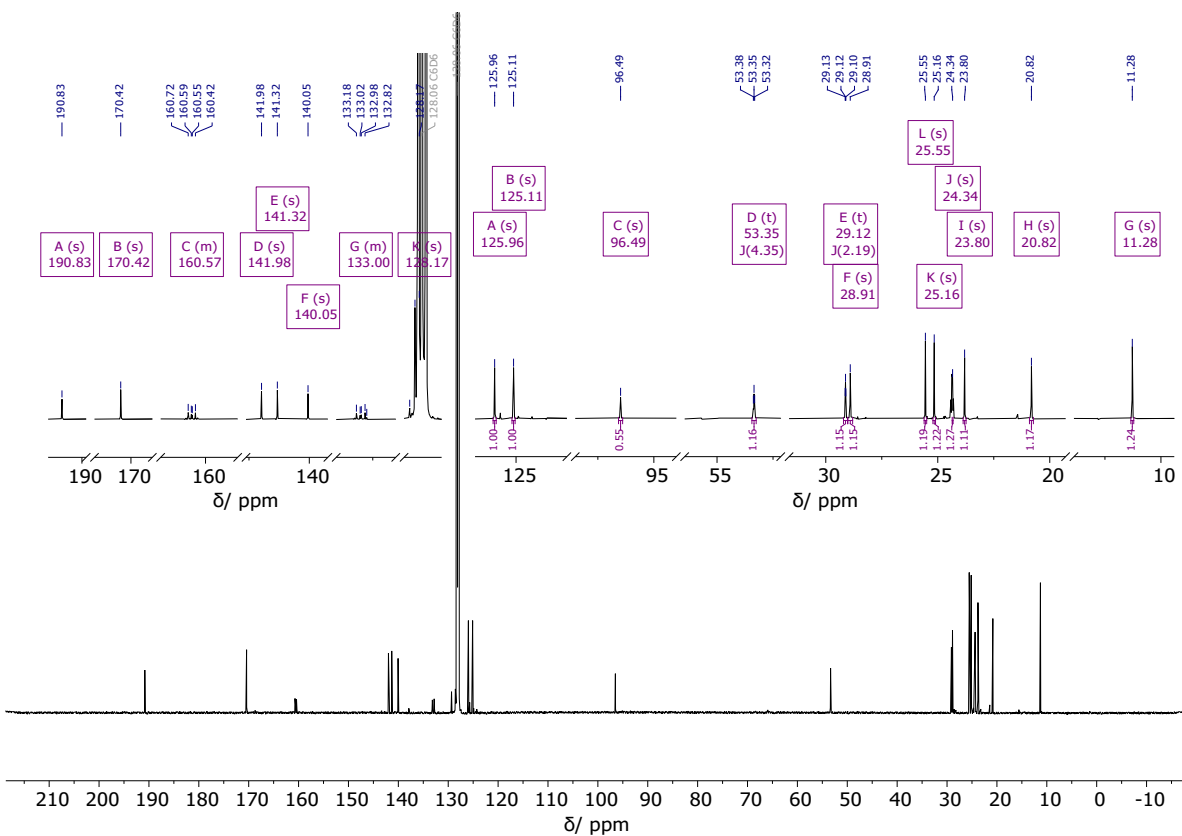

Fig. S2 <sup>13</sup>C NMR spectrum of 2a in C<sub>6</sub>D<sub>6</sub>.

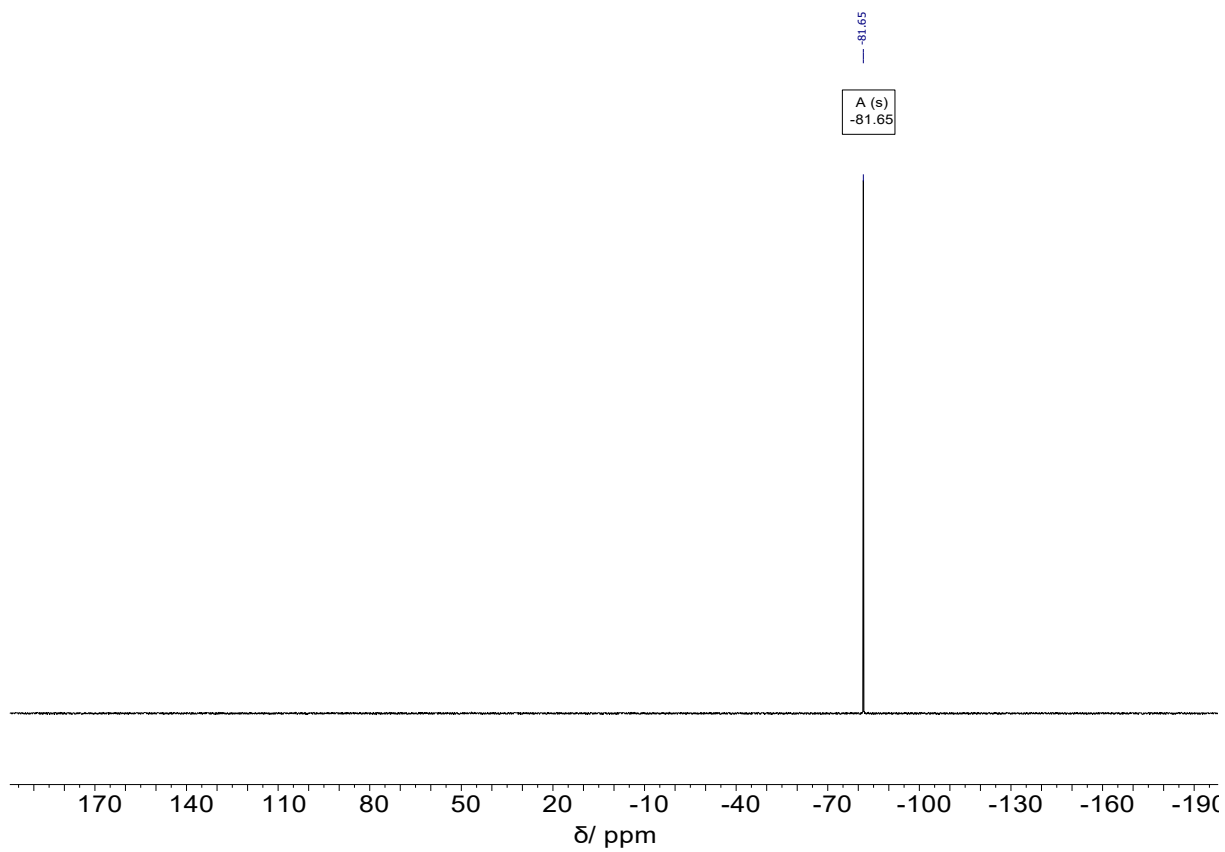

**Fig. S3**  $^{31}\text{P}\{^1\text{H}\}$  NMR spectrum of **2a** in C<sub>6</sub>D<sub>6</sub>.

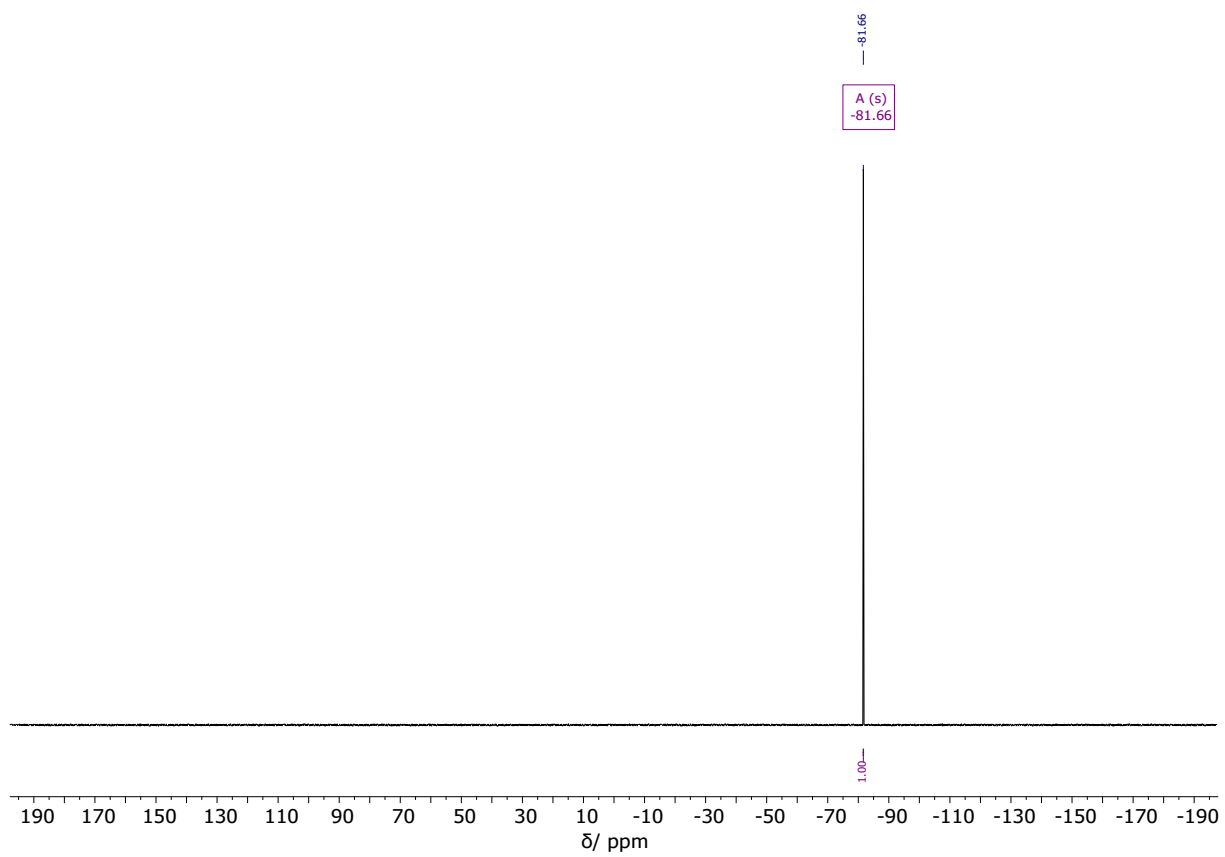

**Fig. S4**  $^{31}\text{P}$  NMR spectrum of **2a** in C<sub>6</sub>D<sub>6</sub>.

3.2 2b

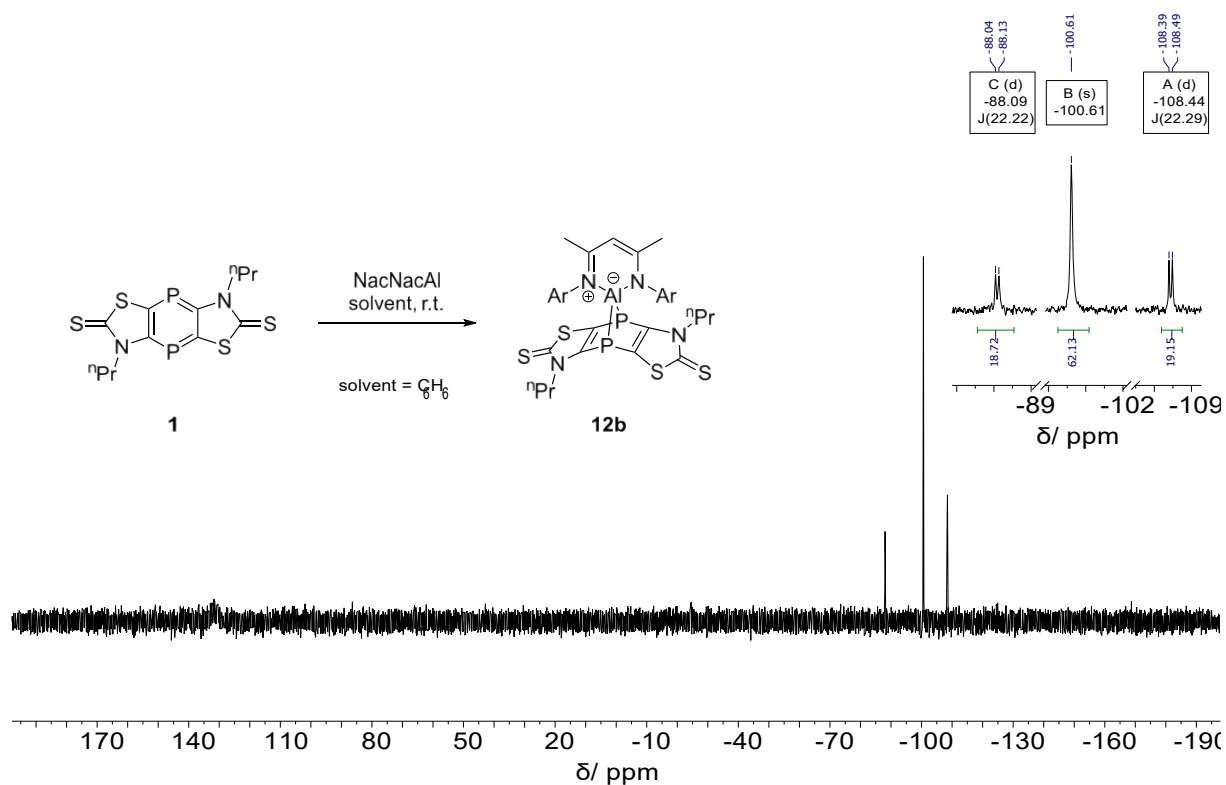

Fig. S5 <sup>31</sup>P{<sup>1</sup>H} NMR spectrum of **2b** in benzene.

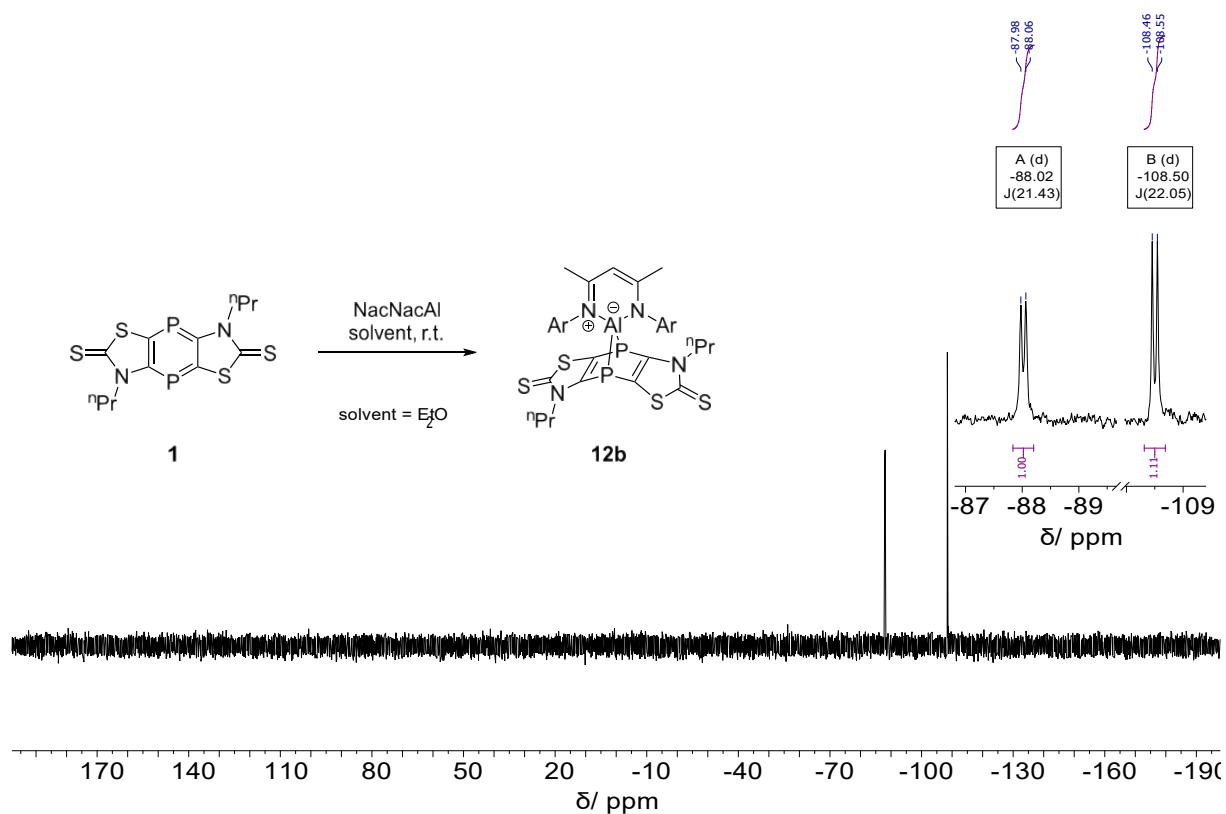

Fig. S6 <sup>31</sup>P{<sup>1</sup>H} NMR spectrum of **2b** in benzene.

3.3 3a

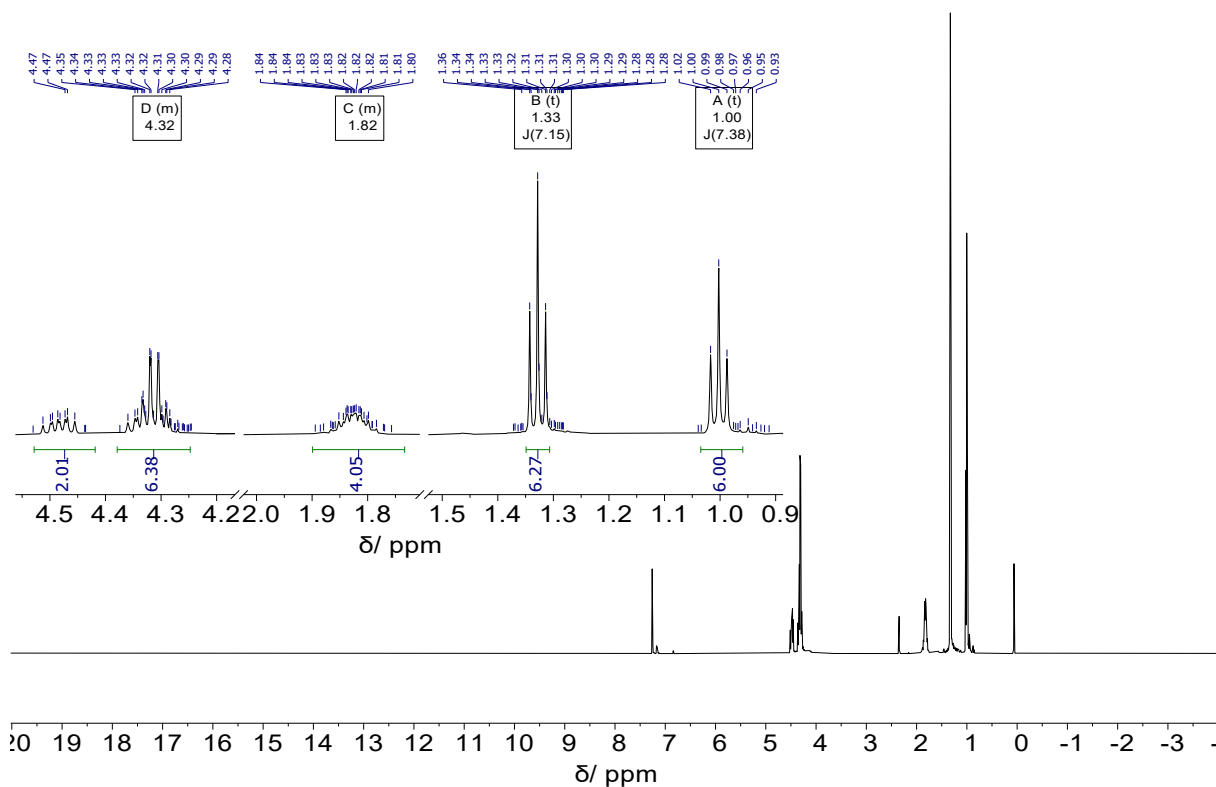

Fig. S7 <sup>1</sup>H NMR spectrum of 3a in CDCl<sub>3</sub>.

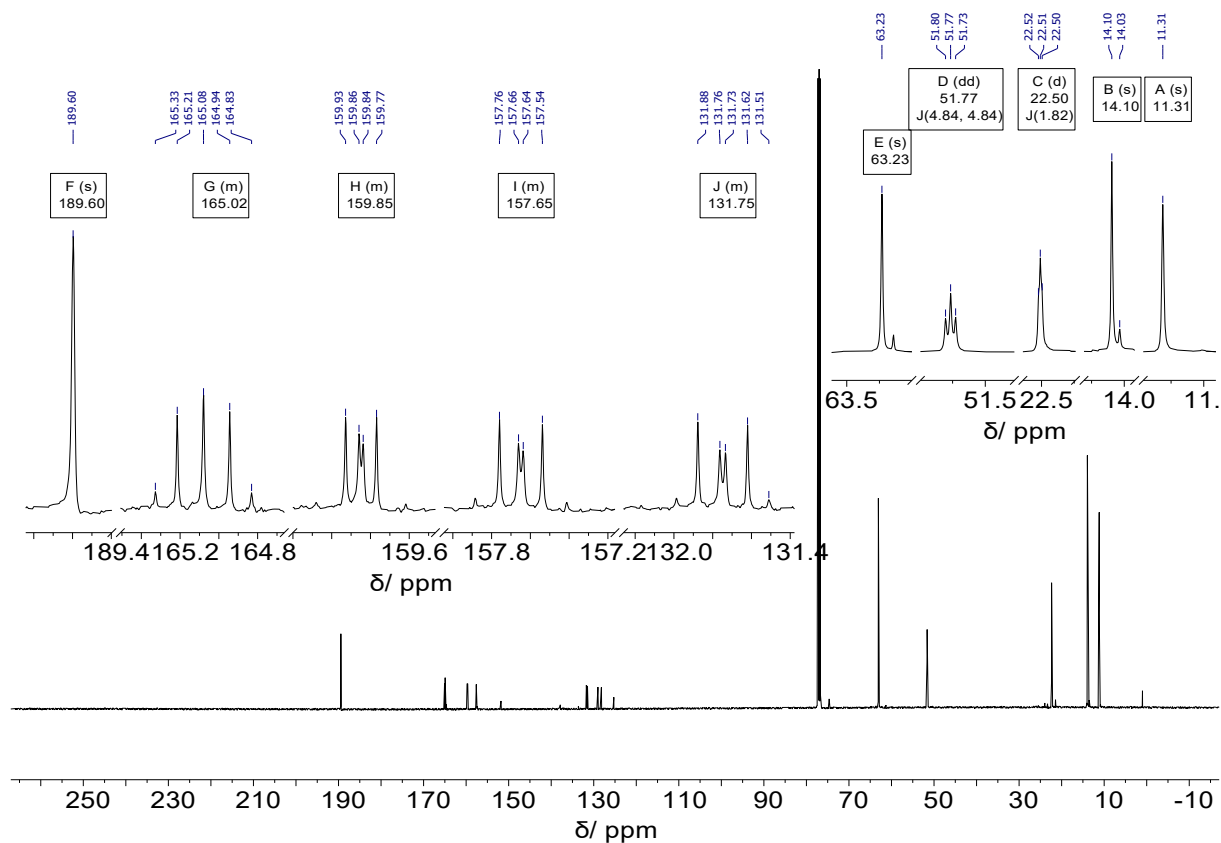

Fig. S8 <sup>13</sup>C NMR spectrum of 3a in CDCl<sub>3</sub>.

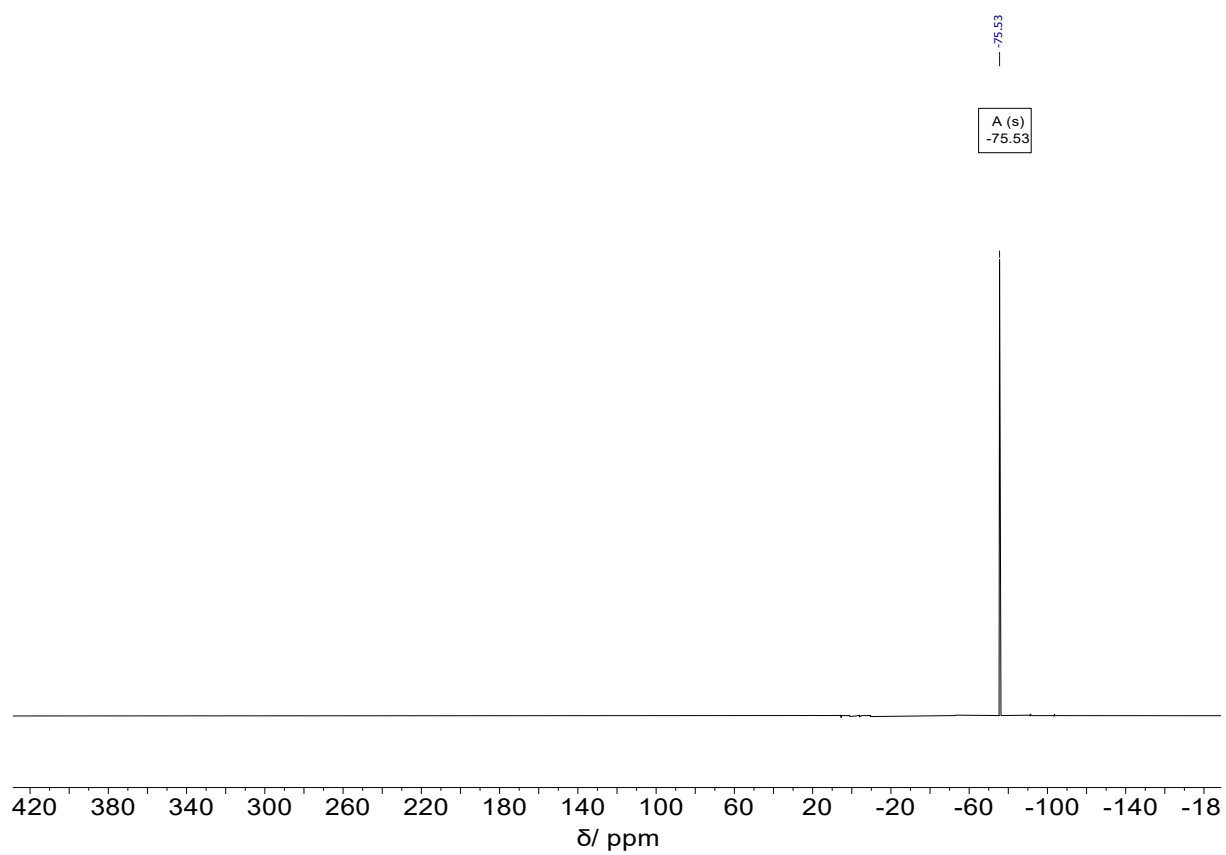

**Fig. S9**  $^{31}\text{P}\{^1\text{H}\}$  NMR spectrum of **3a** in  $\text{CDCl}_3$ .

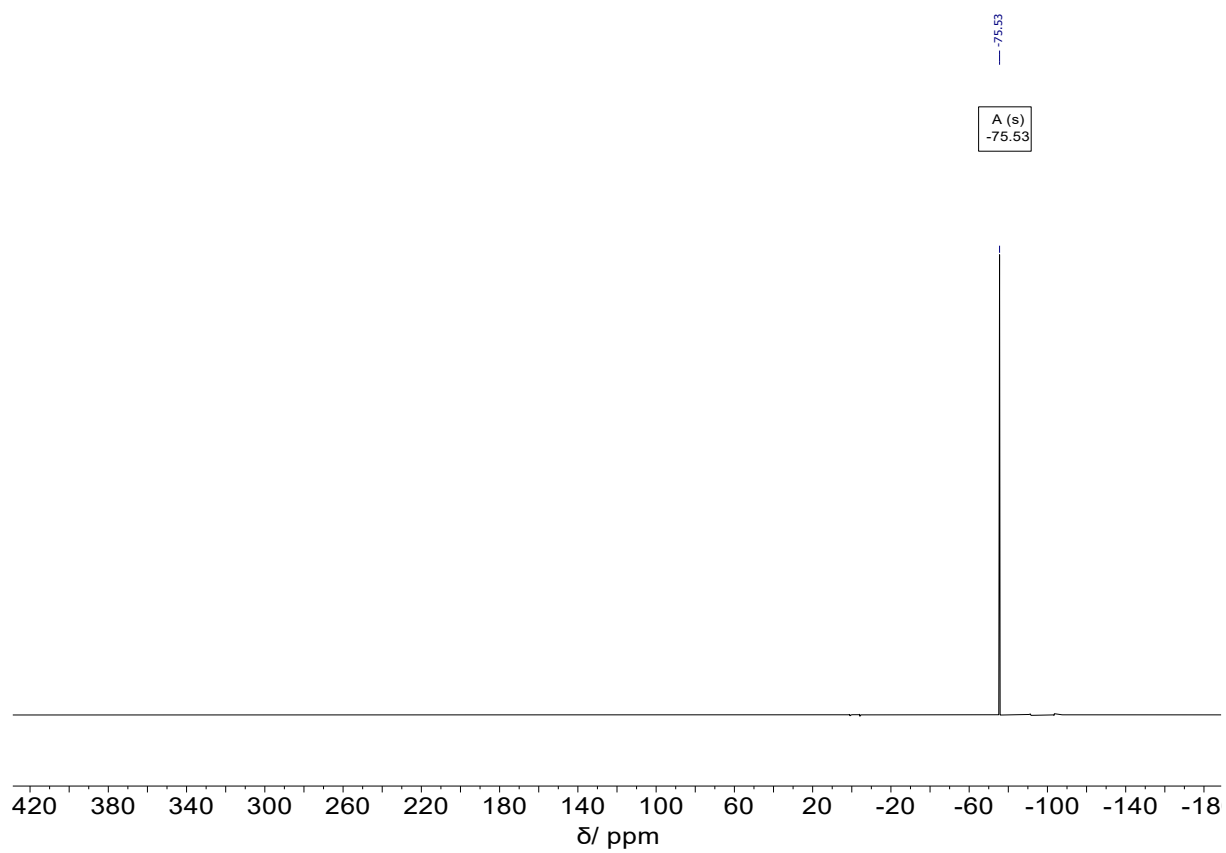

**Fig. S10**  $^{31}\text{P}$  NMR spectrum of **3a** in  $\text{CDCl}_3$ .

3.4 3b

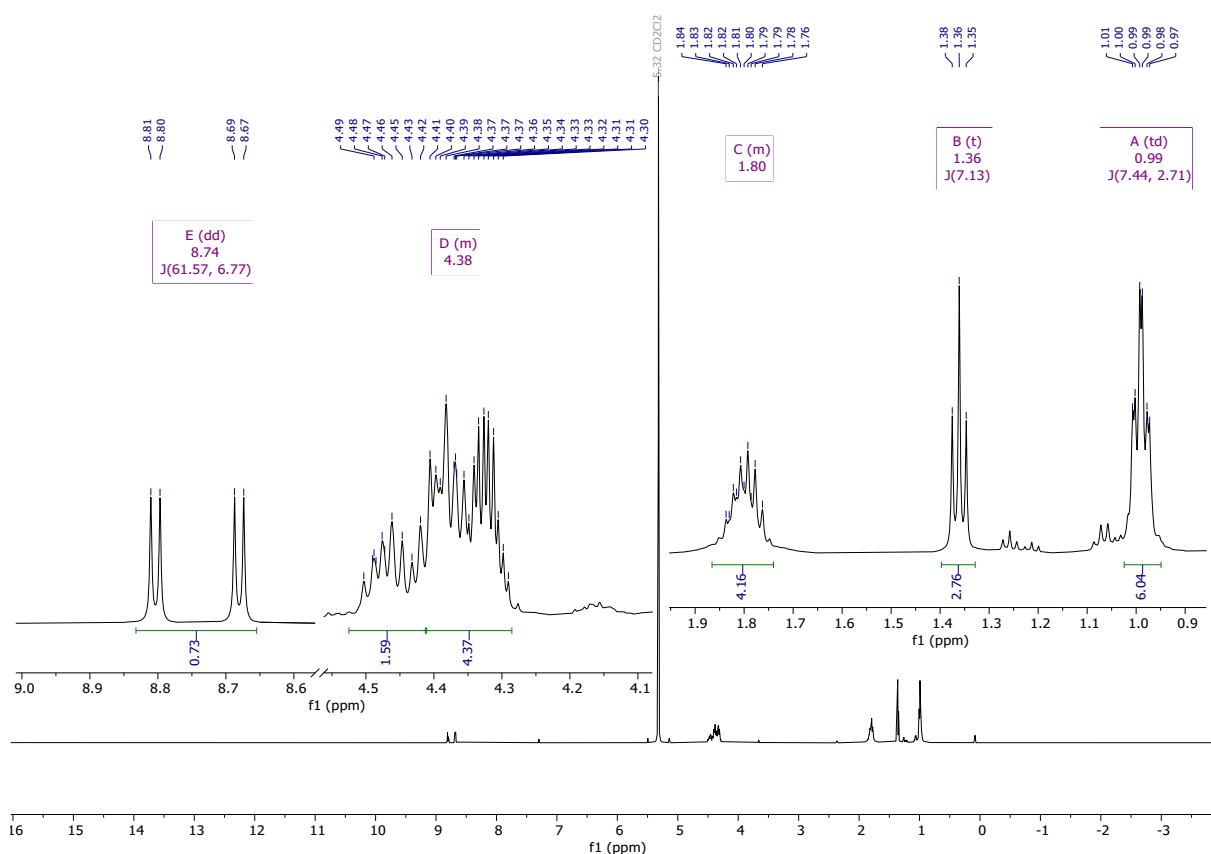

Fig. S11 <sup>1</sup>H NMR spectrum of 3b in CDCl<sub>3</sub>.

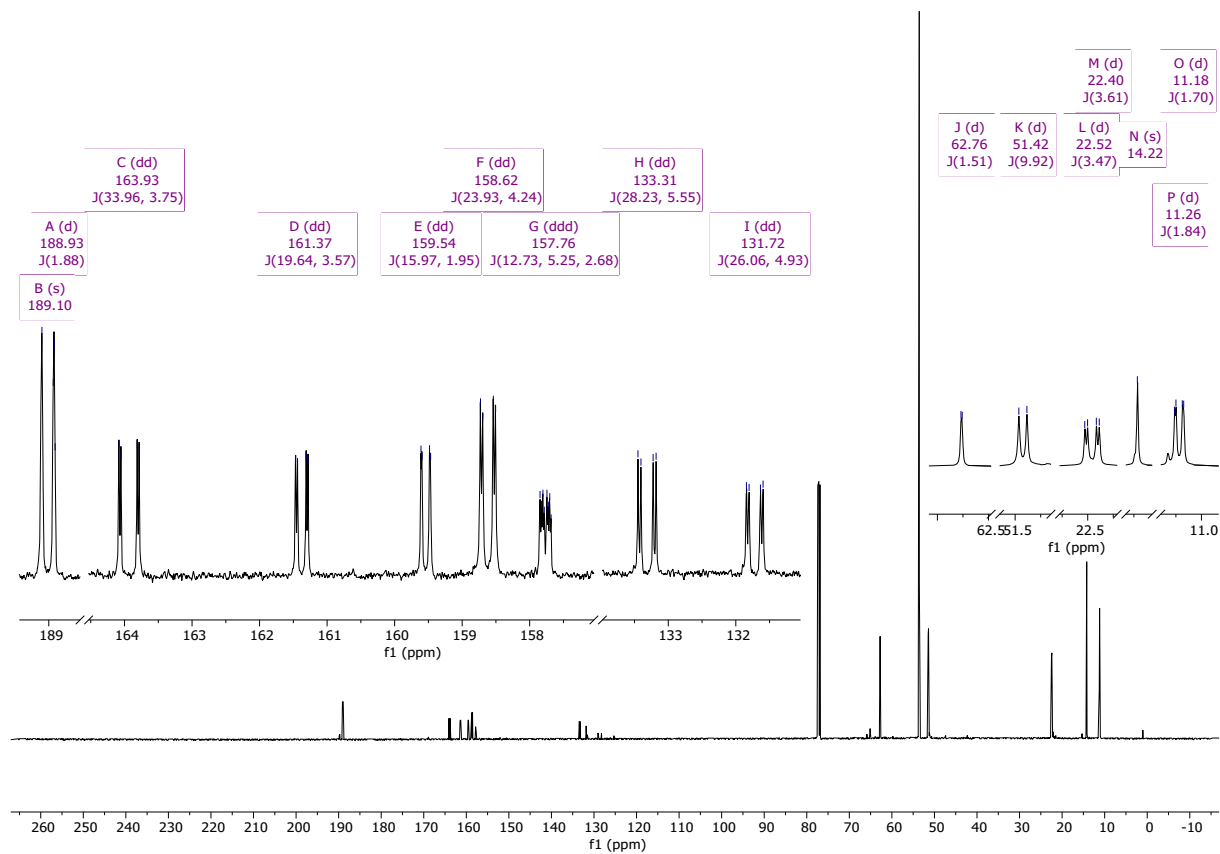

Fig. S12 <sup>13</sup>C NMR spectrum of 3b in C<sub>6</sub>D<sub>6</sub>.

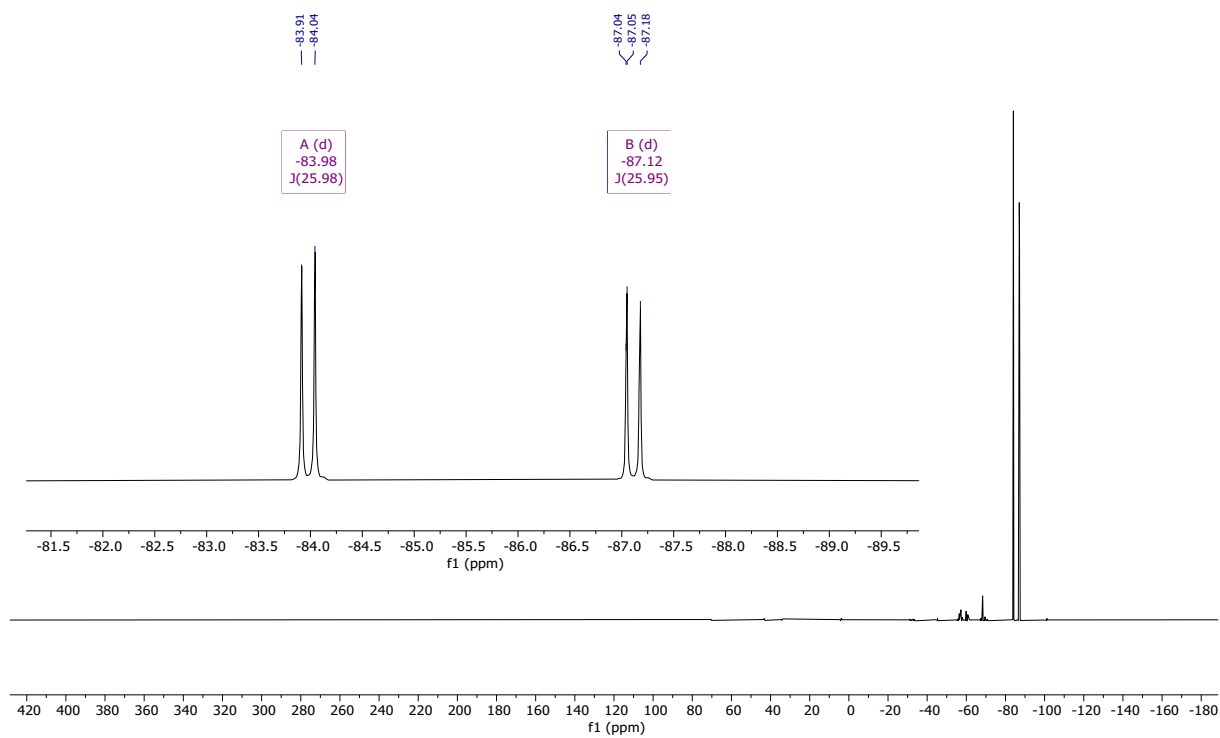

**Fig. S13**  $^{31}\text{P}\{^1\text{H}\}$  NMR spectrum of **3b** in  $\text{C}_6\text{D}_6$ .

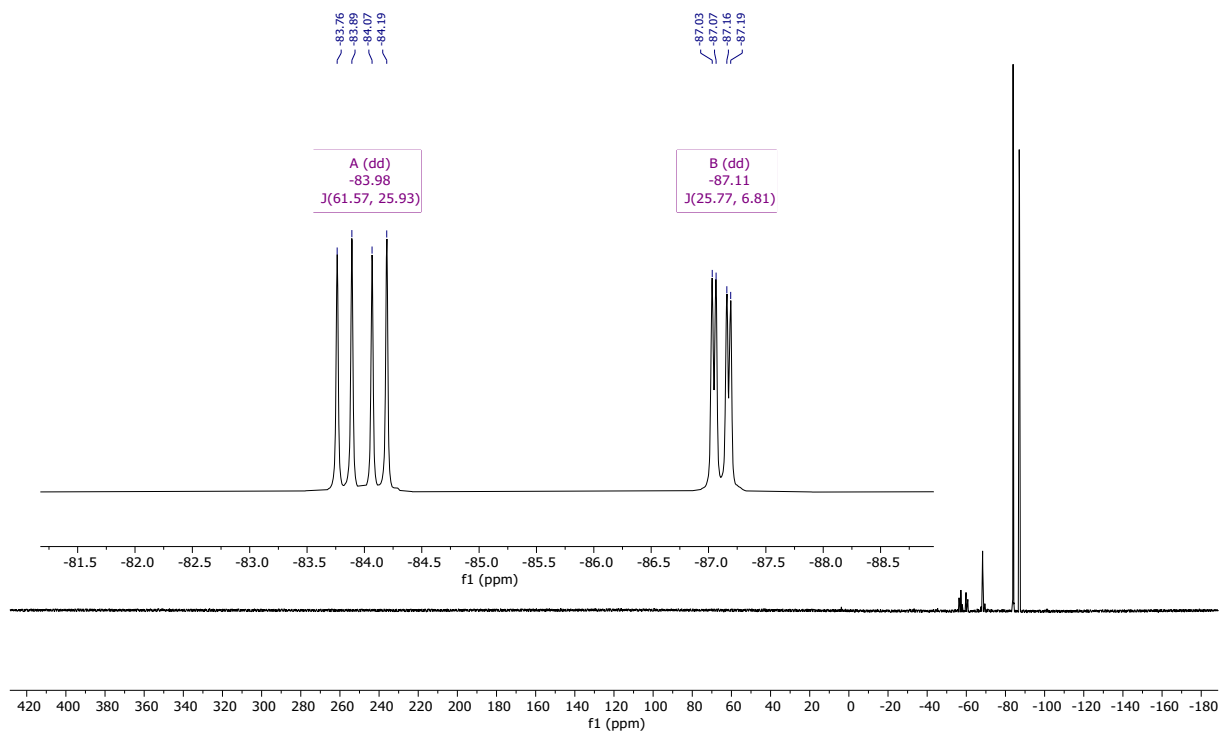

**Fig. S14**  $^{31}\text{P}$  NMR spectrum of **3b** in  $\text{CDCl}_3$ .

3.5 3c

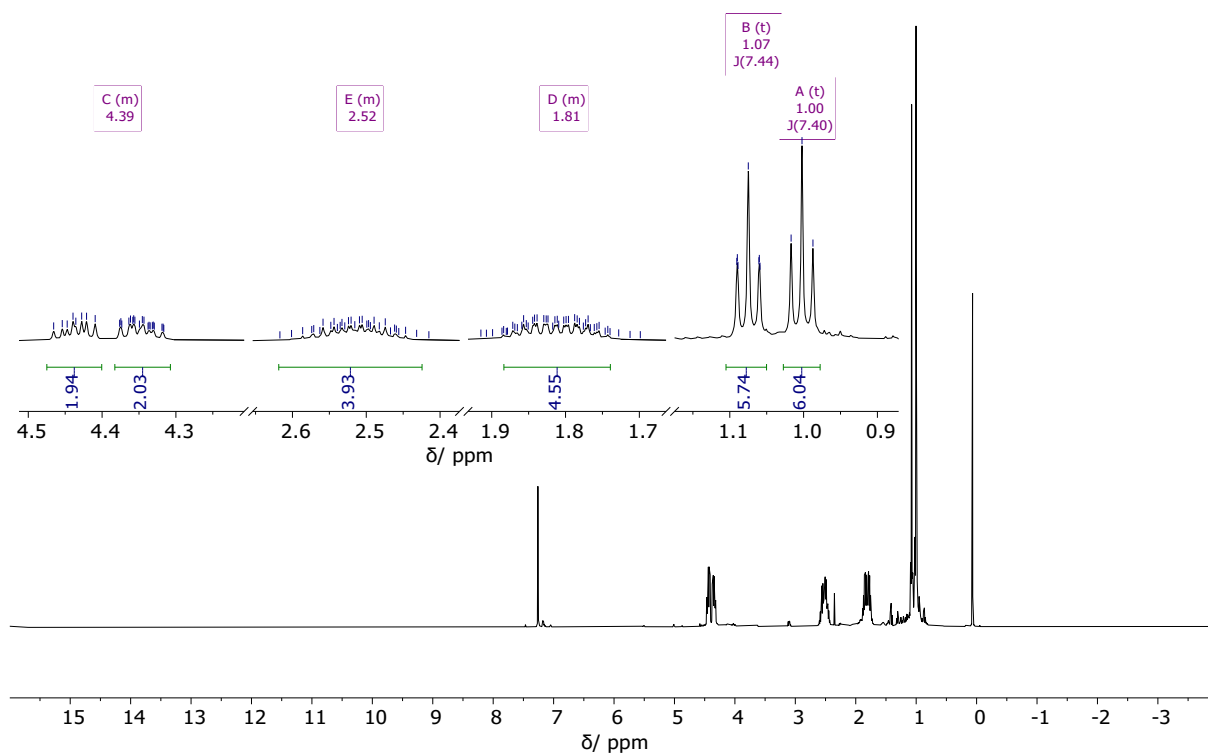

Fig. S15 <sup>1</sup>H NMR spectrum of 3c in CDCl<sub>3</sub>.

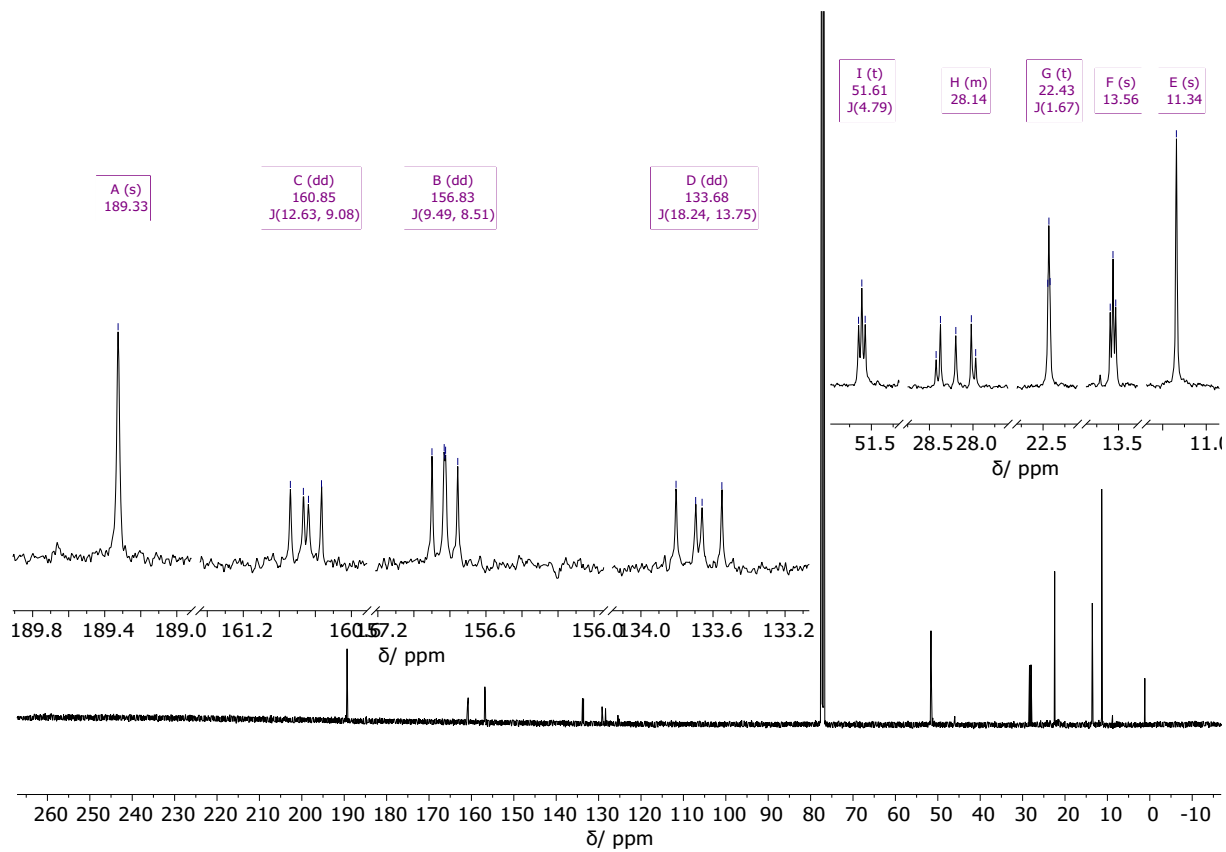

Fig. S16 <sup>13</sup>C NMR spectrum of 3c in CDCl<sub>3</sub>.



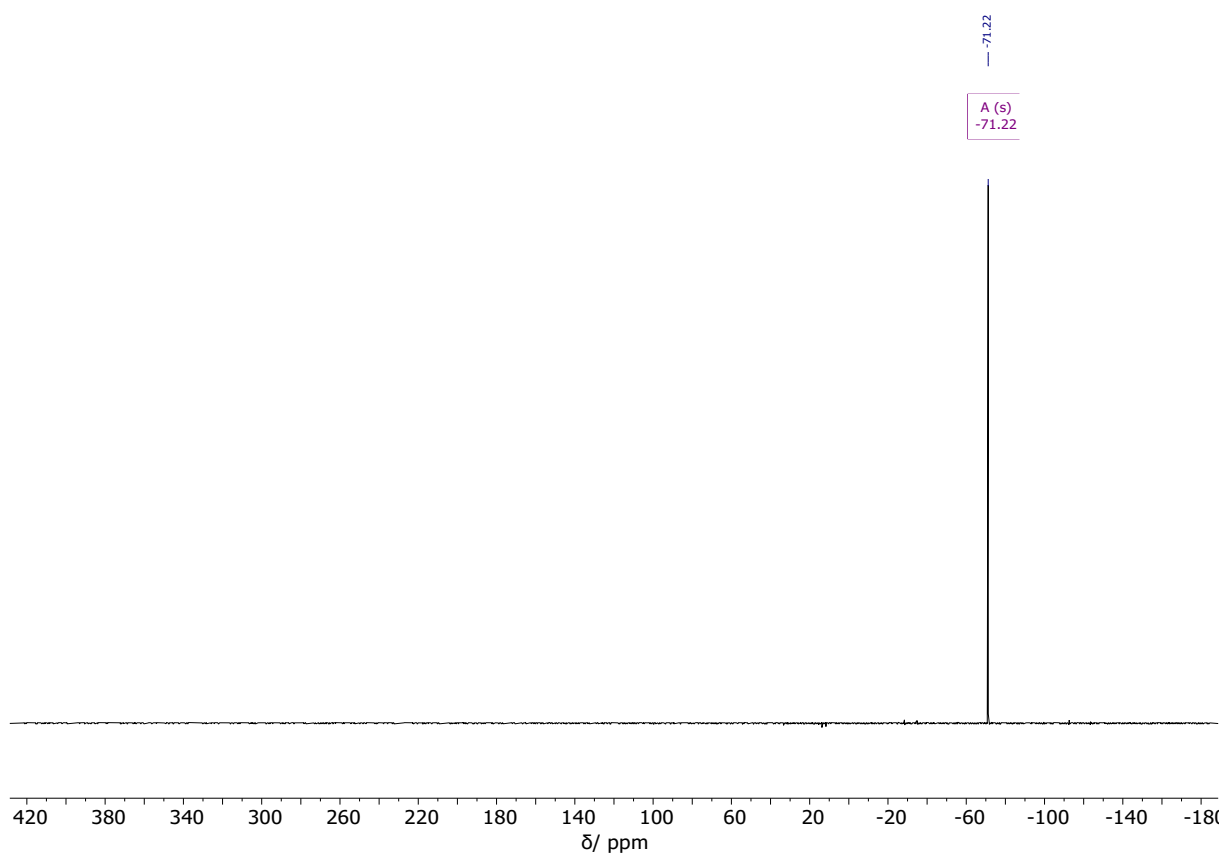

**Fig. S17**  $^{31}\text{P}\{^1\text{H}\}$  NMR spectrum of **3c** in  $\text{CDCl}_3$ .

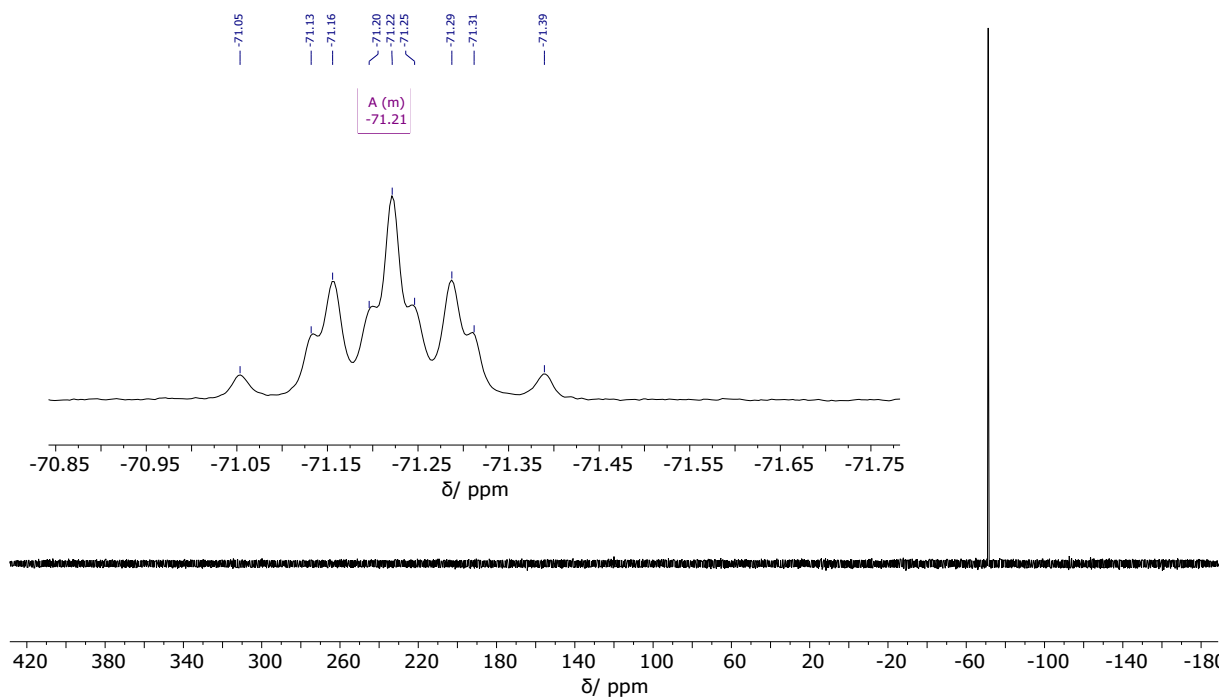

**Fig. S18**  $^{31}\text{P}$  NMR spectrum of **3c** in  $\text{CDCl}_3$ .

3.6 4a

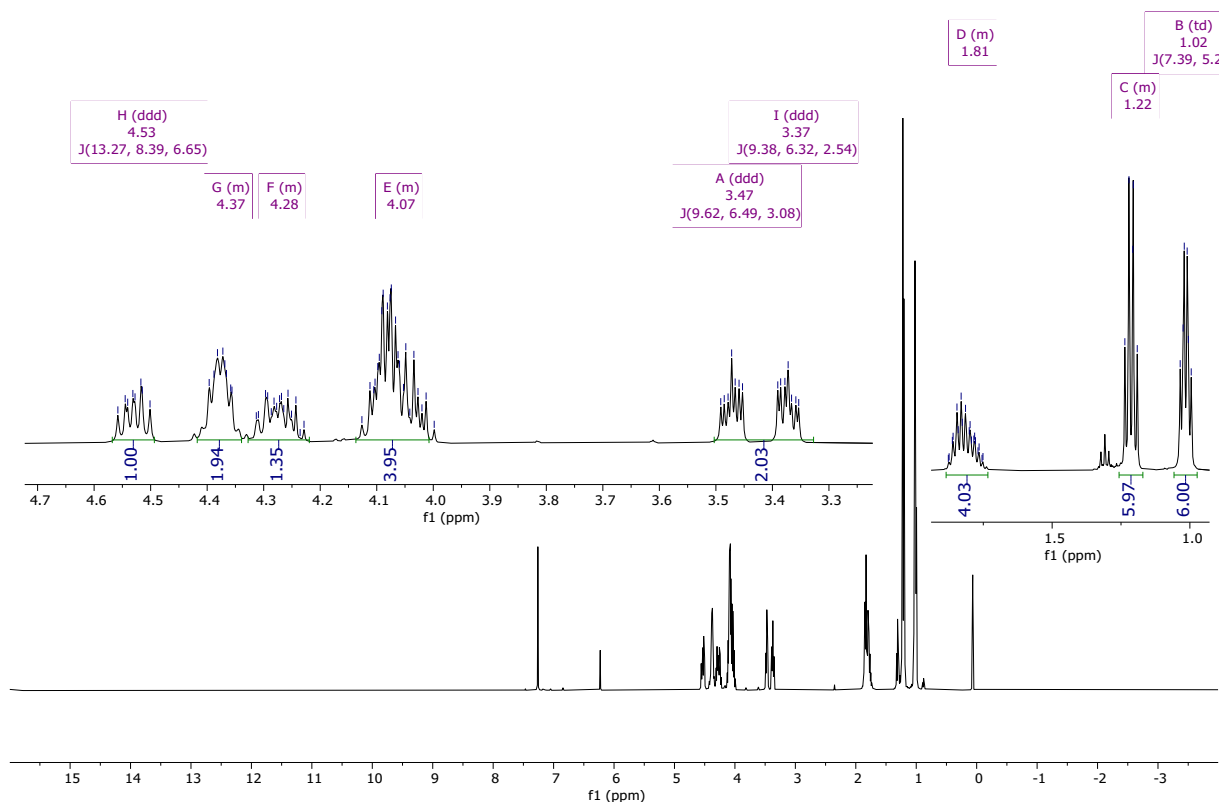

Fig. S19 <sup>1</sup>H NMR spectrum of 4a in CDCl<sub>3</sub>.

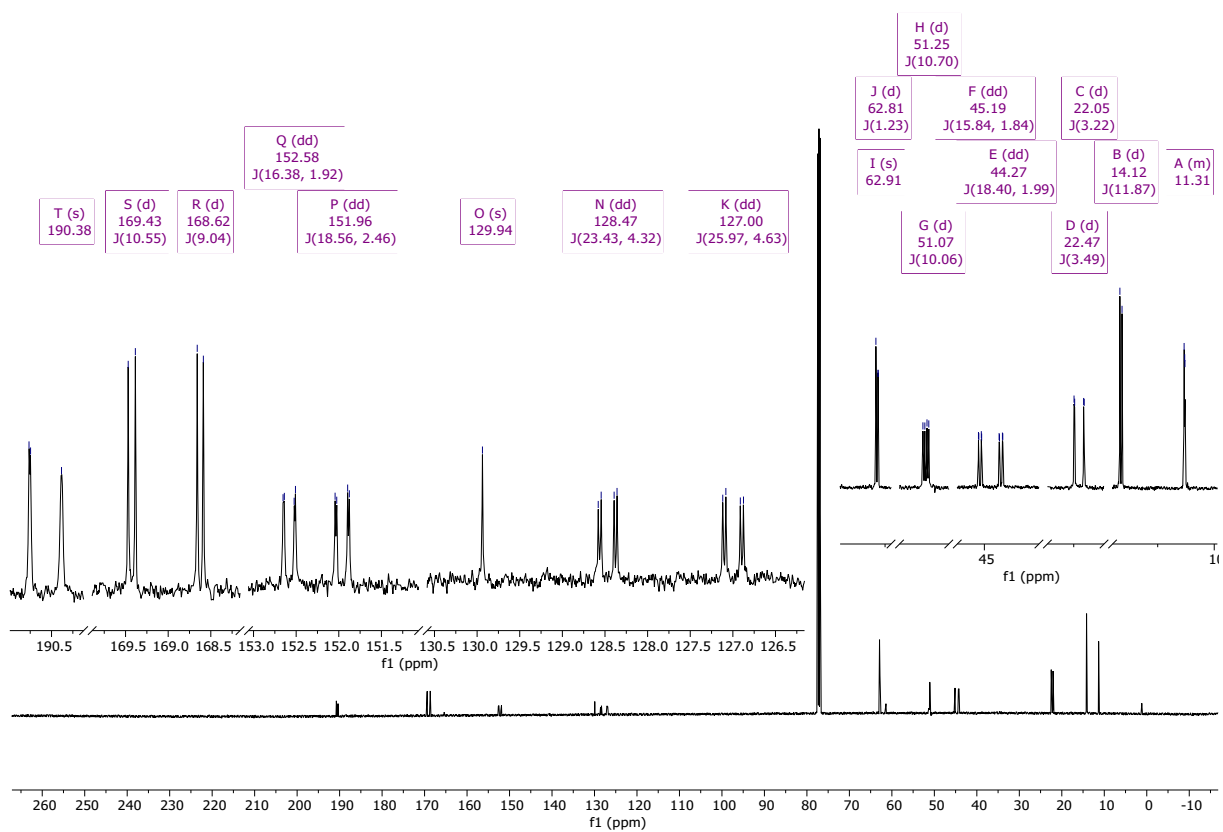

Fig. S20 <sup>13</sup>C NMR spectrum of 4a in C<sub>6</sub>D<sub>6</sub>.

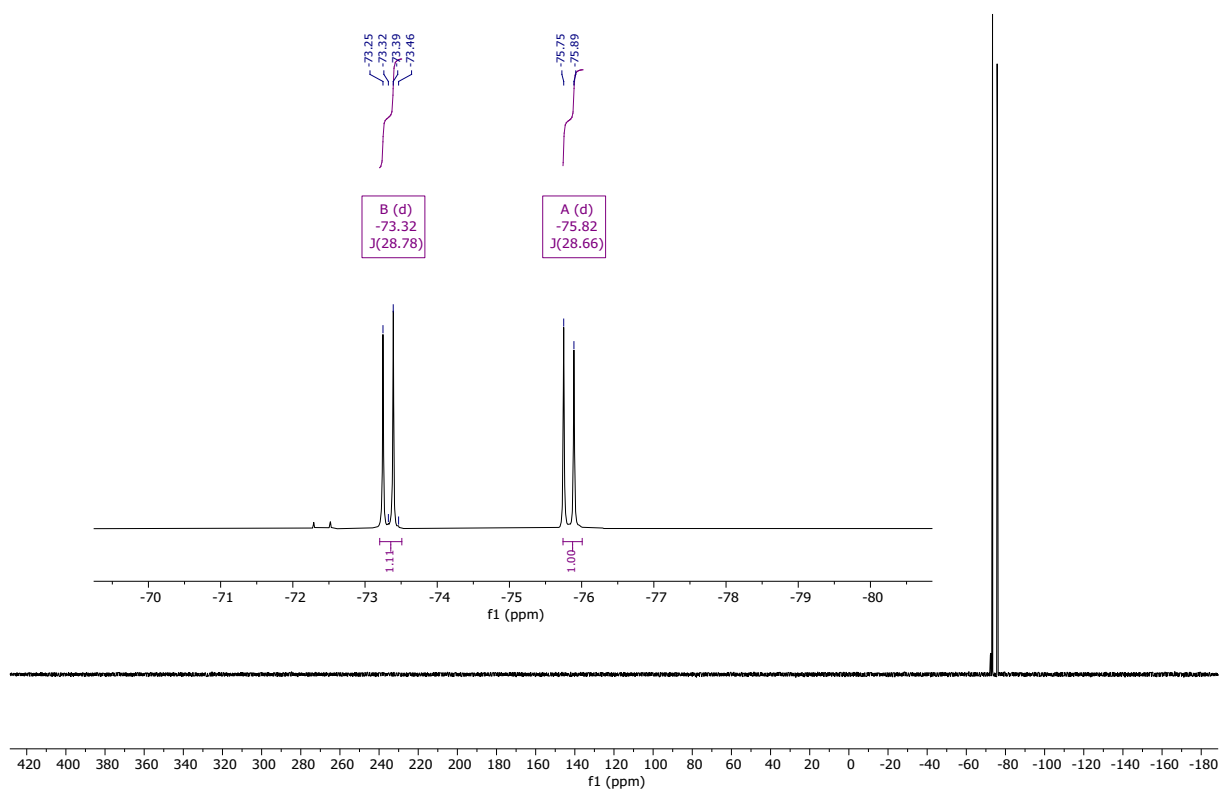

**Fig. S21**  $^{31}\text{P}\{^1\text{H}\}$  NMR spectrum of **4a** in  $\text{CDCl}_3$ .

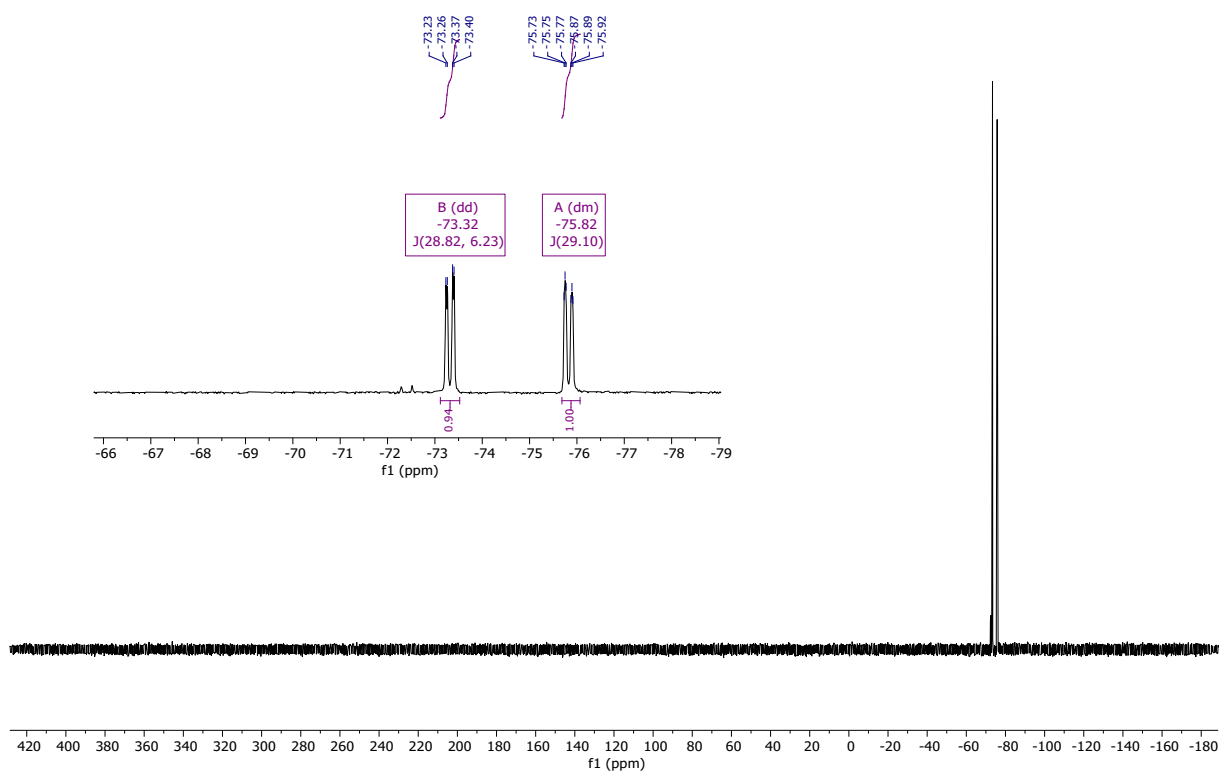

**Fig. S22**  $^{31}\text{P}$  NMR spectrum of **4a** in  $\text{CDCl}_3$ .

3.7 4a'

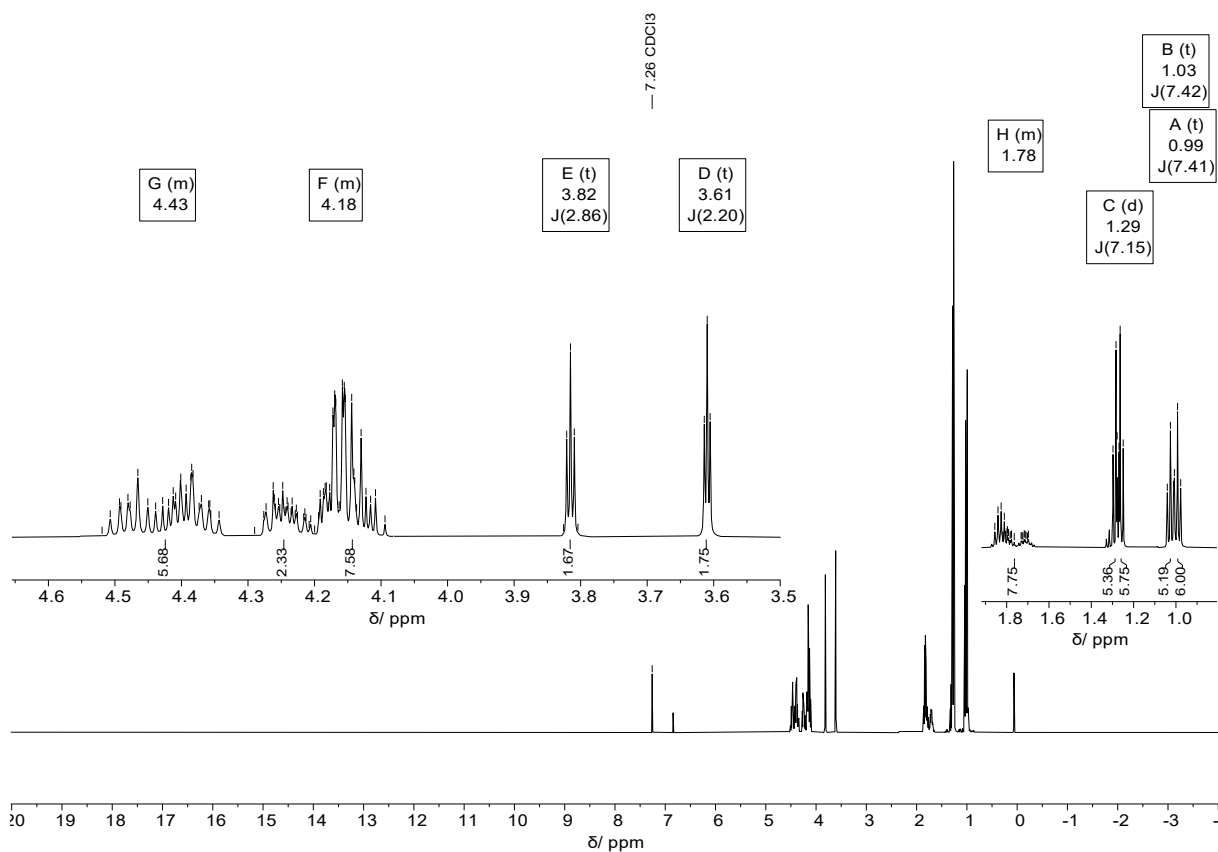

Fig. S23 <sup>1</sup>H NMR spectrum of 4a' in CDCl<sub>3</sub>.

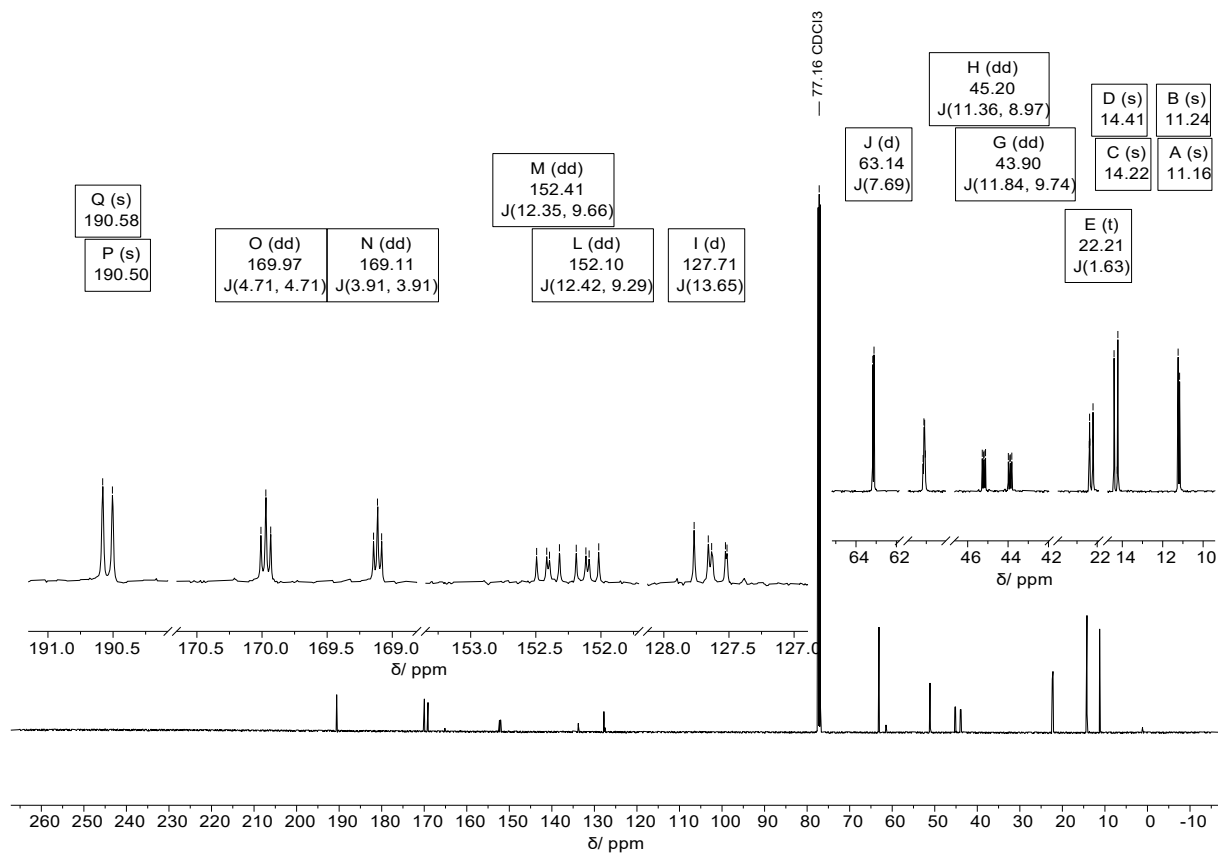

Fig. S24 <sup>13</sup>C NMR spectrum of 4a' in CDCl<sub>3</sub>.

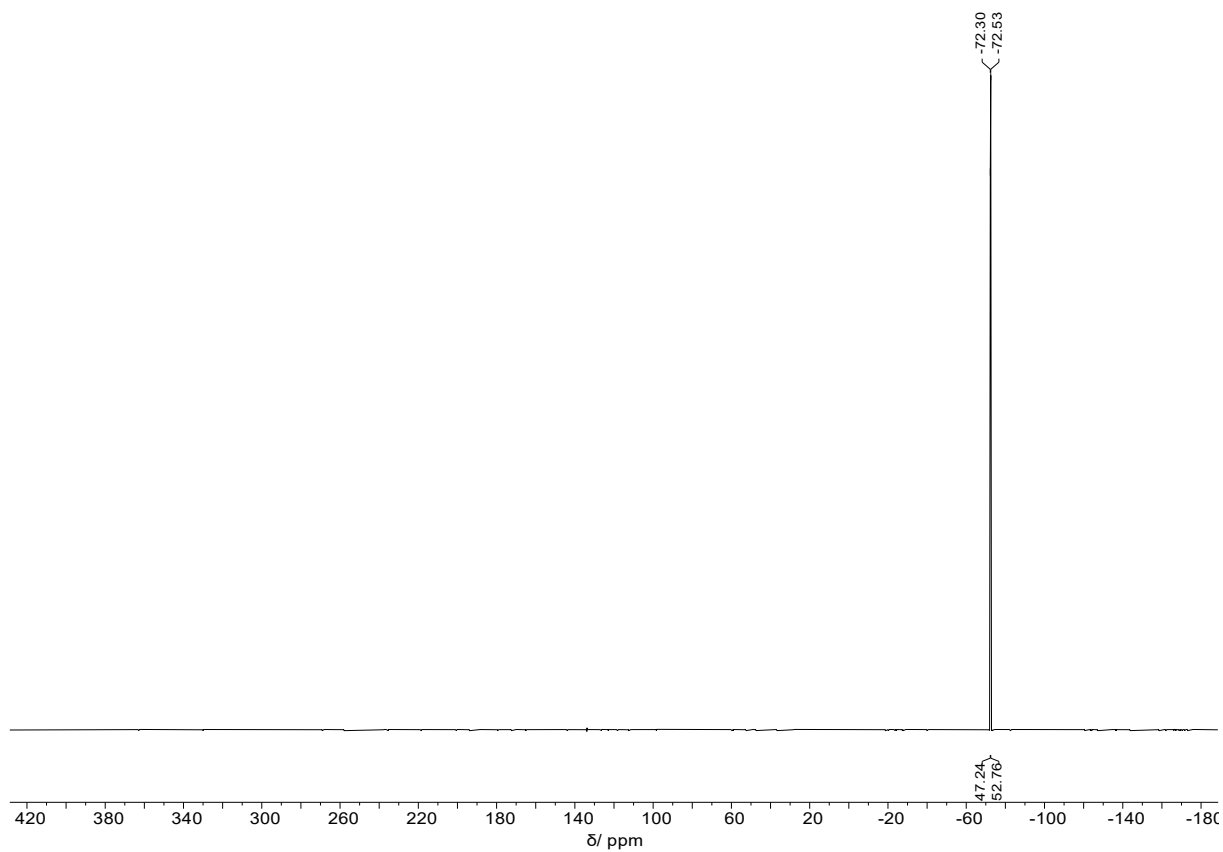

**Fig. S25** <sup>31</sup>P{<sup>1</sup>H} NMR spectrum of **4a'** in CDCl<sub>3</sub>.

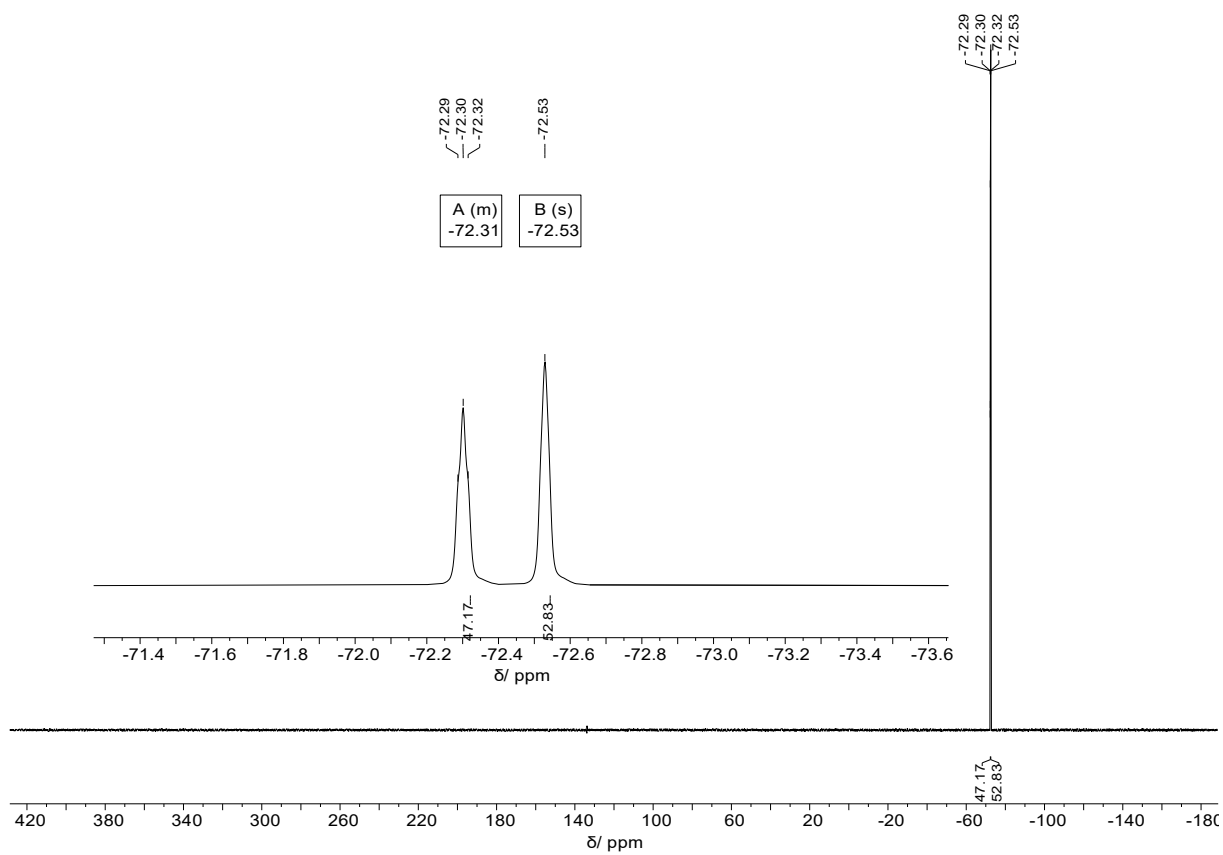

**Fig. S26** <sup>31</sup>P NMR spectrum of **4b** in CDCl<sub>3</sub>.

## 3.8 4b

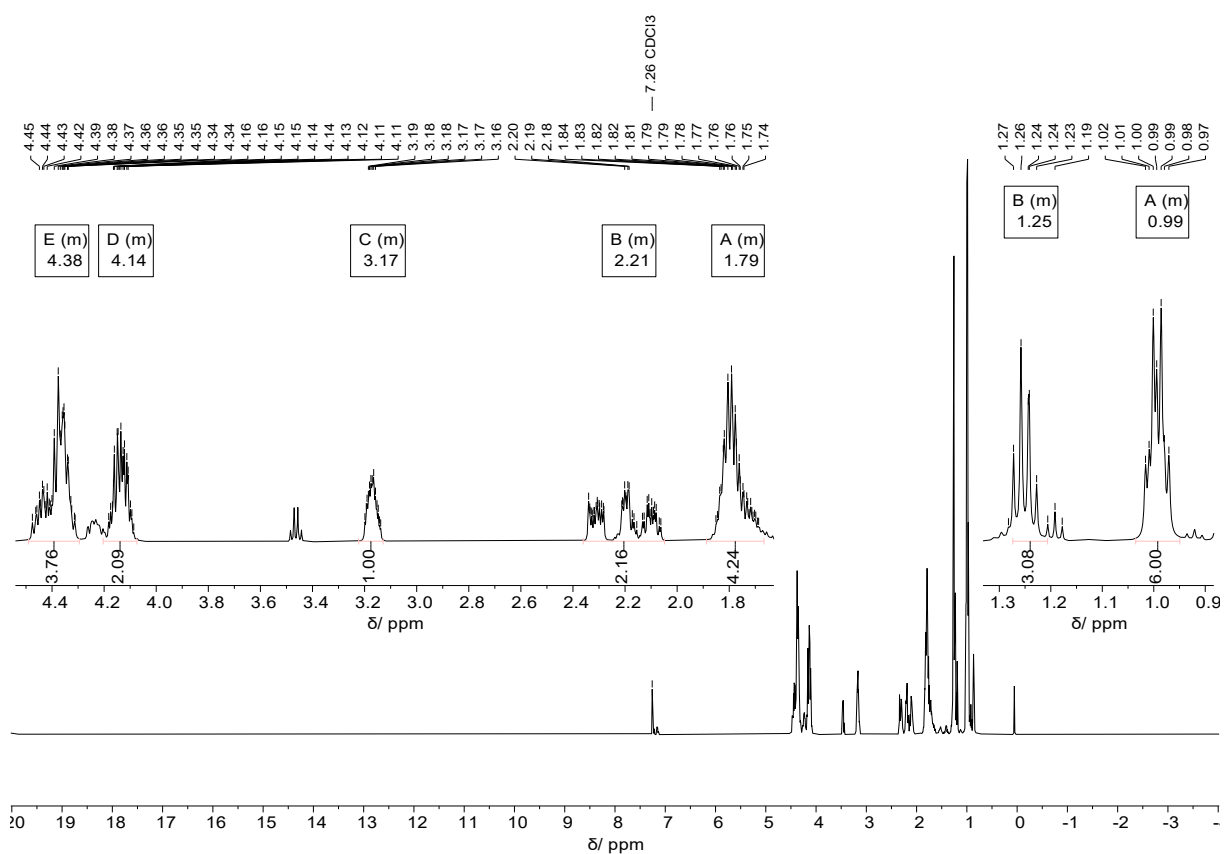Fig. S27 <sup>1</sup>H NMR spectrum of **4b** in CDCl<sub>3</sub>.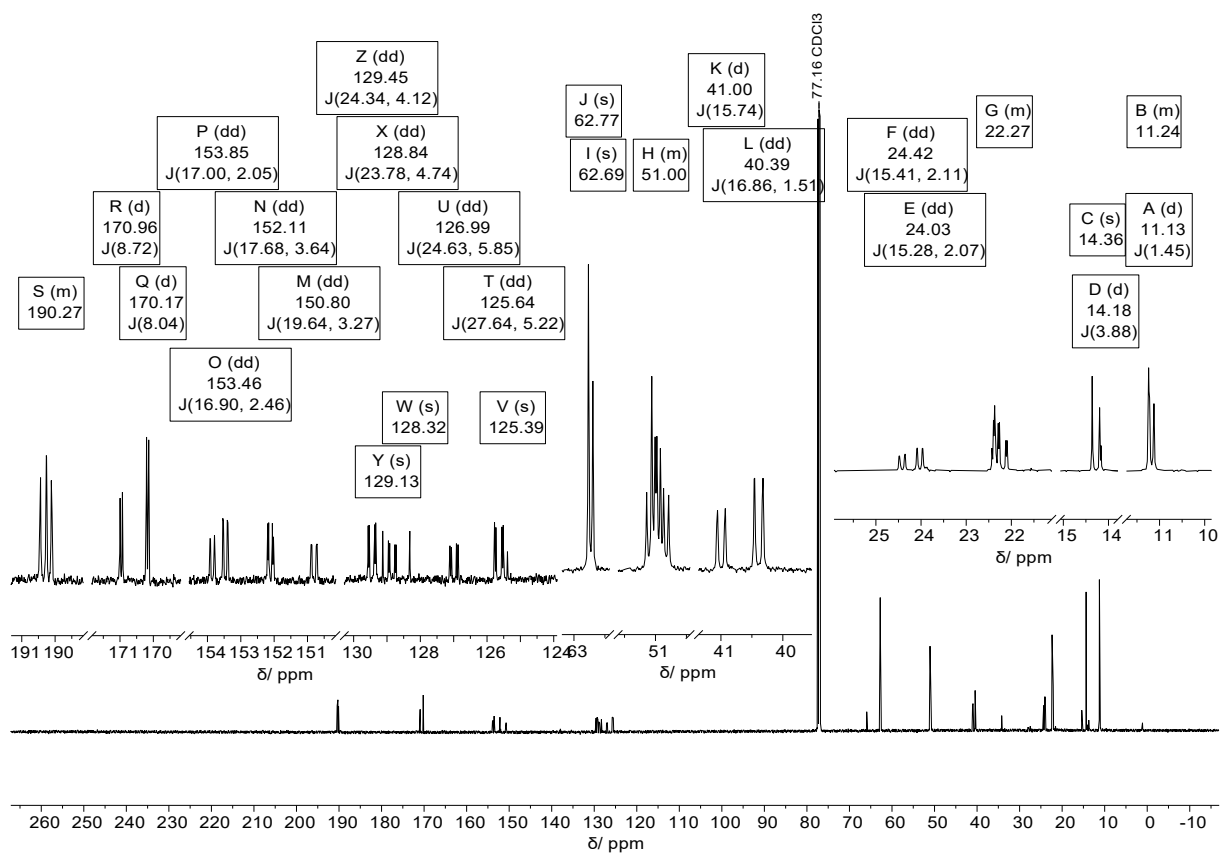Fig. S28 <sup>13</sup>C NMR spectrum of **4b** in CDCl<sub>3</sub>.

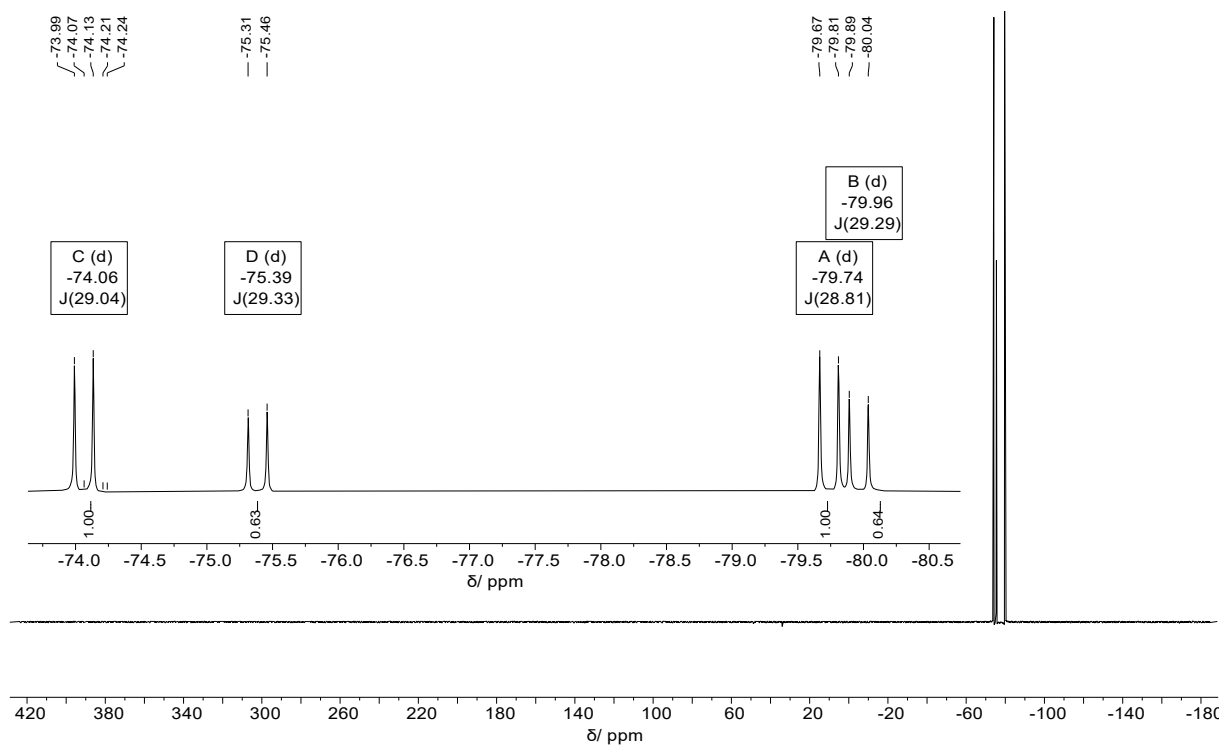

Fig. S29  $^{31}\text{P}\{^1\text{H}\}$  NMR spectrum of **4b** in  $\text{CDCl}_3$ .

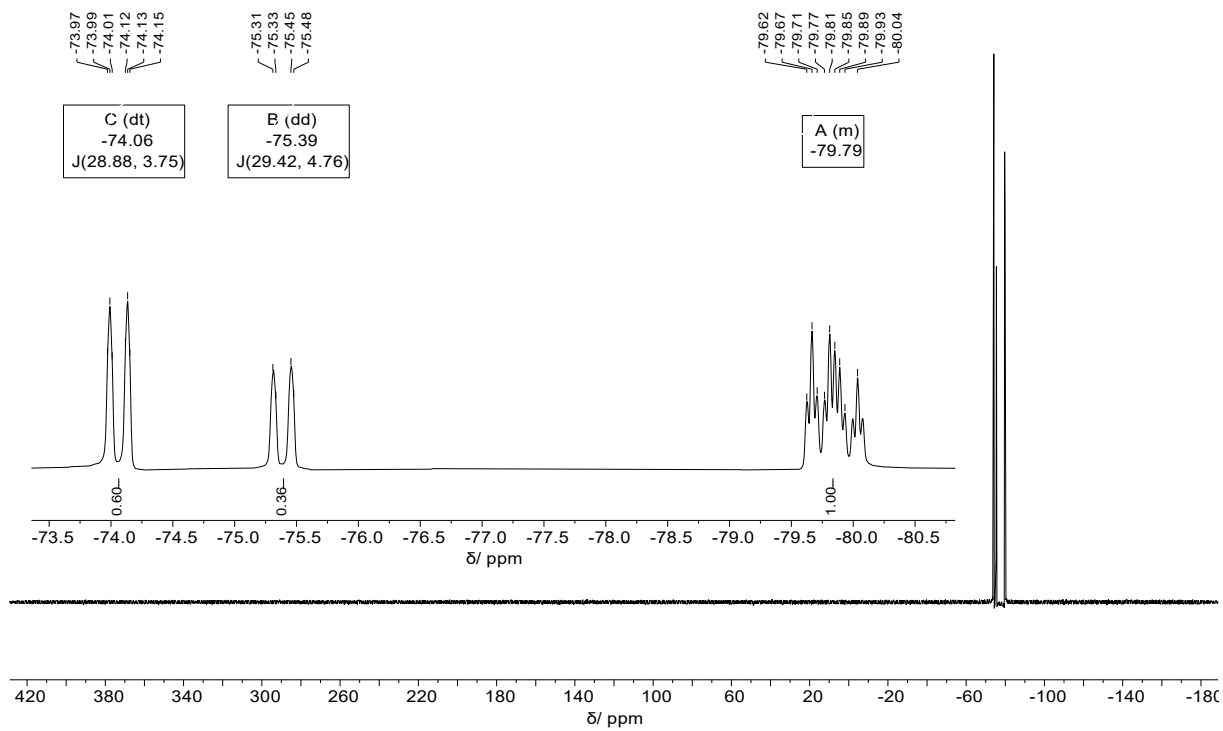

Fig. S30  $^{31}\text{P}$  NMR spectrum of **4b** in  $\text{CDCl}_3$ .

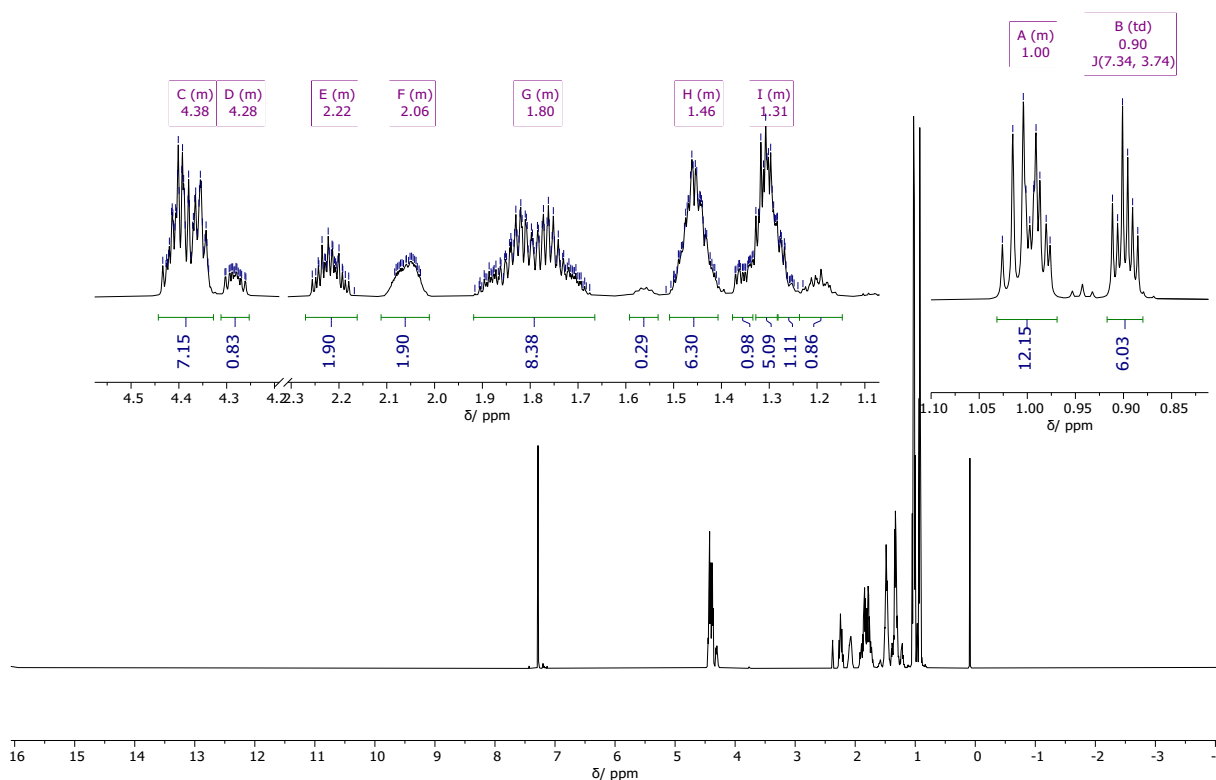Fig. S31 <sup>1</sup>H NMR spectrum of 4c in CDCl<sub>3</sub>.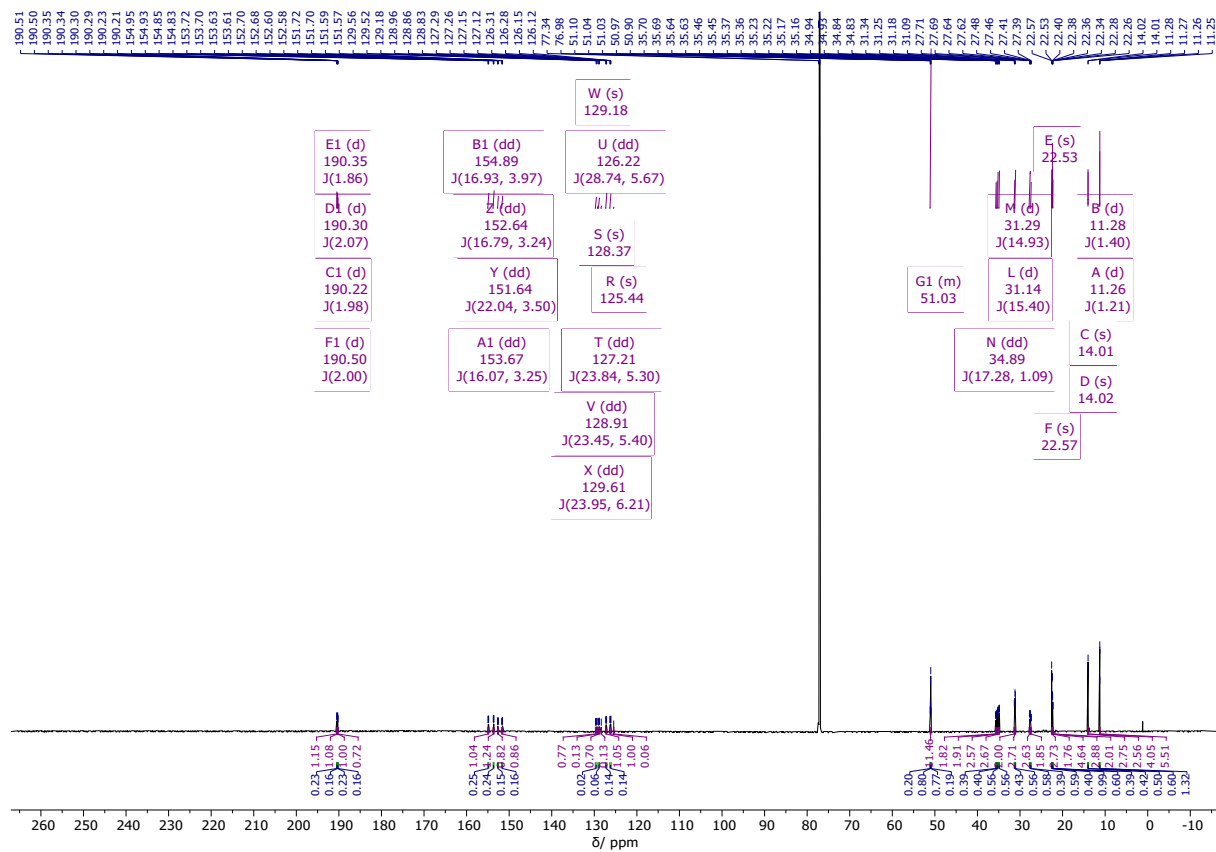Fig. S32 <sup>13</sup>C NMR spectrum of 4c in CDCl<sub>3</sub>, for a detailed image see next figures.



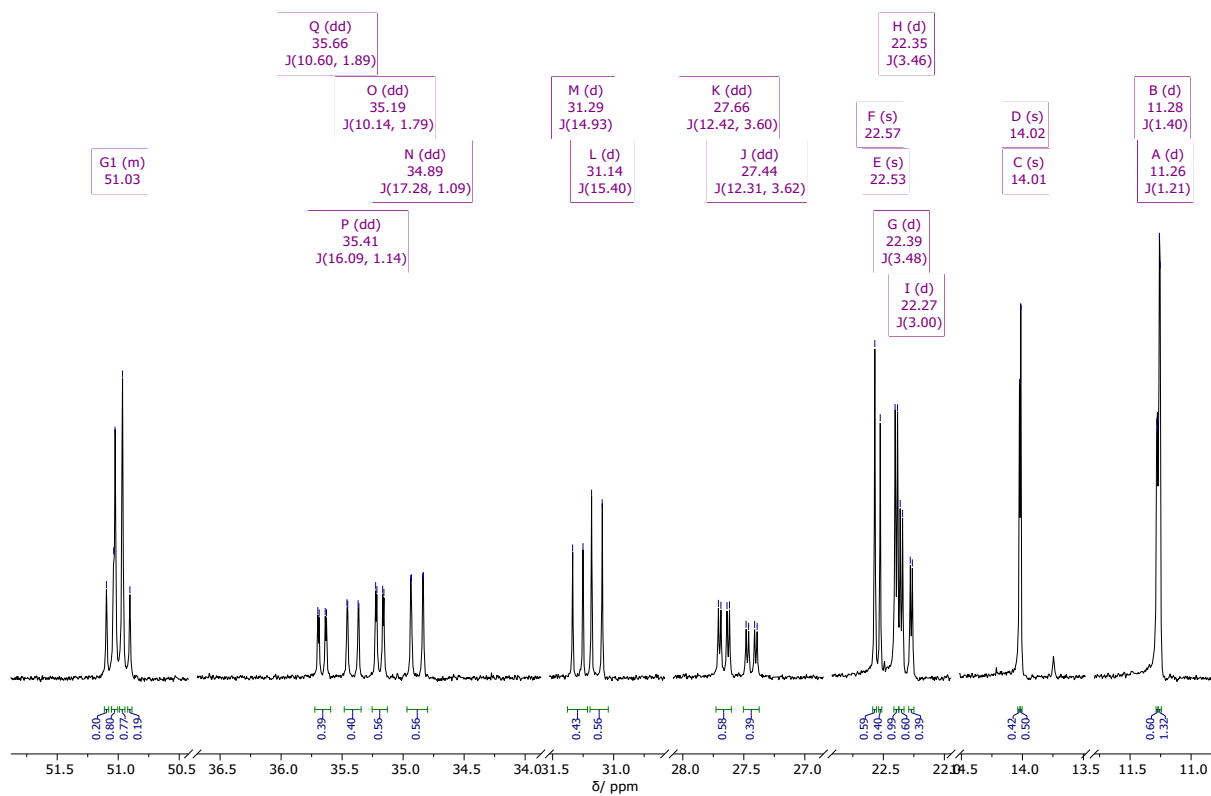

Fig. S33 Part of the  $^{13}\text{C}$  NMR spectrum of **4c** in  $\text{CDCl}_3$ .

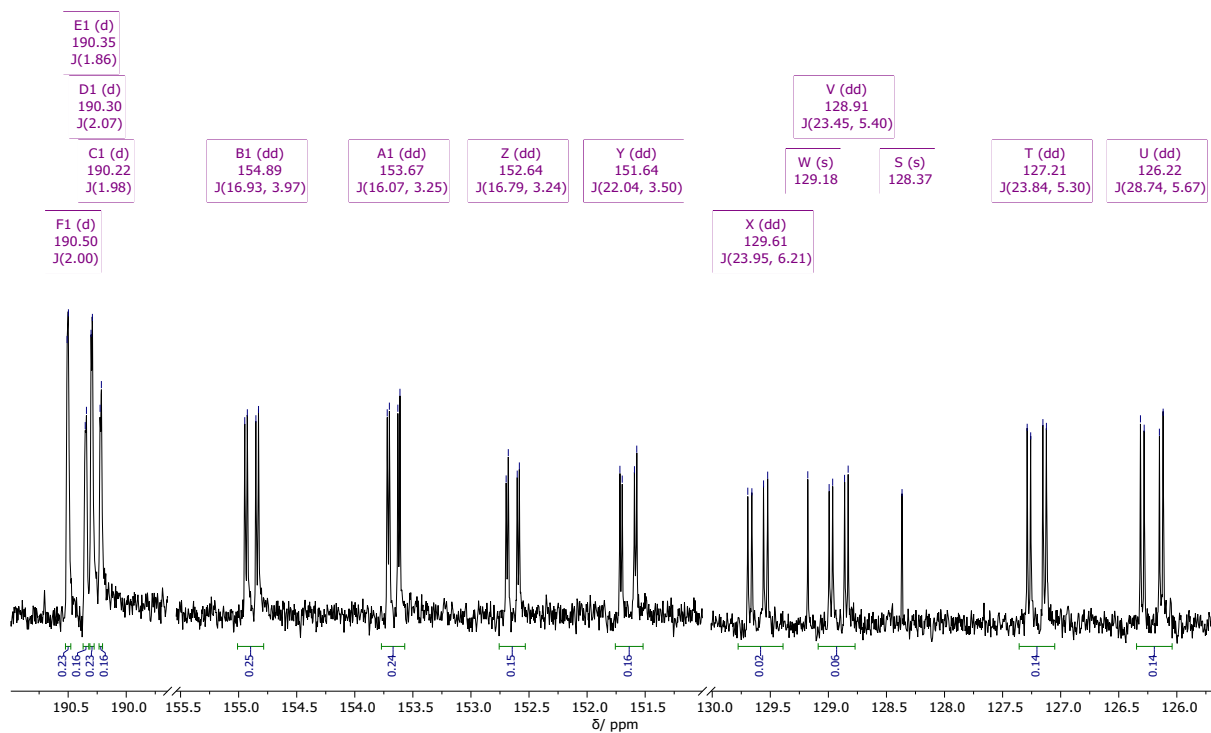

Fig. S34 Part of the  $^{13}\text{C}$  NMR spectrum of **4c** in  $\text{CDCl}_3$ .

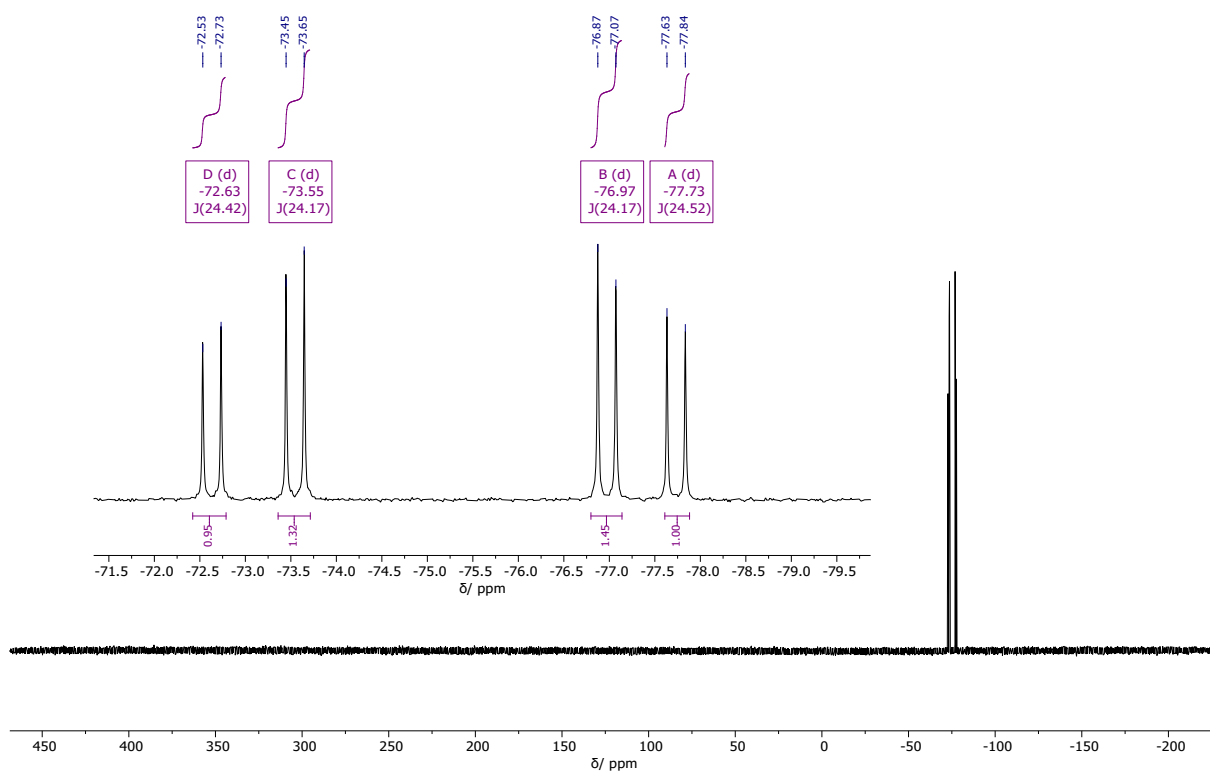

Fig. S35  $^{31}\text{P}\{^1\text{H}\}$  NMR spectrum of **4c** in  $\text{CDCl}_3$ .

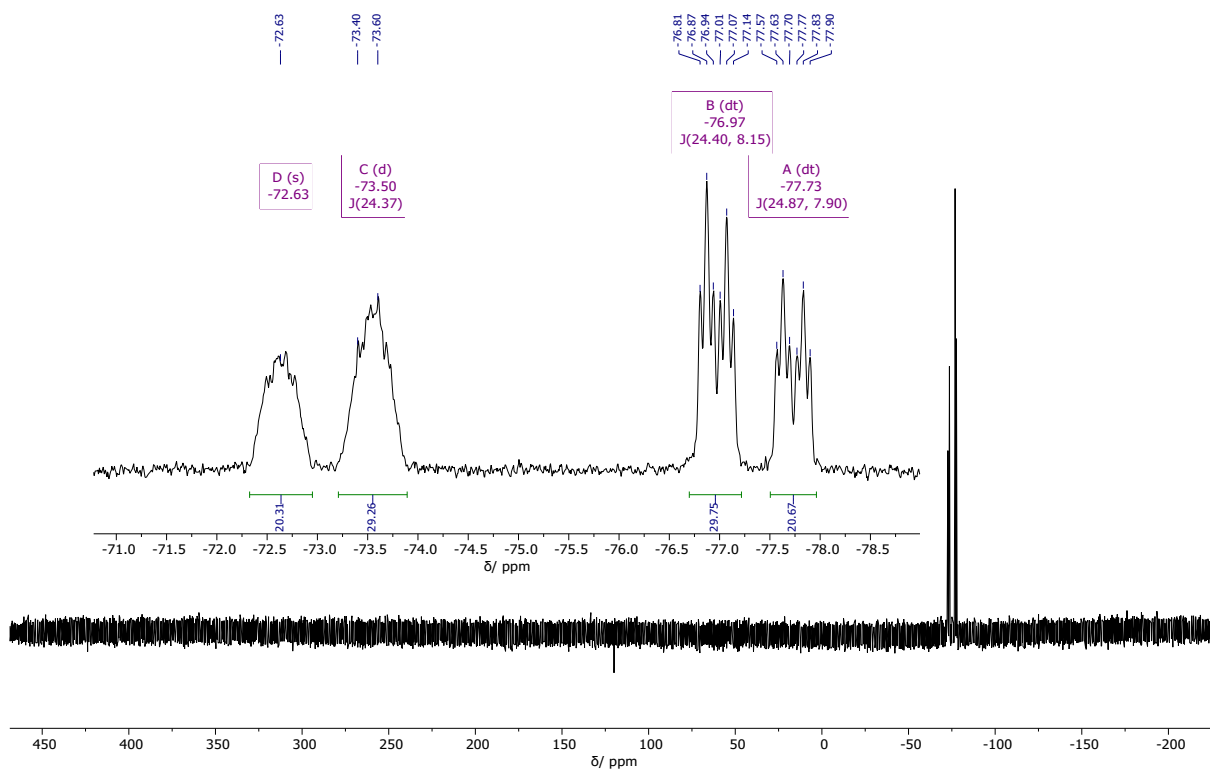

Fig. S36  $^{31}\text{P}$  NMR spectrum of **4c** in  $\text{CDCl}_3$ .

3.10 4d

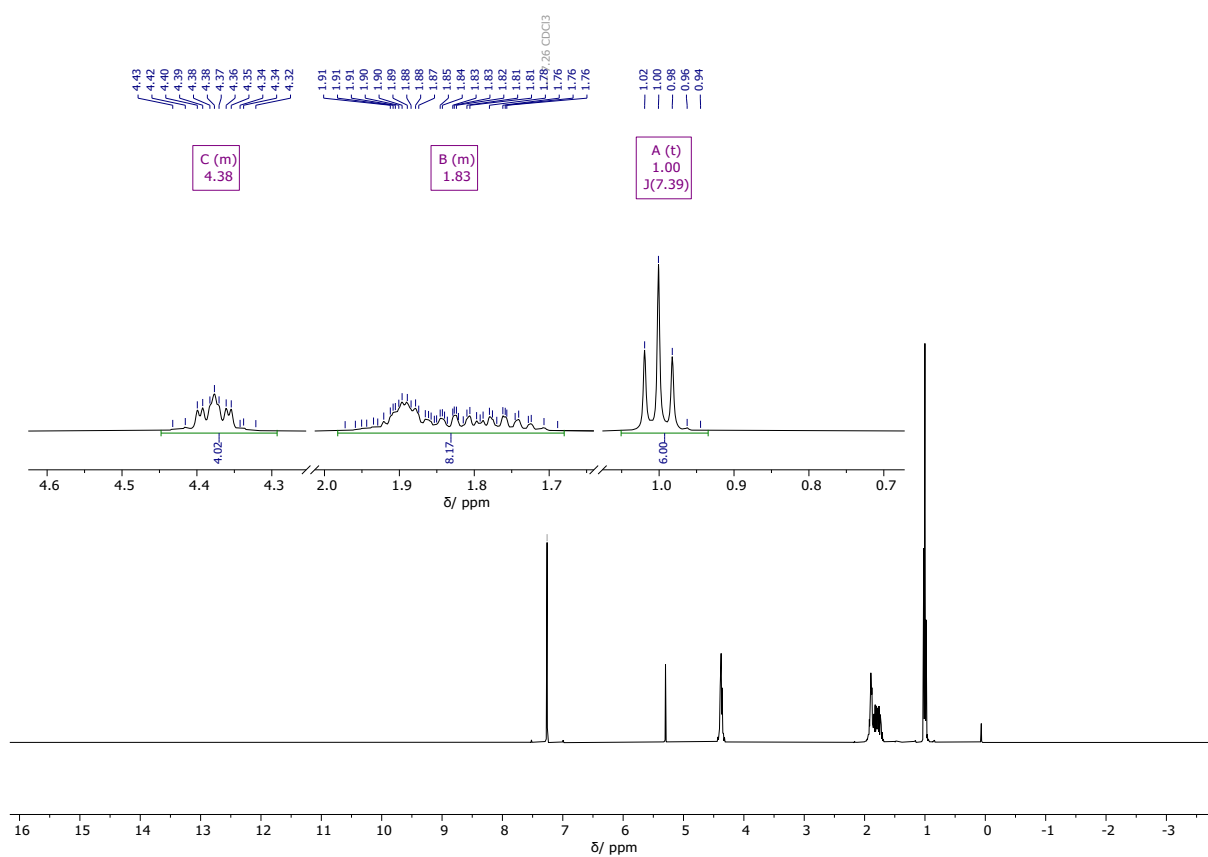

Fig. S37 <sup>1</sup>H NMR spectrum of 4d in CDCl<sub>3</sub>.

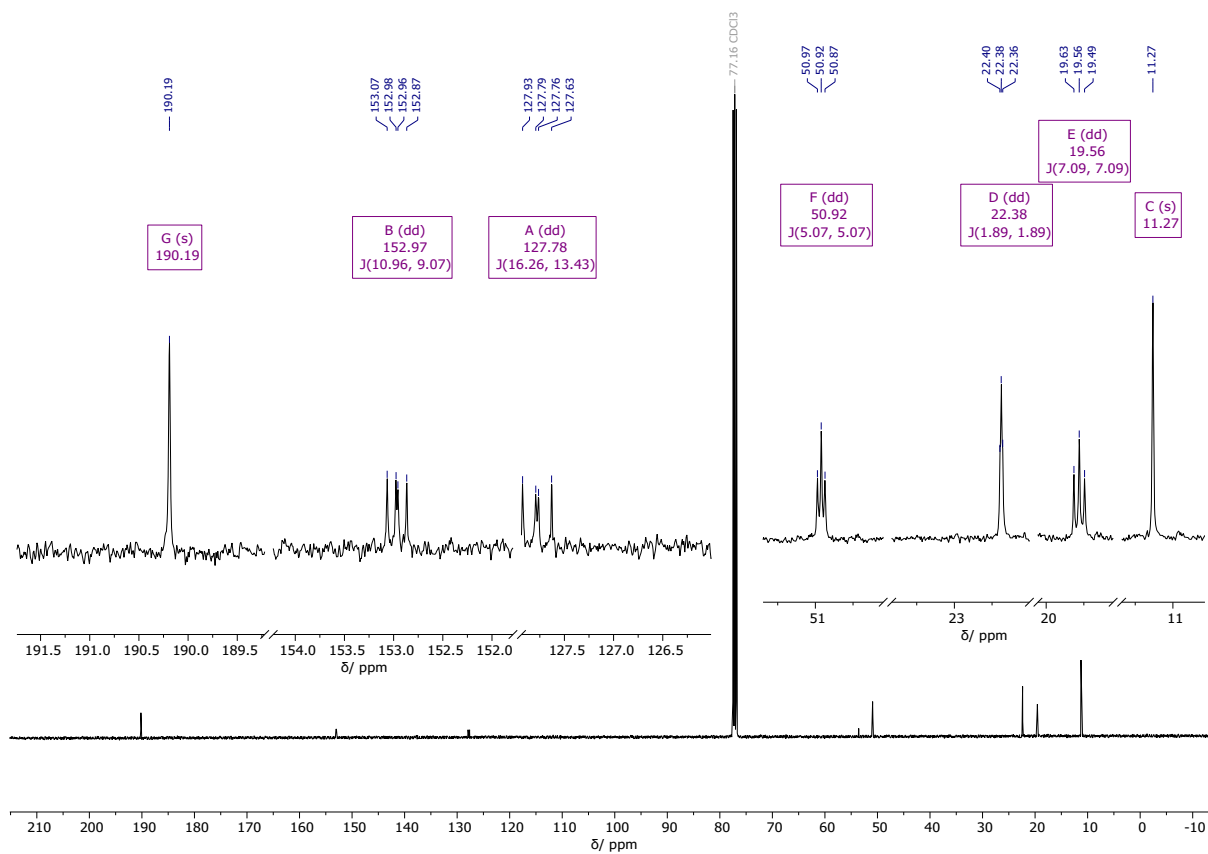

Fig. S38 <sup>13</sup>C NMR spectrum of 4d in CDCl<sub>3</sub>.

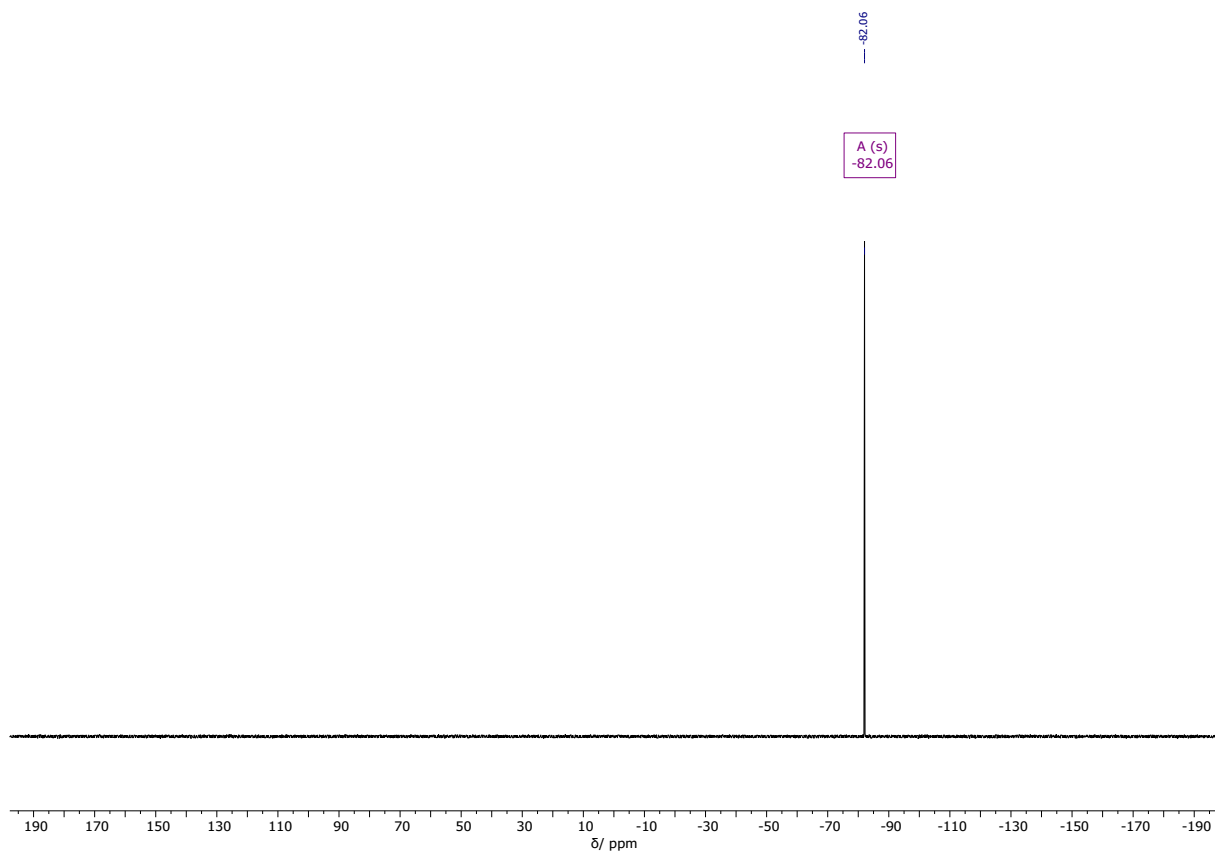

**Fig. S39** <sup>31</sup>P{<sup>1</sup>H} NMR spectrum of **4d** in CDCl<sub>3</sub>.

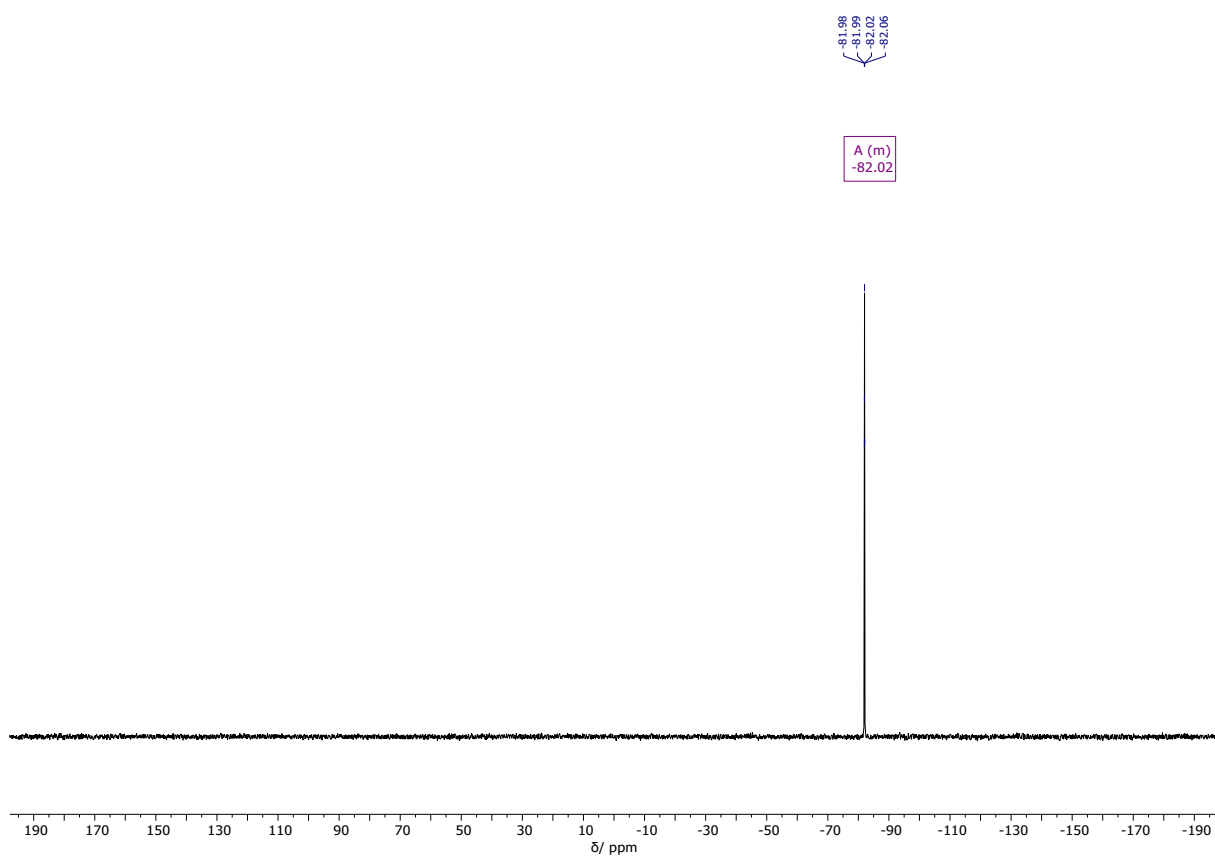

**Fig. S40** <sup>31</sup>P NMR spectrum of **4d** in CDCl<sub>3</sub>.

3.11 4e

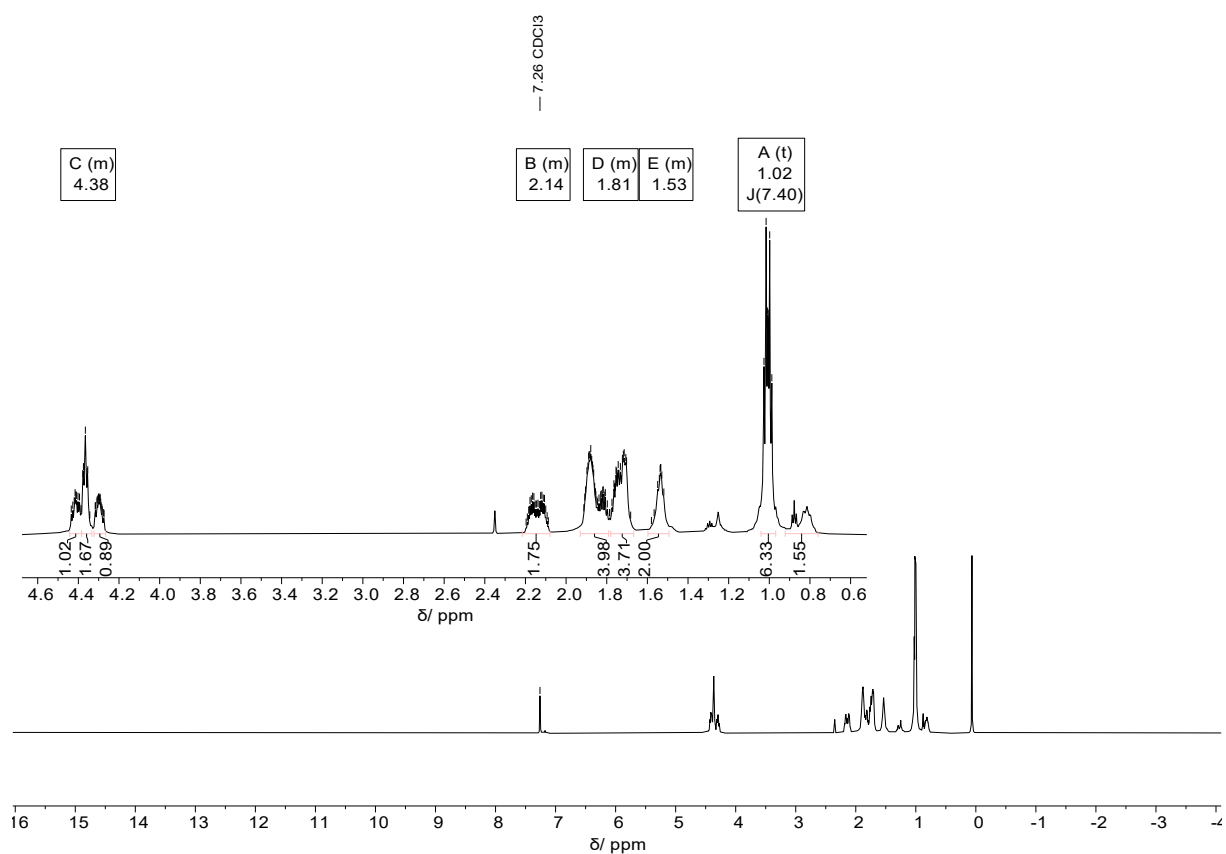

Fig. S41 <sup>1</sup>H NMR spectrum of 4e in CDCl<sub>3</sub>.

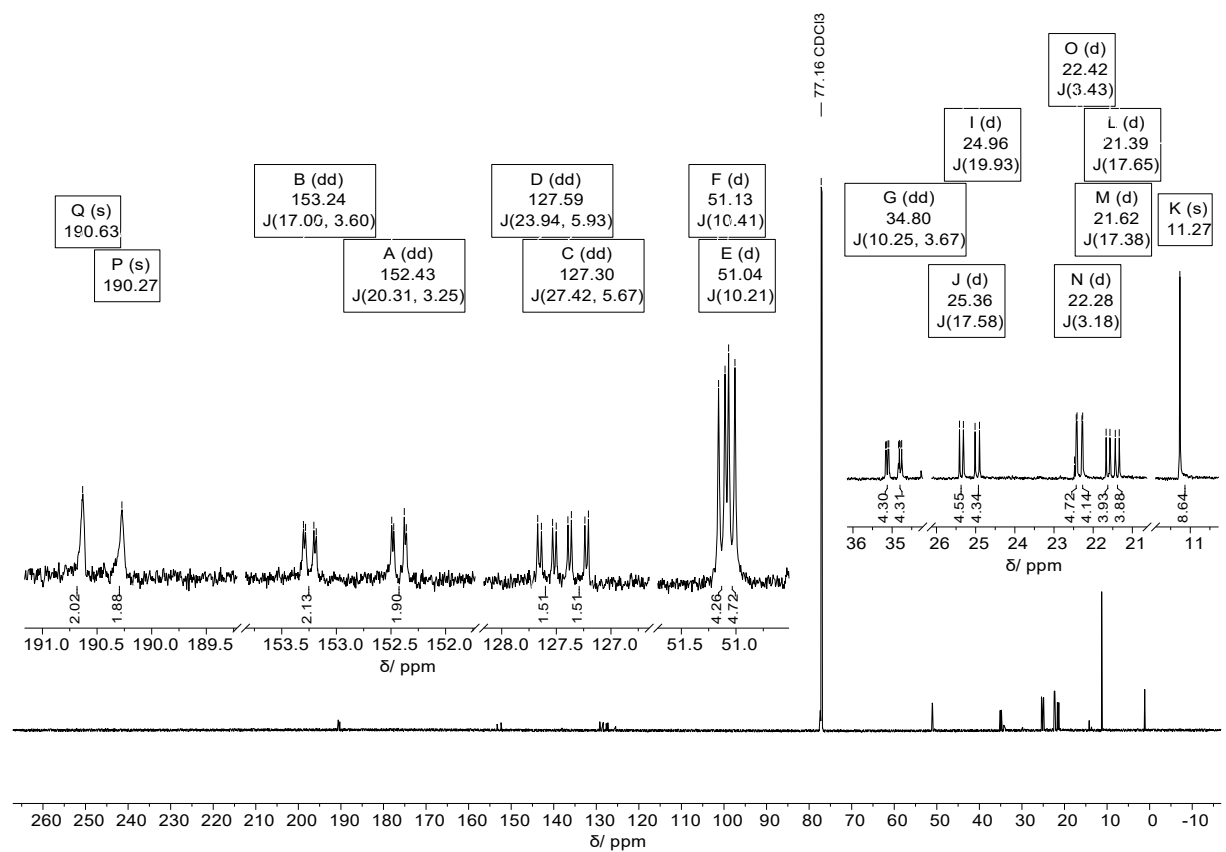

Fig. S42 <sup>13</sup>C NMR spectrum of 4e in CDCl<sub>3</sub>.

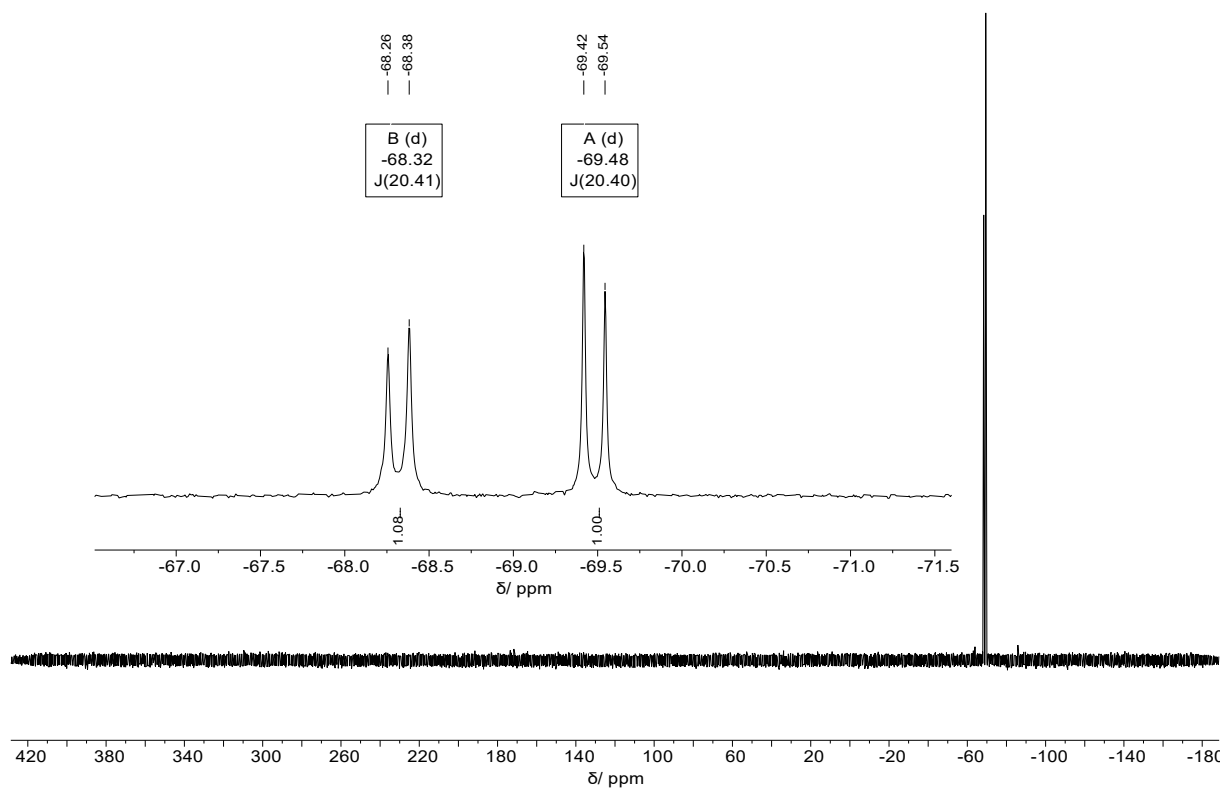

Fig. S43  $^{31}\text{P}\{^1\text{H}\}$  NMR spectrum of **4e** in  $\text{CDCl}_3$ .

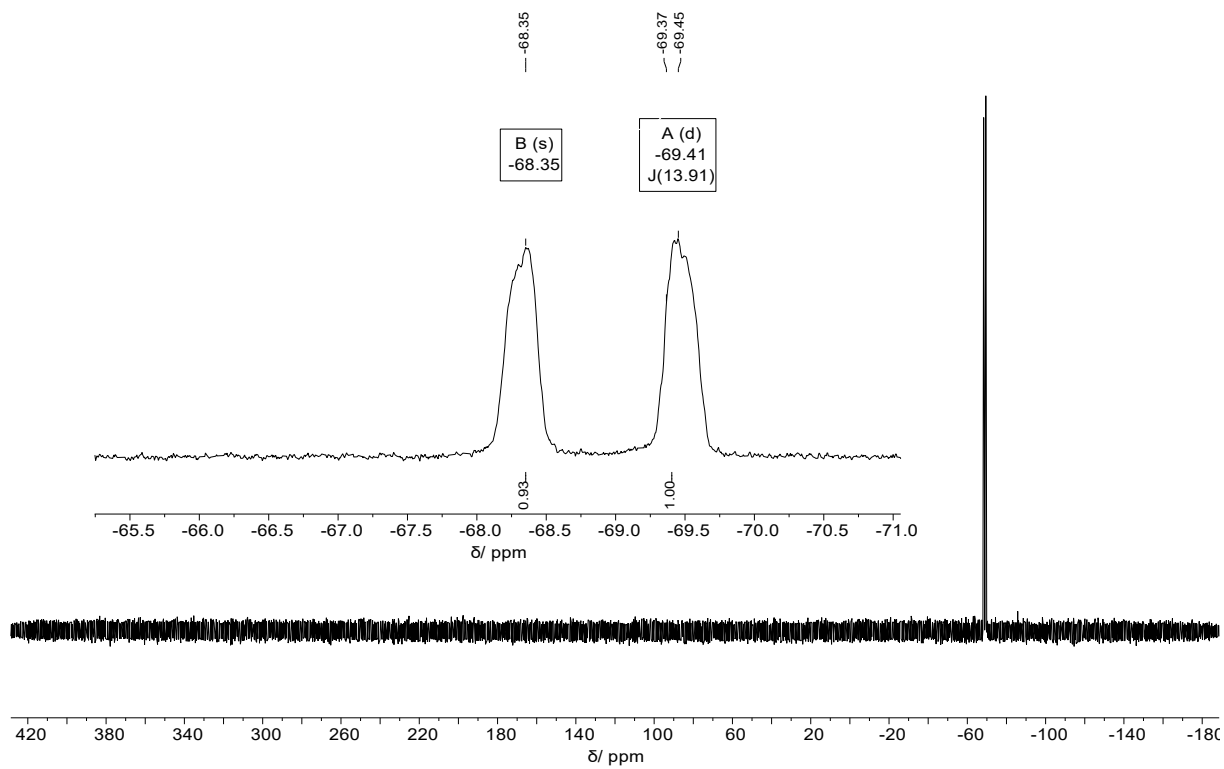

Fig. S44  $^{31}\text{P}$  NMR spectrum of **4e** in  $\text{CDCl}_3$ .

3.12 4f

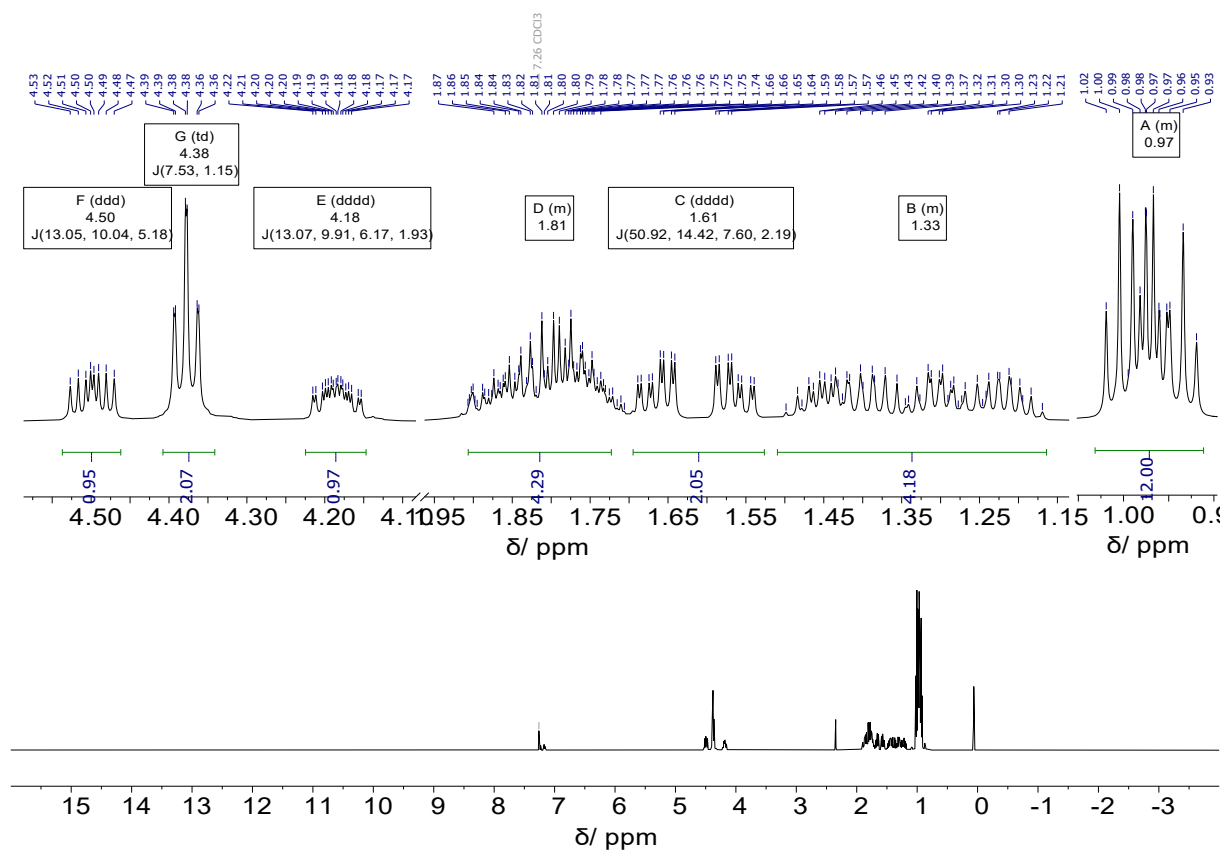

Fig. S45 <sup>1</sup>H NMR spectrum of 4f in CDCl<sub>3</sub>.

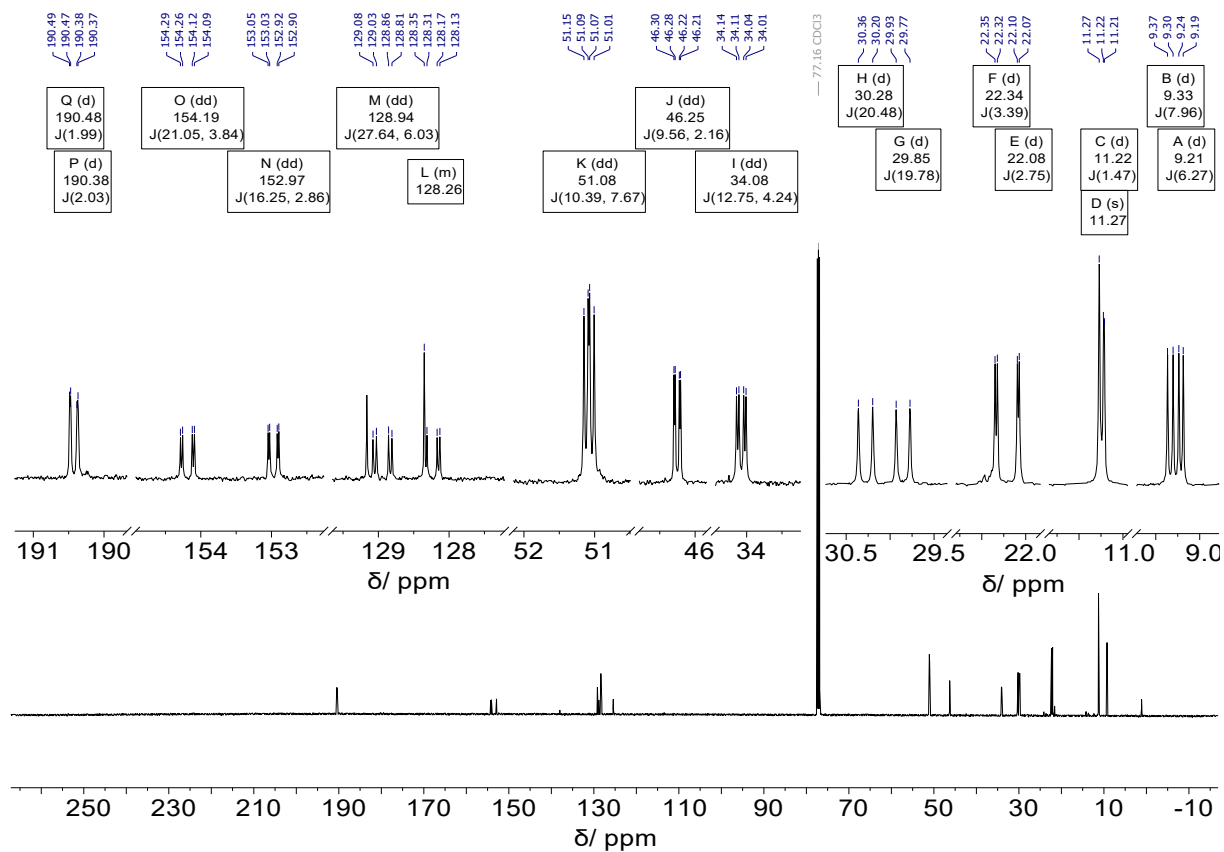

Fig. S46 <sup>13</sup>C NMR spectrum of 4f in CDCl<sub>3</sub>.

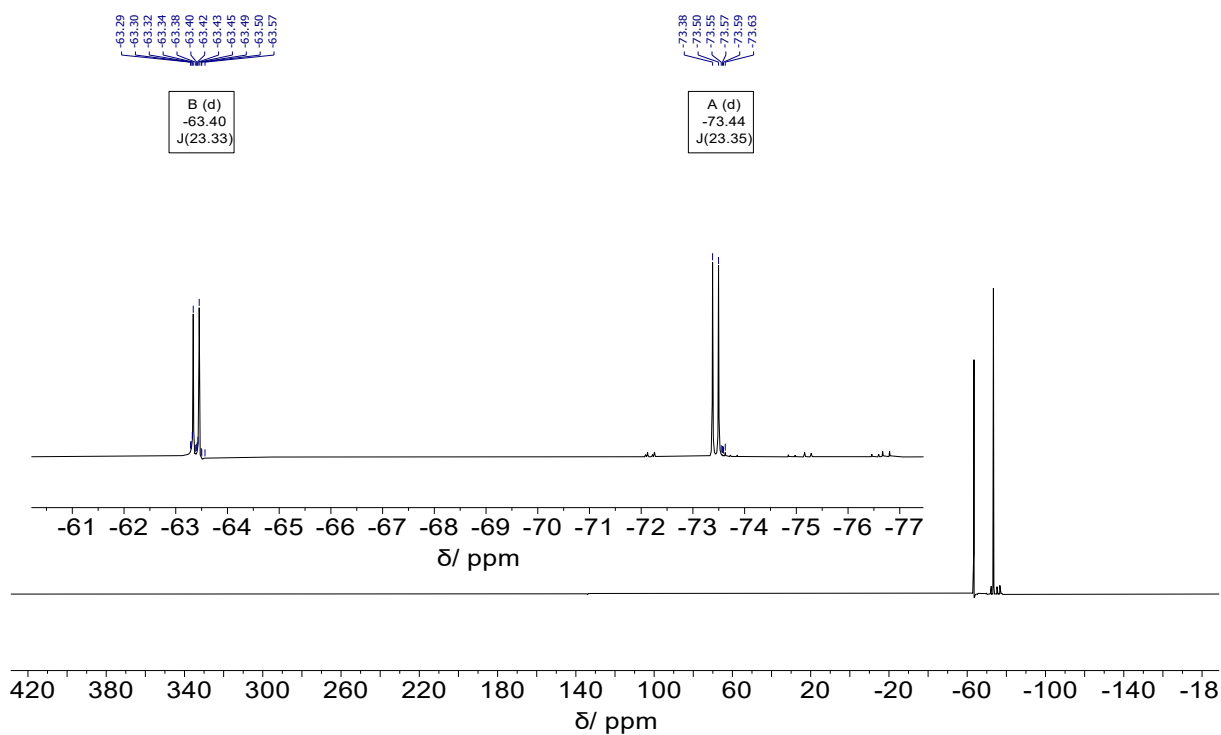

Fig. S47  $^{31}\text{P}\{^1\text{H}\}$  NMR spectrum of **4f** in  $\text{CDCl}_3$ .

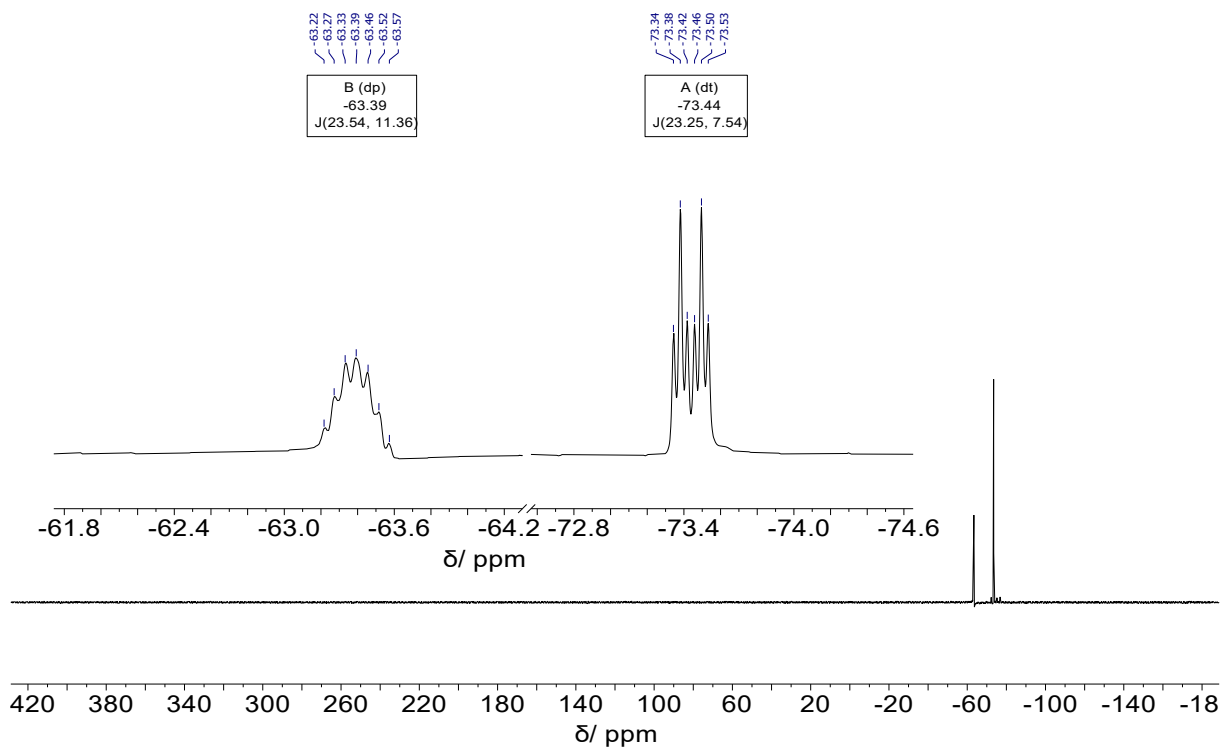

Fig. S48  $^{31}\text{P}$  NMR spectrum of **4f** in  $\text{CDCl}_3$ .



### 3.13 $^{31}\text{P}\{^1\text{H}\}$ NMR spectrum of **4c** at 100 °C

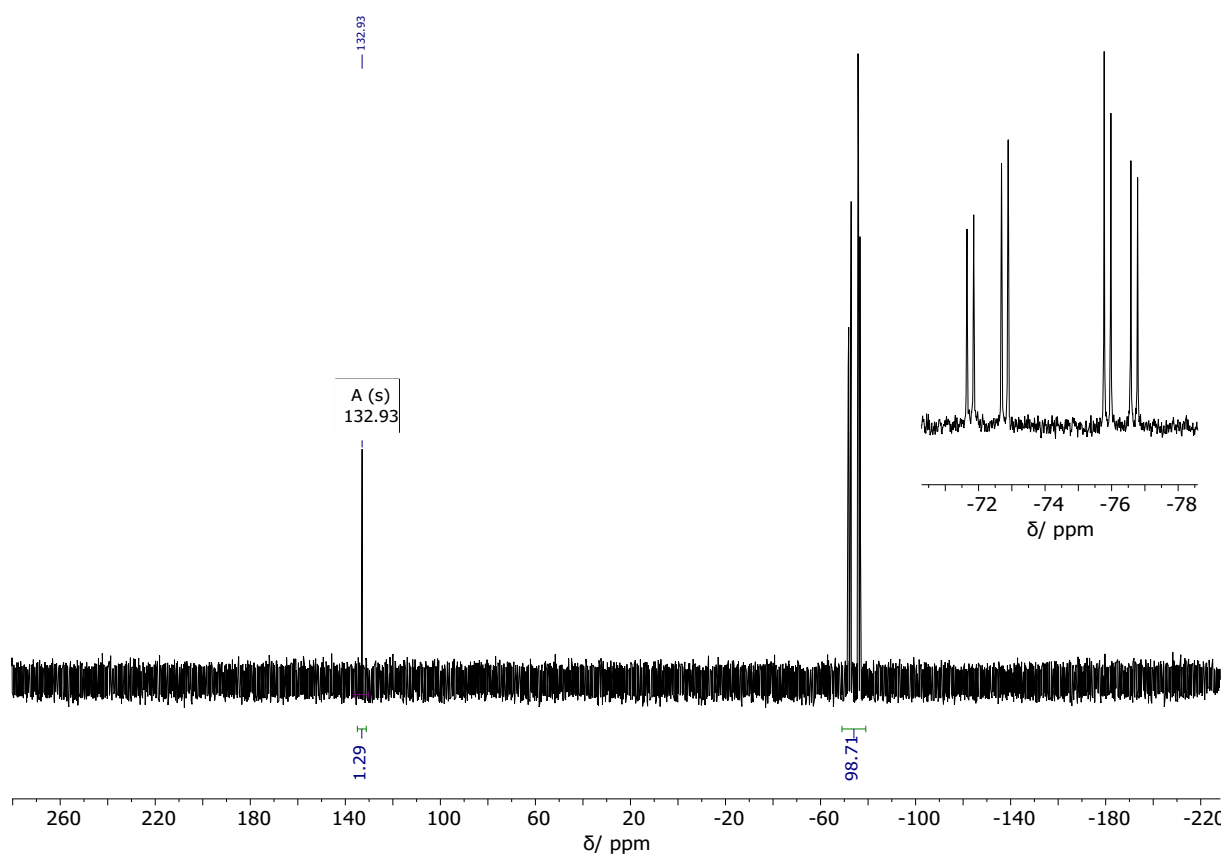

**Fig. S49**  $^{31}\text{P}\{^1\text{H}\}$  NMR spectrum of **4c** in toluene at 100 °C.

## 4 Singel crystal X-ray diffraction studies

### 4.1 **3c**

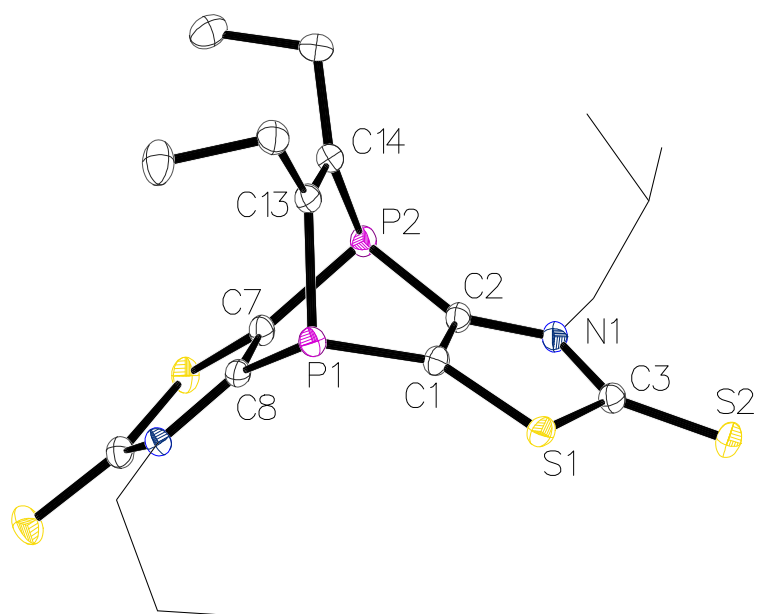

**Fig S50:** Molecular structure of **3c** in the single crystal lattice at 100 K. Thermal ellipsoids are set at 50% probability level. Hydrogen atoms were omitted and N-*n*-propyl groups are shown as wire-frames for clarity.

**Table S1:** Crystal data and structure refinement for **3c**.

|                                            |                                                                              |
|--------------------------------------------|------------------------------------------------------------------------------|
| CCDC Deposition Number                     | 2366202                                                                      |
| Crystal Habitus                            | clear colourless block                                                       |
| Device Type                                | Bruker D8 Venture                                                            |
| Empirical formula                          | C <sub>18</sub> H <sub>24</sub> N <sub>2</sub> P <sub>2</sub> S <sub>4</sub> |
| Moiety formula                             | C <sub>18</sub> H <sub>24</sub> N <sub>2</sub> P <sub>2</sub> S <sub>4</sub> |
| Formula weight / g/mol                     | 458.57                                                                       |
| T / K                                      | 100                                                                          |
| Crystal system                             | triclinic                                                                    |
| Space group                                | $P\bar{1}$                                                                   |
| a / Å                                      | 7.2842(5)                                                                    |
| b / Å                                      | 9.9259(6)                                                                    |
| c / Å                                      | 15.0111(9)                                                                   |
| $\alpha$ / °                               | 94.948(3)                                                                    |
| $\beta$ / °                                | 94.001(3)                                                                    |
| $\gamma$ / °                               | 96.798(3)                                                                    |
| V / Å <sup>3</sup>                         | 1070.17(12)                                                                  |
| Z                                          | 2                                                                            |
| $\rho_{\text{calc}}$ / g/cm <sup>3</sup>   | 1.423                                                                        |
| $\mu$ / mm <sup>-1</sup>                   | 0.600                                                                        |
| F(000)                                     | 480.0                                                                        |
| Crystal size / mm <sup>3</sup>             | 0.24 × 0.22 × 0.1                                                            |
| Absorption correction                      | empirical                                                                    |
| T <sub>min</sub> ; T <sub>max</sub>        | 0.6744; 0.7460                                                               |
| Radiation                                  | MoK $\alpha$ ( $\lambda$ = 0.71073)                                          |
| 2 $\theta$ range for data collection / °   | 4.152 to 59.932°                                                             |
| Completeness to $\theta$                   | 0.996                                                                        |
| Index ranges                               | -10 ≤ h ≤ 10, -13 ≤ k ≤ 13, -21 ≤ l ≤ 21                                     |
| Reflections collected                      | 20653                                                                        |
| Independent reflections                    | 6196 [R <sub>int</sub> = 0.0426, R <sub>sigma</sub> = 0.0400]                |
| Data/restraints/parameters                 | 6196/226/250                                                                 |
| Goodness-of-fit on F <sup>2</sup>          | 1.023                                                                        |
| Final R indexes (I ≥ 2 $\sigma$ (I))       | R <sub>1</sub> = 0.0297, $\omega$ R <sub>2</sub> = 0.0712                    |
| Final R indexes (all data)                 | R <sub>1</sub> = 0.0354, $\omega$ R <sub>2</sub> = 0.0747                    |
| Largest diff. peak/hole / e/Å <sup>3</sup> | 0.46/-0.28                                                                   |

**Table S2:** Bond lengths for **3c**.

| Atom | Atom | Length/Å   | Atom | Atom | Length/Å   |
|------|------|------------|------|------|------------|
| S1   | C1   | 1.7349(13) | N2   | C8   | 1.3886(16) |
| S1   | C3   | 1.7457(14) | N2   | C9   | 1.3673(16) |
| S2   | C3   | 1.6664(14) | N2   | C10  | 1.4674(16) |
| S3   | C7   | 1.7327(13) | C1   | C2   | 1.3491(18) |
| S3   | C9   | 1.7424(14) | C4   | C5   | 1.523(2)   |
| S4   | C9   | 1.6630(14) | C5   | C6   | 1.496(2)   |
| P1   | C1   | 1.8193(13) | C5   | C6A  | 1.496(3)   |
| P1   | C8   | 1.8458(13) | C7   | C8   | 1.3484(18) |
| P1   | C13  | 1.8682(14) | C10  | C11  | 1.5292(19) |
| P2   | C2   | 1.8493(13) | C11  | C12  | 1.524(2)   |
| P2   | C7   | 1.8177(14) | C13  | C14  | 1.338(2)   |
| P2   | C14  | 1.8713(14) | C13  | C15  | 1.5084(19) |
| N1   | C2   | 1.3907(16) | C14  | C17  | 1.5168(19) |
| N1   | C3   | 1.3687(17) | C15  | C16  | 1.534(2)   |
| N1   | C4   | 1.4717(17) | C17  | C18  | 1.529(2)   |

**Table S3:** Bond angles for **3c**.

| Atom | Atom | Atom | Angle/°  | Atom | Atom | Atom | Angle/°    |
|------|------|------|----------|------|------|------|------------|
| C1   | S1   | C3   | 92.21(6) | N1   | C4   | C5   | 112.61(11) |
| C7   | S3   | C9   | 92.43(6) | C6   | C5   | C4   | 115.06(13) |

|    |    |     |            |     |     |     |            |
|----|----|-----|------------|-----|-----|-----|------------|
| C1 | P1 | C8  | 94.52(6)   | C6A | C5  | C4  | 114.4(7)   |
| C1 | P1 | C13 | 96.19(6)   | S3  | C7  | P2  | 127.41(8)  |
| C8 | P1 | C13 | 96.01(6)   | C8  | C7  | S3  | 110.13(10) |
| C2 | P2 | C14 | 95.36(6)   | C8  | C7  | P2  | 122.45(10) |
| C7 | P2 | C2  | 95.05(6)   | N2  | C8  | P1  | 125.56(9)  |
| C7 | P2 | C14 | 96.35(6)   | C7  | C8  | P1  | 120.35(10) |
| C2 | N1 | C4  | 123.86(11) | C7  | C8  | N2  | 114.06(11) |
| C3 | N1 | C2  | 114.66(11) | S4  | C9  | S3  | 123.98(8)  |
| C3 | N1 | C4  | 121.48(11) | N2  | C9  | S3  | 108.71(9)  |
| C8 | N2 | C10 | 123.77(11) | N2  | C9  | S4  | 127.31(10) |
| C9 | N2 | C8  | 114.66(11) | N2  | C10 | C11 | 112.37(11) |
| C9 | N2 | C10 | 121.56(11) | C12 | C11 | C10 | 113.97(11) |
| S1 | C1 | P1  | 127.11(8)  | C14 | C13 | P1  | 121.03(10) |
| C2 | C1 | S1  | 110.41(10) | C14 | C13 | C15 | 125.63(13) |
| C2 | C1 | P1  | 122.45(10) | C15 | C13 | P1  | 113.28(10) |
| N1 | C2 | P2  | 125.90(10) | C13 | C14 | P2  | 120.71(10) |
| C1 | C2 | P2  | 120.21(10) | C13 | C14 | C17 | 124.86(13) |
| C1 | C2 | N1  | 113.89(11) | C17 | C14 | P2  | 113.93(10) |
| S2 | C3 | S1  | 123.45(8)  | C13 | C15 | C16 | 111.93(12) |
| N1 | C3 | S1  | 108.82(9)  | C14 | C17 | C18 | 109.37(12) |
| N1 | C3 | S2  | 127.72(11) |     |     |     |            |

#### 4.2 4f

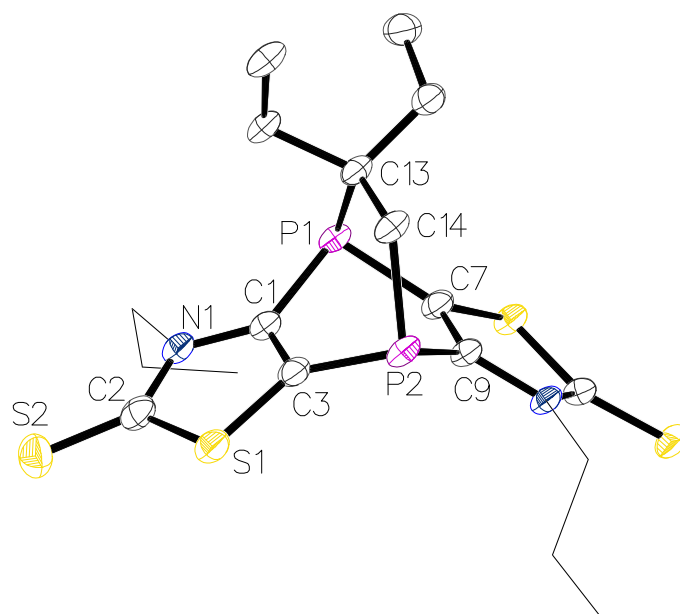

**Fig S51:** Molecular structure of **4f** in the single crystal lattice at 100 K. Thermal ellipsoids are set at 50% probability level. Hydrogen atoms were omitted and N-*n*-propyl groups are shown as wire-frames for clarity.

**Table S4:** Crystal data and structure refinement for **4f**.

|                        |                                                                              |
|------------------------|------------------------------------------------------------------------------|
| CCDC Deposition Number | 2366203                                                                      |
| Crystal Habitus        | clear colourless plank                                                       |
| Device Type            | STOE Stadivari                                                               |
| Empirical formula      | C <sub>18</sub> H <sub>26</sub> N <sub>2</sub> P <sub>2</sub> S <sub>4</sub> |
| Moiety formula         |                                                                              |
| Formula weight / g/mol | C <sub>18</sub> H <sub>26</sub> N <sub>2</sub> P <sub>2</sub> S <sub>4</sub> |
| T / K                  | 460.62                                                                       |
| Crystal system         | 100                                                                          |
| Space group            | triclinic                                                                    |
| a / Å                  | $P\bar{1}$                                                                   |
| b / Å                  | 8.3076(3)                                                                    |
| c / Å                  | 10.2906(4)                                                                   |

|                                                |                                                               |
|------------------------------------------------|---------------------------------------------------------------|
| $\alpha / ^\circ$                              | 15.3615(6)                                                    |
| $\beta / ^\circ$                               | 102.542(3)                                                    |
| $\gamma / ^\circ$                              | 101.566(3)                                                    |
| $V / \text{\AA}^3$                             | 106.023(3)                                                    |
| Z                                              | 1183.70(8)                                                    |
| $\rho_{\text{calc}} / \text{g/cm}^3$           | 2                                                             |
| $\mu / \text{mm}^{-1}$                         | 1.292                                                         |
| F(000)                                         | 5.00                                                          |
| Crystal size / $\text{mm}^3$                   | 484.0                                                         |
| Absorption correction                          | $0.2 \times 0.1 \times 0.05$                                  |
| $T_{\text{min}}; T_{\text{max}}$               | multi-scan                                                    |
| Radiation                                      |                                                               |
| $2\theta$ range for data collection / $^\circ$ | 0.2631; 0.4032                                                |
| Completeness to $\theta$                       |                                                               |
| Index ranges                                   | CuK $\alpha$ ( $\lambda = 1.54186$ )                          |
| Reflections collected                          | 9.342 to 141.228 $^\circ$                                     |
| Independent reflections                        | 0.994                                                         |
| Data/restraints/parameters                     | $-9 \leq h \leq 10, -12 \leq k \leq 12, -10 \leq l \leq 18$   |
| Goodness-of-fit on $F^2$                       | 27308                                                         |
| Final R indexes ( $I \geq 2\sigma(I)$ )        | 4455 [ $R_{\text{int}} = 0.0418, R_{\text{sigma}} = 0.0251$ ] |
| Final R indexes (all data)                     | 4455/0/239                                                    |
| Largest diff. peak/hole / $e/\text{\AA}^3$     | 1.051                                                         |

**Table S5:** Bond lengths for **4f**.

| Atom | Atom | Length/ $\text{\AA}$ | Atom | Atom | Length/ $\text{\AA}$ |
|------|------|----------------------|------|------|----------------------|
| S1   | C2   | 1.747(2)             | N2   | C8   | 1.354(3)             |
| S1   | C3   | 1.729(2)             | N2   | C9   | 1.397(3)             |
| S2   | C2   | 1.659(2)             | N2   | C10  | 1.473(3)             |
| S3   | C7   | 1.733(2)             | C1   | C3   | 1.351(3)             |
| S3   | C8   | 1.744(2)             | C4   | C5   | 1.529(3)             |
| S4   | C8   | 1.669(2)             | C5   | C6   | 1.516(3)             |
| P1   | C1   | 1.832(2)             | C7   | C9   | 1.352(3)             |
| P1   | C7   | 1.818(2)             | C10  | C11  | 1.516(3)             |
| P1   | C13  | 1.903(2)             | C11  | C12  | 1.525(3)             |
| P2   | C3   | 1.824(2)             | C13  | C14  | 1.554(3)             |
| P2   | C9   | 1.837(2)             | C13  | C15  | 1.552(3)             |
| P2   | C14  | 1.861(2)             | C13  | C17  | 1.543(3)             |
| N1   | C1   | 1.394(3)             | C15  | C16  | 1.530(3)             |
| N1   | C2   | 1.362(3)             | C17  | C18  | 1.530(3)             |
| N1   | C4   | 1.479(3)             |      |      |                      |

**Table S6:** Bond angles for **4f**.

| Atom | Atom | Atom | Angle/ $^\circ$ | Atom | Atom | Atom | Angle/ $^\circ$ |
|------|------|------|-----------------|------|------|------|-----------------|
| C3   | S1   | C2   | 92.36(11)       | N1   | C4   | C5   | 112.39(17)      |
| C7   | S3   | C8   | 92.08(10)       | C6   | C5   | C4   | 114.9(2)        |
| C1   | P1   | C13  | 96.35(10)       | S3   | C7   | P1   | 126.42(12)      |
| C7   | P1   | C1   | 95.11(10)       | C9   | C7   | S3   | 110.27(16)      |
| C7   | P1   | C13  | 98.31(9)        | C9   | C7   | P1   | 123.28(17)      |
| C3   | P2   | C9   | 94.54(10)       | S4   | C8   | S3   | 123.41(13)      |
| C3   | P2   | C14  | 96.38(10)       | N2   | C8   | S3   | 109.35(15)      |
| C9   | P2   | C14  | 96.60(10)       | N2   | C8   | S4   | 127.24(16)      |
| C1   | N1   | C4   | 124.20(18)      | N2   | C9   | P2   | 125.14(16)      |
| C2   | N1   | C1   | 114.85(18)      | C7   | C9   | P2   | 121.17(16)      |
| C2   | N1   | C4   | 120.91(19)      | C7   | C9   | N2   | 113.68(19)      |
| C8   | N2   | C9   | 114.59(17)      | N2   | C10  | C11  | 111.70(18)      |
| C8   | N2   | C10  | 121.75(17)      | C10  | C11  | C12  | 111.3(2)        |
| C9   | N2   | C10  | 123.57(17)      | C14  | C13  | P1   | 114.38(14)      |
| N1   | C1   | P1   | 124.61(16)      | C15  | C13  | P1   | 104.58(14)      |
| C3   | C1   | P1   | 121.70(17)      | C15  | C13  | C14  | 110.71(17)      |

---

|    |    |    |            |     |     |     |            |
|----|----|----|------------|-----|-----|-----|------------|
| C3 | C1 | N1 | 113.6(2)   | C17 | C13 | P1  | 106.59(14) |
| S2 | C2 | S1 | 124.20(14) | C17 | C13 | C14 | 108.33(18) |
| N1 | C2 | S1 | 108.71(17) | C17 | C13 | C15 | 112.23(17) |
| N1 | C2 | S2 | 127.10(18) | C13 | C14 | P2  | 120.95(15) |
| S1 | C3 | P2 | 126.69(13) | C16 | C15 | C13 | 114.60(19) |
| C1 | C3 | S1 | 110.44(17) | C18 | C17 | C13 | 116.59(19) |
| C1 | C3 | P2 | 122.80(18) |     |     |     |            |

---

## 5 Computational details

### 5.1 Theoretical methods

All structures were built with the open-source software *Avogadro 1.2.0*.<sup>160</sup> Structures were optimised using the *ORCA*<sup>161</sup> 4.0.1.2 program package at the TPSS-D3BJ/def2-TZVP(CPCM<sub>THF</sub>) level of theory, a combination of the meta-GGA density functional TPSS<sup>162</sup> with BJ-damped DFT-D3<sup>163</sup> dispersion correction and the def2-TZVP<sup>164</sup> basis set, including the conductor-like polarisable continuum model (CPCM)<sup>165</sup> as a solvent model for THF. In order to accelerate the optimisations and following harmonic frequency calculations, the density-fitting RI-J (def2/J) approach was used.<sup>166</sup> The DFT grid was set to 4, with the grid for the final energy being set to 5. Optimised structures were characterised by frequency analyses in order to identify the nature of the respective located stationary point (no imaginary frequency below  $-30\text{ cm}^{-1}$  for minima and only one imaginary frequency for transition states) and to get access to thermal corrections (for 298.15 K and 1 atm) according to the modified ideal gas-rigid rotor-harmonic oscillator model. Transition states were obtained via relaxed potential energy surface scans along the important bond in *ORCA* 4.0.1.2 or by nudged elastic band calculations<sup>167</sup> using *ORCA* 5.0.4. The transition state vibration was taken from the respective highest energy structure and the structure was optimised, keeping the imaginary frequency. Final single point energies were calculated with *ORCA* 4.0.1.2 on the RI-PW6B95-D3BJ/def2-QZVP(CPCM<sub>THF</sub>)<sup>164,168</sup> level of theory using the density-fitting RI-JK (def2/JK)<sup>169</sup> approach. The final Gibbs free energies *G* were obtained from the sum of the electronic single point energies and the thermal corrections accessed from the frequency analyses. Distortion energies were calculated by subtracting the energies of the respective dienophile/diphosphinine fragment in the transition state from the energies of the relaxed dienophile/diphosphinine. Calculated structures were visualised using the software *UCSF Chimera 1.17.2*.<sup>170</sup>

### 5.2 Additional tables/figures

**Table S7**  $\Delta_r G^\ddagger$  and  $\Delta_r G$  of the formation of compounds **3a-c**<sup>Me</sup> and **4a-f**<sup>Me</sup>.

|                          | alkyne/alkene    | $\Delta_r G^\ddagger$ / kcal/mol | $\Delta_r G$ / kcal/mol |
|--------------------------|------------------|----------------------------------|-------------------------|
| <b>3a</b> <sup>Me</sup>  | DEAD             | 27.7                             | -14.4                   |
| <b>3b</b> <sup>Me</sup>  | ethyl propiolate | 18.5                             | -23.2                   |
| <b>3c</b> <sup>Me</sup>  | 3-hexyne         | 20.3                             | -11.7                   |
| <b>4a</b> <sup>Me</sup>  | diethyl maleate  | 10.8                             | -13.0                   |
| <b>4a'</b> <sup>Me</sup> | diethyl fumarate | 18.6<br>14.8                     | -3.1<br>-4.4            |
| <b>4b</b> <sup>Me</sup>  | ethyl acrylate   | 17.8<br>18.8                     | -4.9<br>-6.1            |
| <b>4c</b> <sup>Me</sup>  | 1-hexene         | 21.0<br>19.5                     | -6.8<br>-7.1            |
| <b>4d</b> <sup>Me</sup>  | Ethene           | 17.8                             | -11.2                   |
| <b>4e</b> <sup>Me</sup>  | Cyclohexene      | 23.4                             | -3.0                    |
| <b>4f</b> <sup>Me</sup>  | 2-ethyl-1-butene | 20.6                             | -5.4                    |

**Fig S52**  $\Delta_r G$  and  $\Delta_r G^\ddagger$  of 1,4-diphosphabarrelenes having an unsaturated (**3a–d<sup>Me</sup>**) or saturated (**4a–f<sup>Me</sup>**) bridge (left) and  $\Delta_r G$  of **3a–d<sup>Me</sup>** and **4a–d<sup>Me</sup>** (right).

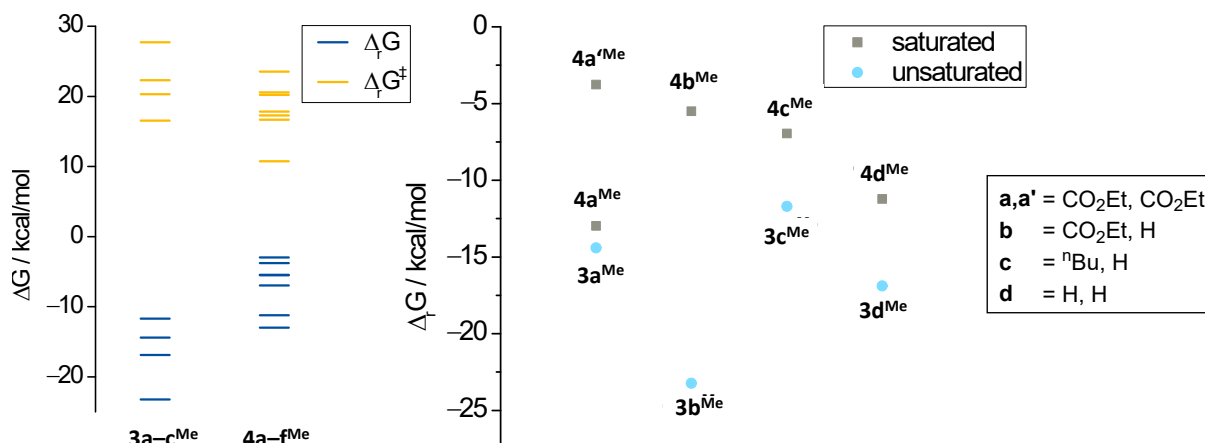

**Table S8**  $\Delta_r G^\ddagger$  and  $\Delta_r G$  of the formation of compounds **3a–c<sup>Me</sup>** and **4a–f<sup>Me</sup>**.

|                         | alkene/alkyne    | $\Delta_r G_{\text{dist}}$ / kcal/mol |                        |       |
|-------------------------|------------------|---------------------------------------|------------------------|-------|
|                         |                  | alkyne/alkene fragment                | diphosphinine fragment | total |
| <b>3a<sup>Me</sup></b>  | DEAD             | 12.4                                  | 7.4                    | 19.9  |
| <b>3b<sup>Me</sup></b>  | ethyl propiolate | 5.8                                   | 8.1                    | 13.9  |
| <b>3c<sup>Me</sup></b>  | 3-hexyne         | 16.5                                  | 9.7                    | 26.3  |
| <b>3d<sup>Me</sup></b>  | ethyne           | 9.2                                   | 9.5                    | 18.7  |
| <b>4a<sup>Me</sup></b>  | diethyl maleate  | 2.9                                   | 10.6                   | 13.4  |
| <b>4a'<sup>Me</sup></b> | diethyl fumarate | 12.6                                  | 12.1                   | 24.6  |
|                         |                  | 10.7                                  | 12.3                   | 23.0  |
| <b>4b<sup>Me</sup></b>  | ethyl acrylate   | 7.9                                   | 9.8                    | 17.8  |
|                         |                  | 9.1                                   | 10.0                   | 19.1  |
| <b>4c<sup>Me</sup></b>  | 1-hexene         | 12.5                                  | 14.2                   | 26.7  |
|                         |                  | 10.7                                  | 10.9                   | 21.6  |
| <b>4d<sup>Me</sup></b>  | Ethene           | 6.7                                   | 10.1                   | 16.8  |
| <b>4e<sup>Me</sup></b>  | Cyclohexene      | 15.1                                  | 10.8                   | 25.9  |
| <b>4f<sup>Me</sup></b>  | 2-ethyl-1-butene | 12.7                                  | 11.3                   | 23.9  |

## 5.3 Coordinates

### 5.3.1 **1<sup>Me</sup>**

E = -2696.235653675209

|   |          |          |           |
|---|----------|----------|-----------|
| C | 3.972083 | 6.503908 | 1.249647  |
| C | 2.565938 | 6.575210 | 1.320480  |
| P | 1.400545 | 6.515237 | 0.003816  |
| C | 2.475970 | 6.346970 | -1.358836 |
| C | 3.882109 | 6.275521 | -1.429660 |
| P | 5.047562 | 6.336801 | -0.113112 |

|   |          |          |           |
|---|----------|----------|-----------|
| N | 4.338315 | 6.139387 | -2.739973 |
| C | 3.379465 | 6.098055 | -3.733366 |
| S | 1.802903 | 6.237618 | -2.975836 |
| N | 2.109660 | 6.709924 | 2.630916  |
| C | 3.068453 | 6.750151 | 3.624406  |
| S | 4.645097 | 6.612363 | 2.866722  |
| S | 2.837375 | 6.901697 | 5.248675  |
| S | 3.610511 | 5.945923 | -5.357583 |
| C | 5.764815 | 6.045985 | -3.050295 |
| H | 5.851238 | 5.936474 | -4.132268 |
| H | 6.193954 | 5.178335 | -2.539860 |
| H | 6.273266 | 6.954979 | -2.714371 |
| C | 0.683148 | 6.803147 | 2.941237  |
| H | 0.596569 | 6.909467 | 4.023515  |
| H | 0.174366 | 5.895420 | 2.602417  |
| H | 0.254488 | 7.672558 | 2.433390  |

### 5.3.2 $2\alpha^{Me}$

E = -5006.931003797543

|    |                  |                   |                   |
|----|------------------|-------------------|-------------------|
| C  | 4.02475278897753 | 6.40802738345381  | 1.32059455141458  |
| C  | 2.66698873412746 | 6.59972182756763  | 1.39234191816411  |
| P  | 1.56843570258564 | 6.13814670908466  | -0.00474325537492 |
| C  | 2.62629745620955 | 6.86170621963828  | -1.30205663482201 |
| C  | 3.98187806350150 | 6.65532969845691  | -1.37534031726600 |
| P  | 4.85844209589007 | 5.64983634530337  | -0.11322298440008 |
| N  | 4.56840731170391 | 7.25009709128418  | -2.49388972302703 |
| C  | 3.70741448359073 | 7.91299204612130  | -3.33043487350230 |
| S  | 2.09515510180376 | 7.82854961805499  | -2.65227346044413 |
| N  | 2.25122048164307 | 7.13328722322069  | 2.61355701236330  |
| C  | 3.24624569474207 | 7.35573880594084  | 3.53051806981596  |
| S  | 4.78008264600036 | 6.92156669660407  | 2.80594388923020  |
| S  | 3.05070647740087 | 7.94945104207396  | 5.08062868170283  |
| S  | 4.10912854435923 | 8.68558014247278  | -4.75714566276056 |
| C  | 6.00046385910380 | 7.17391774357821  | -2.80125433889727 |
| H  | 6.15433236462938 | 6.54619340506814  | -3.68249737827496 |
| H  | 6.50524999041684 | 6.74429029171893  | -1.93547468954353 |
| H  | 6.37181278371757 | 8.17924081726439  | -3.00749172786143 |
| C  | 0.85272193519396 | 7.43057526216238  | 2.94056309356231  |
| H  | 0.50304408371931 | 6.74346227616474  | 3.71497711559795  |
| H  | 0.26419922525036 | 7.31010436374402  | 2.03062131348076  |
| H  | 0.78571223685242 | 8.45448515192912  | 3.31269308475474  |
| Ga | 2.94724081504659 | 4.13494587838222  | -0.22321084982517 |
| C  | 2.46217584359055 | 1.00414098973337  | -0.51723916750210 |
| C  | 2.50211764415207 | 1.72406339368218  | -1.72276136637992 |
| N  | 2.69487910891222 | 3.04810536891816  | -1.79703806804114 |
| N  | 2.82364188528111 | 2.75427138766433  | 1.11849881369603  |
| C  | 2.60891144550370 | 1.47050034446789  | 0.79962425992184  |
| C  | 2.31336015118197 | 0.95154090122197  | -3.00301073150429 |
| H  | 2.18099622120450 | -0.11012503124939 | -2.79299663730597 |
| H  | 3.17889464419822 | 1.07958146118349  | -3.66291445776207 |
| H  | 1.43575804792795 | 1.31772646691871  | -3.54811920788874 |



|   |                  |                   |                   |
|---|------------------|-------------------|-------------------|
| C | 2.52065945053692 | 0.45769220672605  | 1.91216346702371  |
| H | 2.32649357962038 | -0.53674564364176 | 1.50949614143130  |
| H | 1.72013349617837 | 0.72163603506225  | 2.61243701825240  |
| H | 3.45470544778835 | 0.43268211975122  | 2.48520520594925  |
| C | 2.71832754251840 | 3.70181142529459  | -3.11572561431047 |
| H | 2.83849974069539 | 4.77567846090538  | -2.96988517025022 |
| H | 1.78366190876362 | 3.53018898819737  | -3.65946408844692 |
| H | 3.55333049250686 | 3.33650500046782  | -3.72341672070723 |
| C | 2.96340842018669 | 3.13336068661146  | 2.53395043389273  |
| H | 3.78428896682962 | 2.58800855576048  | 3.01076965627152  |
| H | 2.03938963625569 | 2.93745340442227  | 3.08890229501243  |
| H | 3.18218464860074 | 4.20016787883379  | 2.58886107110874  |
| H | 2.29544380110069 | -0.06164444022130 | -0.61740396654819 |

### 5.3.3 $2b^{Me}$

E = -3323.791623352091

|    |                  |                   |                   |
|----|------------------|-------------------|-------------------|
| C  | 4.04199549810001 | 6.37112814438846  | 1.31386142688811  |
| C  | 2.68454485890242 | 6.56259352849417  | 1.39609489586857  |
| P  | 1.57321255605512 | 6.09699183218913  | 0.00606857095339  |
| C  | 2.62576186797545 | 6.82241131224260  | -1.30060421237631 |
| C  | 3.98136465289419 | 6.61836532924965  | -1.38373533659069 |
| P  | 4.86940163808019 | 5.60952667426282  | -0.12729381144056 |
| N  | 4.55969723167665 | 7.21965810153630  | -2.50402378753246 |
| C  | 3.69232231080885 | 7.88403697100211  | -3.33290079200986 |
| S  | 2.08540899064136 | 7.79667228589250  | -2.64310329698630 |
| N  | 2.27910751066627 | 7.10298278977937  | 2.61857145409105  |
| C  | 3.28130530547304 | 7.32979032800607  | 3.52667059039921  |
| S  | 4.80939003936789 | 6.89601260626500  | 2.79031797599078  |
| S  | 3.09713055456696 | 7.92766343162252  | 5.07672770046405  |
| S  | 4.08421985417031 | 8.66026057292206  | -4.76050167490793 |
| C  | 5.98985129367221 | 7.14809457394379  | -2.82048103375697 |
| H  | 6.13837554104371 | 6.53555118765576  | -3.71327084448227 |
| H  | 6.49824133292919 | 6.70349197047373  | -1.96443204642753 |
| H  | 6.36128663693290 | 8.15644059183164  | -3.01165951347595 |
| C  | 0.88334266980878 | 7.40110637127781  | 2.95565311543587  |
| H  | 0.54213818498007 | 6.72109809091667  | 3.74009415724711  |
| H  | 0.28744278176848 | 7.27037926120721  | 2.05192932667530  |
| H  | 0.81755255196955 | 8.42851230919831  | 3.31833460958784  |
| Al | 2.95753296546474 | 4.11005902353216  | -0.22205865128706 |
| C  | 2.43124304813621 | 1.01586338855026  | -0.50631513645127 |
| C  | 2.48726908557036 | 1.74193301531907  | -1.70548318784714 |
| N  | 2.70962192450718 | 3.06761852373285  | -1.75528330568670 |
| N  | 2.83437289906030 | 2.78479810625158  | 1.09206806526683  |
| C  | 2.59435380676652 | 1.49335673982549  | 0.80281742704787  |
| C  | 2.28566368353618 | 0.98794597296528  | -2.99228122038105 |
| H  | 2.12504134713980 | -0.07191824110956 | -2.79358989546666 |
| H  | 3.15754087904457 | 1.10038210762033  | -3.64682257287514 |
| H  | 1.42120048464788 | 1.38253865076949  | -3.53871542940661 |
| C  | 2.49713543356375 | 0.49998346701561  | 1.92921796895630  |
| H  | 2.27620781780474 | -0.49547511103643 | 1.54343101267695  |
| H  | 1.71216042016791 | 0.79211458800166  | 2.63595735086195  |
| H  | 3.43753884927437 | 0.46245115256772  | 2.49133226170211  |

|   |                  |                   |                   |
|---|------------------|-------------------|-------------------|
| C | 2.75027727239882 | 3.72214667989932  | -3.07730159814810 |
| H | 2.90825156543842 | 4.79123247664211  | -2.93201636884290 |
| H | 1.80742774776724 | 3.58453841576050  | -3.61580079865621 |
| H | 3.56979932628088 | 3.32867788247274  | -3.68745917752830 |
| C | 2.99205679577099 | 3.16910440187442  | 2.50812244616110  |
| H | 3.80057149049767 | 2.60524455752627  | 2.98323846200888  |
| H | 2.06541789461696 | 3.00305334030068  | 3.06762857230030  |
| H | 3.24057407355461 | 4.22989319467985  | 2.55569112964483  |
| H | 2.24242432650629 | -0.04640159751905 | -0.60360282766442 |

### 5.3.4 $3\alpha^{Me}$

E = -3309.032275071040

|   |                   |                  |                   |
|---|-------------------|------------------|-------------------|
| C | 3.74105119134508  | 6.26126491346011 | 0.58588866717453  |
| C | 2.38990597994887  | 6.41901457005862 | 0.59983269667995  |
| P | 1.37849050145422  | 5.97962885891949 | -0.87481703676052 |
| C | 2.46617992638098  | 6.79937024407936 | -2.08276723154829 |
| C | 3.81674060113616  | 6.62897068002108 | -2.09100506821728 |
| P | 4.65320254095644  | 5.56432263010779 | -0.83622568685325 |
| N | 4.45760344741136  | 7.30840606772400 | -3.11290814946405 |
| C | 3.62712228152704  | 8.03287567790746 | -3.94092033371283 |
| S | 1.97599947132268  | 7.83246168273285 | -3.38862299011400 |
| N | 1.89310598834872  | 6.91289708131052 | 1.79549754331371  |
| C | 2.84479497923542  | 7.16077965719521 | 2.75970702204402  |
| S | 4.41882886770513  | 6.74513984822065 | 2.10724924486915  |
| S | 2.56674778595950  | 7.75664589994397 | 4.28889704040103  |
| S | 4.09659629063249  | 8.95210435118821 | -5.24641883809526 |
| C | 5.90800213593385  | 7.29600291740397 | -3.34078701106677 |
| H | 6.11261924824472  | 6.86459434150963 | -4.32260469205449 |
| H | 6.37015730241314  | 6.69759325524788 | -2.55604559608402 |
| H | 6.28029093077361  | 8.32183314838601 | -3.31133097884297 |
| C | 0.47319749313500  | 7.17038148879568 | 2.06604050063188  |
| H | 0.14852523288100  | 6.54338000882742 | 2.89887826156868  |
| H | -0.09390830469019 | 6.93415832161527 | 1.16590491768540  |
| H | 0.34653792927607  | 8.22126652940822 | 2.33316172769660  |
| C | 3.49315945318583  | 4.10884913872607 | -1.08719574005913 |
| C | 2.16326348804300  | 4.27827884498595 | -1.05686626263504 |
| C | 1.14873143972672  | 3.19190797903657 | -1.25111827402443 |
| O | 0.81215780571521  | 2.63941310129956 | -0.08158703795476 |
| C | -0.27023541493279 | 1.63512583176390 | -0.10916144244384 |
| O | 0.63778279139670  | 2.96421450358738 | -2.33336868742062 |
| C | 4.07917510108484  | 2.75473428246826 | -1.29464339388847 |
| O | 5.42199585643555  | 2.80652839912276 | -1.33671109361928 |
| C | 6.12893917549468  | 1.52859838298518 | -1.51302710536179 |
| O | 3.41532059815200  | 1.73747194177546 | -1.42090419580148 |
| C | -1.61669736455795 | 2.31529538879210 | 0.04880243180584  |
| H | -0.03292172712884 | 0.98597806813008 | 0.73402888351557  |
| H | -0.19012086795498 | 1.07985547503603 | -1.04481030627731 |
| H | -1.65083234103492 | 2.89570338111690 | 0.97555673587419  |
| H | -2.39933799189989 | 1.55027863752412 | 0.08940861960654  |
| H | -1.82340040483593 | 2.97663100762371 | -0.79717450130944 |
| C | 6.37879569392423  | 0.87656561810527 | -0.16568155647064 |
| H | 7.05641874559094  | 1.81785495366601 | -2.00841121993624 |

|   |                  |                   |                   |
|---|------------------|-------------------|-------------------|
| H | 5.52862141609061 | 0.89965971682040  | -2.17274577319984 |
| H | 6.94989973094827 | 1.54357253026060  | 0.48673177907425  |
| H | 6.95765990405966 | -0.04063282903146 | -0.31724107155451 |
| H | 5.43641503296579 | 0.61547986544173  | 0.32345318472920  |

### 5.3.5 $3b^{Me}$

E = -3041.399925674273

|   |                   |                   |                   |
|---|-------------------|-------------------|-------------------|
| C | 3.69870517742494  | 6.40029686348000  | 0.67722749301750  |
| C | 2.35108116173161  | 6.58471030583555  | 0.68157415731006  |
| P | 1.32698275237884  | 6.05096047865052  | -0.76056273539134 |
| C | 2.41809242647736  | 6.79746507709664  | -2.02106786188037 |
| C | 3.76537943635303  | 6.60834297037754  | -2.02000853995101 |
| P | 4.59187209880646  | 5.60279147881603  | -0.70460420738980 |
| N | 4.41865710781721  | 7.24401378856339  | -3.06311336033278 |
| C | 3.60256627089771  | 7.95769063197493  | -3.92871051592945 |
| S | 1.94051708998708  | 7.79370245146300  | -3.36408715520760 |
| N | 1.87047570033184  | 7.18634839566657  | 1.83347578816735  |
| C | 2.83105561127146  | 7.49990340094429  | 2.78352895186883  |
| S | 4.39912569391323  | 6.99586773530016  | 2.15316245464603  |
| S | 2.55952014282623  | 8.21899117209174  | 4.24290213746688  |
| S | 4.09563692588532  | 8.80828668519430  | -5.25313971392033 |
| C | 5.86503620086989  | 7.20807617500669  | -3.29317220809600 |
| H | 6.06217149814760  | 6.77317598278868  | -4.27587143080810 |
| H | 6.32079239053359  | 6.60869363804150  | -2.50411969299221 |
| H | 6.25504781415211  | 8.22863256158023  | -3.28169658846716 |
| C | 0.46388107945697  | 7.50505249849493  | 2.09007484643200  |
| H | 0.13480754600025  | 6.98171219877402  | 2.99098443693841  |
| H | -0.12058962493932 | 7.19236925629518  | 1.22394574228270  |
| H | 0.36457558413627  | 8.58000720897015  | 2.25851121642280  |
| C | 3.40858112824567  | 4.15848309393134  | -0.86897272039886 |
| C | 2.08426397878186  | 4.35709646534866  | -0.85003847503971 |
| C | 3.94287039049661  | 2.77136745467701  | -1.00995291682598 |
| O | 5.28773348875795  | 2.79013913515988  | -1.17399726687305 |
| C | 5.93655884301386  | 1.48577720687641  | -1.31161586103009 |
| O | 3.26205741916899  | 1.76410084962777  | -0.99404170738536 |
| H | 1.40989226559947  | 3.50504550350945  | -0.92314891301440 |
| C | 6.28419457506559  | 0.91853529895524  | 0.05387969570262  |
| H | 6.82740069534554  | 1.70101100285074  | -1.90479649010059 |
| H | 5.26325161849983  | 0.82796711089683  | -1.86572345080714 |
| H | 6.92101442617710  | 1.61175962754045  | 0.61119767523471  |
| H | 6.82585939711634  | -0.02515382055806 | -0.07189741526735 |
| H | 5.37753168927151  | 0.72049011577825  | 0.63134463161876  |

### 5.3.6 $3c^{Me}$

E = -2931.297334350897

|   |                  |                  |                   |
|---|------------------|------------------|-------------------|
| C | 3.70702219643299 | 6.49697857969386 | 0.77987887684780  |
| C | 2.35016966379971 | 6.56599819061521 | 0.71074179668685  |
| P | 1.45956634725176 | 5.87918097883869 | -0.74808377332178 |
| C | 2.54264035755058 | 6.67456516490892 | -1.98259956129317 |
| C | 3.89922326001221 | 6.60045019101753 | -1.91348117508322 |
| P | 4.70968277553927 | 5.70471488176377 | -0.52262179736309 |

|   |                   |                  |                   |
|---|-------------------|------------------|-------------------|
| N | 4.54763562393467  | 7.22166590695072 | -2.97079850848976 |
| C | 3.71753874291261  | 7.79851367091470 | -3.90448408297803 |
| S | 2.05744684283328  | 7.54337410079473 | -3.40499171293421 |
| N | 1.76329149086602  | 7.15807980875427 | 1.81931924034367  |
| C | 2.64337679005479  | 7.56838686057742 | 2.79427640180701  |
| S | 4.27135204148786  | 7.19023152647282 | 2.26802521650426  |
| S | 2.24457143363160  | 8.30781237843026 | 4.23495241838285  |
| S | 4.19432411776017  | 8.60990223734219 | -5.28133933722688 |
| C | 6.00548998475346  | 7.28078124582051 | -3.12974230481286 |
| H | 6.29171149618484  | 6.74139013458857 | -4.03527466769263 |
| H | 6.46042245316985  | 6.82312769919319 | -2.25132733999654 |
| H | 6.31118614839298  | 8.32476561686163 | -3.22026489845098 |
| C | 0.31838427758848  | 7.35137074960430 | 1.98887349182506  |
| H | -0.02200412432787 | 6.78019885057602 | 2.85528495796840  |
| H | -0.17788553492761 | 7.00472036546615 | 1.08249726648168  |
| H | 0.11779485468507  | 8.41154283548858 | 2.15474278469446  |
| C | 3.67145333036691  | 4.14601208100345 | -0.67460521357157 |
| C | 2.33488828199706  | 4.21616322564556 | -0.73775824554057 |
| C | 1.37530807153810  | 3.05253877042054 | -0.78716633204747 |
| C | 0.57939327006057  | 2.93119307528753 | 0.52462183038958  |
| C | 4.50865955943306  | 2.89178165025271 | -0.73822965940705 |
| C | 5.28790536089920  | 2.81051955091829 | -2.06306708909202 |
| H | -0.14883779629332 | 2.11718700299158 | 0.45655179994718  |
| H | 0.03063040410713  | 3.85715838507952 | 0.73602143931520  |
| H | 1.25147442211289  | 2.73433038701287 | 1.36563241444107  |
| H | 1.91668958347918  | 2.12265903354516 | -0.98375944913979 |
| H | 0.67589038257166  | 3.20463464770913 | -1.61956791630049 |
| H | 5.21976577835392  | 2.89636065638493 | 0.09806707854657  |
| H | 3.87558589265465  | 2.00748272795526 | -0.62157625846792 |
| H | 5.92736570877057  | 3.69191506445988 | -2.19537591635123 |
| H | 4.59910290133189  | 2.75968685231624 | -2.91204681493595 |
| H | 5.93000360902982  | 1.92447491434332 | -2.07590495968443 |

### 5.3.7 $3d^{Me}$

E = -2773.758301717286

|   |                  |                  |                   |
|---|------------------|------------------|-------------------|
| C | 3.70933765876113 | 6.46636498417746 | 0.77315364261383  |
| C | 2.35267094511148 | 6.53502750713963 | 0.70703904466619  |
| P | 1.44224340770972 | 5.84610056048511 | -0.74799599365384 |
| C | 2.53747732011220 | 6.64477695723922 | -1.97848608894606 |
| C | 3.89382029777198 | 6.57012724722625 | -1.91262183077404 |
| P | 4.72339615540964 | 5.66978628915102 | -0.52631947655585 |
| N | 4.54051778195785 | 7.21876402087935 | -2.95416095007834 |
| C | 3.70851516323251 | 7.82081163671214 | -3.87056480755524 |
| S | 2.04945081636594 | 7.54777026523141 | -3.37747714874922 |
| N | 1.77050960239101 | 7.15651680695497 | 1.80178124648095  |
| C | 2.65520481215464 | 7.59353407386135 | 2.76133026577630  |
| S | 4.28020628445936 | 7.19570628596866 | 2.24047182074818  |
| S | 2.26442552938056 | 8.37094957959136 | 4.18332218707475  |
| S | 4.18168862688945 | 8.67047770373050 | -5.22451509030974 |
| C | 5.99795587286413 | 7.28839761800694 | -3.11387523707117 |
| H | 6.28247207041911 | 6.78702955254362 | -4.04137498041713 |
| H | 6.45730045678072 | 6.79631289039569 | -2.25690998048386 |

|   |                   |                  |                   |
|---|-------------------|------------------|-------------------|
| H | 6.30018461633156  | 8.33624300345111 | -3.16293509424225 |
| C | 0.32688545640815  | 7.35861789981958 | 1.97340271570343  |
| H | -0.00733742451295 | 6.82248920339522 | 2.86411218818982  |
| H | -0.17711766325502 | 6.97667226783353 | 1.08591298823116  |
| H | 0.12923408872083  | 8.42492228070670 | 2.09879121164342  |
| C | 3.66704873294018  | 4.14295193900356 | -0.67526192878832 |
| C | 2.33772604769341  | 4.21307716043694 | -0.73562681251614 |
| H | 4.19835087093378  | 3.19386462865647 | -0.68963568839100 |
| H | 1.71304524476863  | 3.32502387260222 | -0.80140298029584 |

### 5.3.8 $4\alpha^{Me}$

E = -3310.279597850461

|   |                   |                  |                   |
|---|-------------------|------------------|-------------------|
| C | 3.71650953293307  | 6.78713568522110 | 1.13654875898511  |
| C | 2.37304145037515  | 6.93348756574842 | 0.95568995876229  |
| P | 1.48498522803804  | 5.97371823947029 | -0.32324688005143 |
| C | 2.68270874406844  | 6.18582667302877 | -1.65836773198102 |
| C | 4.02901907377427  | 6.05994149254451 | -1.47879659321052 |
| P | 4.74085873254562  | 5.65474241774798 | 0.15493719192855  |
| N | 4.75292831926578  | 6.13480526325797 | -2.65649903823400 |
| C | 4.00266462147790  | 6.30125409209554 | -3.80799786740682 |
| S | 2.30767135234551  | 6.38458273221165 | -3.34642660540197 |
| N | 1.77861456304402  | 7.80204894152742 | 1.86038462736034  |
| C | 2.63459967774447  | 8.37129844533124 | 2.78982469815124  |
| S | 4.25841181152412  | 7.75910959071844 | 2.47675440203341  |
| S | 2.21353190544575  | 9.44292915522944 | 3.97162410067751  |
| S | 4.59762404015524  | 6.40876282494790 | -5.34562081330229 |
| C | 6.21140732655051  | 6.05679402196509 | -2.74335667767709 |
| H | 6.48746742314403  | 5.24068798979432 | -3.41450308426429 |
| H | 6.60372996628942  | 5.88383819987434 | -1.74091281212484 |
| H | 6.59806734767942  | 6.99019380258973 | -3.16013817207548 |
| C | 0.35698868559895  | 8.15540151868597 | 1.87179633250063  |
| H | -0.07076619606930 | 7.89440180537028 | 2.84267679901006  |
| H | -0.13727063633783 | 7.60762303308623 | 1.06834512312584  |
| H | 0.25352389404908  | 9.23361192951214 | 1.72765413480620  |
| C | 3.66022657952476  | 4.11537679987520 | 0.45985923834515  |
| C | 2.11643184211760  | 4.27587391235978 | 0.30841932560132  |
| C | 1.49647657586657  | 3.27048409737676 | -0.64689785189784 |
| O | 0.52661818950218  | 2.56322889467109 | -0.04042659773458 |
| C | -0.13715944068819 | 1.56476688415008 | -0.88355700146789 |
| O | 1.80995066923846  | 3.15718362553553 | -1.81658130514184 |
| C | 4.19269591715867  | 2.91852876248835 | -0.32945817635937 |
| O | 5.03869463330966  | 3.30634661912688 | -1.30480684868924 |
| C | 5.52916727924934  | 2.27024921778168 | -2.22295024372549 |
| O | 3.89136522031715  | 1.77133490497735 | -0.07593174693073 |
| H | 3.84491431539964  | 3.87101427940931 | 1.51122309965715  |
| H | 1.64346877284291  | 4.16351682211739 | 1.28615190526778  |
| C | -1.13260169376888 | 0.83621572430872 | -0.00597070324223 |
| H | 0.63555614142529  | 0.90337475277148 | -1.28399180762418 |
| H | -0.61260041777294 | 2.09013207406777 | -1.71683355786094 |
| H | -0.62595026353786 | 0.33901228760682 | 0.82610335839135  |
| H | -1.65177971302892 | 0.07624883785677 | -0.59888494058608 |
| H | -1.87800406373076 | 1.52706169797334 | 0.39884374512708  |

|   |                  |                  |                   |
|---|------------------|------------------|-------------------|
| C | 4.71226069579675 | 2.29897803157227 | -3.50185818879571 |
| H | 5.46218223014162 | 1.31088633865978 | -1.70680831359650 |
| H | 6.57600751749373 | 2.53346098610395 | -2.38961467159747 |
| H | 3.66217727897944 | 2.08536074377254 | -3.29086154551394 |
| H | 5.09912659486672 | 1.53940782640068 | -4.19016842363597 |
| H | 4.77718827565538 | 3.27340045907769 | -3.99442859960125 |

### 5.3.9 $4a'^{Me}$

E = -3310.284562313831

|   |                   |                  |                   |
|---|-------------------|------------------|-------------------|
| C | 3.78875414632365  | 6.26740579569706 | 1.34522764700674  |
| C | 2.43883816551574  | 6.20960589621497 | 1.53369319650200  |
| P | 1.35618230759973  | 5.15836278795293 | 0.49517622648140  |
| C | 2.20522209884127  | 5.50065610456184 | -1.07980716672385 |
| C | 3.55913591031783  | 5.40514057430886 | -1.22327461869238 |
| P | 4.67413237070812  | 5.15477422803647 | 0.21060875861816  |
| N | 3.98189136230362  | 5.47810542389503 | -2.54498166693646 |
| C | 2.97828742962311  | 5.62389843455241 | -3.47348772742460 |
| S | 1.44170087636424  | 5.67394462736662 | -2.62955421862033 |
| N | 1.98900667147919  | 7.03261462516505 | 2.55975336633213  |
| C | 2.96769715087080  | 7.75662450764307 | 3.20017364866544  |
| S | 4.51400951730948  | 7.37200719393024 | 2.47024871796066  |
| S | 2.74044637959813  | 8.82278573452100 | 4.45847744809494  |
| S | 3.16858127793529  | 5.74992243775881 | -5.12256307886666 |
| C | 5.38429239405970  | 5.41051617224470 | -2.97404991486304 |
| H | 5.51796611194165  | 4.54148608710495 | -3.62137542877865 |
| H | 6.00856119602300  | 5.32461408127966 | -2.08487838187716 |
| H | 5.63065336913835  | 6.31733738252514 | -3.52978171921581 |
| C | 0.58493785008544  | 7.16071795414729 | 2.96842702090877  |
| H | 0.48285802492437  | 6.83992679866806 | 4.00738182992191  |
| H | -0.01911263695744 | 6.53248162074886 | 2.31407776443003  |
| H | 0.28256980191590  | 8.20623288102295 | 2.88331238620920  |
| C | 3.81047768138143  | 3.58608965493683 | 0.91408330431942  |
| C | 2.29935429595171  | 3.49797472934282 | 0.72115121493342  |
| C | 1.95925491871285  | 2.67916604959036 | -0.51820735987900 |
| O | 0.63189421660777  | 2.66862935306320 | -0.72436187927029 |
| C | 0.15982424204132  | 1.98932342056598 | -1.94281808301617 |
| O | 2.77215853417843  | 2.13229037035926 | -1.24143682880940 |
| C | 4.29893558790545  | 3.52105028397956 | 2.35171048620935  |
| O | 3.29794471481419  | 3.44228576983907 | 3.24180769084565  |
| C | 3.66964806639306  | 3.38466075416620 | 4.66700525091170  |
| O | 5.48408114543314  | 3.55350514000015 | 2.64312671894501  |
| H | 1.83038020038789  | 3.02451781749187 | 1.58810161457417  |
| C | -1.30611556826133 | 2.33009266144098 | -2.09592080299910 |
| H | 0.33222433601794  | 0.91844187714756 | -1.80994734885509 |
| H | 0.76427111380868  | 2.34960555472996 | -2.77846495268416 |
| H | -1.88091474586263 | 1.98824692649648 | -1.23023423975761 |
| H | -1.69557869911383 | 1.83266930930019 | -2.98977972834719 |
| H | -1.44466779779267 | 3.40916826917671 | -2.21195986875536 |
| C | 3.75442598528107  | 4.78192077819696 | 5.24942574864593  |
| H | 4.61463294248460  | 2.84531280919865 | 4.74632740367986  |
| H | 2.86412272168719  | 2.80158395787367 | 5.11469028439389  |
| H | 4.55935087310166  | 5.35448276340390 | 4.78203323094631  |

|   |                  |                  |                  |
|---|------------------|------------------|------------------|
| H | 3.96124157575678 | 4.70743145838092 | 6.32219061930221 |
| H | 2.81053227631367 | 5.31847541114460 | 5.11868936038296 |
| H | 4.28400706795048 | 2.76053799322818 | 0.37147701045105 |

E = -3310.287147905976

|   |                   |                  |                   |
|---|-------------------|------------------|-------------------|
| C | 3.30414769007489  | 5.34684094383334 | 1.56695249845490  |
| C | 1.99457814768751  | 5.18716861464380 | 1.21844684585071  |
| P | 1.51718172139722  | 4.04814606773543 | -0.14719314198913 |
| C | 2.74292788810558  | 4.65997633093405 | -1.33981809257617 |
| C | 4.02682096209234  | 4.98823727584564 | -1.01526662195648 |
| P | 4.69789566106601  | 4.61709524565545 | 0.65370039352940  |
| N | 4.75840802008331  | 5.49947578982782 | -2.07360606280707 |
| C | 4.07792139871071  | 5.58237134028423 | -3.26880593914197 |
| S | 2.44987137571232  | 4.98481325362612 | -3.02573088584926 |
| N | 1.10850575516770  | 5.81934079445380 | 2.07702140876247  |
| C | 1.69205742996416  | 6.49666181016973 | 3.12565090550497  |
| S | 3.42954509310606  | 6.31406138066148 | 3.00715398129416  |
| S | 0.89026566987883  | 7.35735691957303 | 4.30429358825213  |
| S | 4.68969302954050  | 6.15624392417594 | -4.70673591934860 |
| C | 6.14112829244352  | 5.97998612725327 | -1.96438793994261 |
| H | 6.75118716938502  | 5.49662354764673 | -2.72901974148647 |
| H | 6.50759602261065  | 5.73370415697422 | -0.96822291502483 |
| H | 6.15854224682869  | 7.06048344016693 | -2.12351314043600 |
| C | -0.34850133206769 | 5.83310682607201 | 1.90005031044151  |
| H | -0.82233465610031 | 5.49754884991784 | 2.82394758035771  |
| H | -0.59634743418860 | 5.16820616381119 | 1.07311697249657  |
| H | -0.67443379348496 | 6.85252695993827 | 1.68200197709115  |
| C | 4.06349706882646  | 2.81484996427431 | 0.59893402814513  |
| C | 2.54810729070743  | 2.62654778744989 | 0.61971159818322  |
| C | 2.03715531603367  | 2.41970987748055 | 2.03673155226744  |
| O | 0.69203252611434  | 2.40418009677455 | 2.06000509235590  |
| C | 0.06584516985488  | 2.24033106601287 | 3.38326627672834  |
| O | 2.73989371314537  | 2.29877281855627 | 3.02330706909099  |
| C | 4.67980346687179  | 2.08179493335139 | -0.58548770020462 |
| O | 5.87488630755732  | 2.59799012341530 | -0.92146751432834 |
| C | 6.58917464111048  | 1.93307267105499 | -2.02968679080129 |
| O | 4.16292873671917  | 1.12991437429031 | -1.14137243872118 |
| C | -1.42775395396719 | 2.14999690965022 | 3.16089031866909  |
| H | 0.35098134321518  | 3.10327677219797 | 3.99137358395714  |
| H | 0.47676066206143  | 1.33538305069358 | 3.83582731683076  |
| H | -1.81294315542559 | 3.05428458385060 | 2.68142933091417  |
| H | -1.92346044069575 | 2.03581290737456 | 4.13003659441893  |
| H | -1.67693377128343 | 1.28538871987625 | 2.53903200202343  |
| C | 6.04824218164099  | 2.36466654956786 | -3.37996124292706 |
| H | 6.49826144828280  | 0.85606030796974 | -1.87845710622022 |
| H | 7.62285618330522  | 2.24606833269396 | -1.88116381044749 |
| H | 4.99473431114553  | 2.09622327851865 | -3.48771424041902 |
| H | 6.61674963728430  | 1.85110386169193 | -4.16250677921049 |
| H | 6.16102369744574  | 3.44074416365521 | -3.53188145655279 |
| H | 2.29319576438751  | 1.73910715309087 | 0.02880835084650  |
| H | 4.47375817804889  | 2.35683814210785 | 1.50872696832437  |

5.3.10  $4b^{Me}$

E = -3042.642963165599

|   |                   |                  |                   |
|---|-------------------|------------------|-------------------|
| C | 3.38047288779625  | 6.35397705985676 | 1.45453965783342  |
| C | 2.01639758902056  | 6.35197423818025 | 1.41860765153566  |
| P | 1.09591051562254  | 5.20537547188247 | 0.32238741571121  |
| C | 2.14714563793890  | 5.43001760440287 | -1.14308500179019 |
| C | 3.51016071256338  | 5.41460405566352 | -1.09769825400742 |
| P | 4.40886439975931  | 5.22116943384419 | 0.48537325740294  |
| N | 4.10999228865353  | 5.49188860889714 | -2.34883698287649 |
| C | 3.23899043940735  | 5.57043427742899 | -3.41007013047067 |
| S | 1.60068023204958  | 5.54323078708276 | -2.78912093029596 |
| N | 1.43860374368193  | 7.20727827216040 | 2.34674100711684  |
| C | 2.32644906335386  | 7.90171085540602 | 3.13613476561814  |
| S | 3.95345981727162  | 7.45438487282920 | 2.67261905907135  |
| S | 1.93530811800207  | 9.00003471981079 | 4.32783066930898  |
| S | 3.65436884347322  | 5.68833803006161 | -5.02012950813185 |
| C | 5.56005667224438  | 5.50627732304840 | -2.57453266727253 |
| H | 5.83525136325446  | 4.64917081100789 | -3.19261812579511 |
| H | 6.05559316607553  | 5.45374127221592 | -1.60515214568163 |
| H | 5.83144220525145  | 6.42761198314504 | -3.09421208486629 |
| C | -0.00715563050300 | 7.39765376453290 | 2.51055666059326  |
| H | -0.29963512062447 | 7.08611355807992 | 3.51562757712206  |
| H | -0.51565416536547 | 6.79270419817765 | 1.75996106652524  |
| H | -0.24438614967363 | 8.45513510862198 | 2.37783260998136  |
| C | 3.48515210718233  | 3.60112982962662 | 0.96426978986279  |
| C | 1.94579390311925  | 3.64955599843892 | 0.96190975251041  |
| H | 1.55664536467097  | 2.83750493449757 | 0.34090455409427  |
| C | 4.09724418013657  | 3.15980344472953 | 2.28143788617300  |
| O | 3.47324621962431  | 3.72059620907144 | 3.33374730524490  |
| C | 4.02202484675966  | 3.42345972417763 | 4.66420453843306  |
| O | 5.06002960847968  | 2.41634197173527 | 2.36311218045313  |
| H | 1.55715173520672  | 3.51956074626152 | 1.97463154626107  |
| C | 5.12713058109501  | 4.40211608945020 | 5.01635541086384  |
| H | 4.37349150438351  | 2.38998185161445 | 4.66086460450723  |
| H | 3.16043334617675  | 3.52412762196882 | 5.32573367861232  |
| H | 5.96736918085626  | 4.30883029229652 | 4.32269185715858  |
| H | 5.48658163749043  | 4.18487312750059 | 6.02794975945473  |
| H | 4.75628644365261  | 5.43061199029794 | 4.99236449858138  |
| H | 3.84786771191250  | 2.90105686199618 | 0.20780007115695  |

E = -3042.643259272092

|   |                  |                  |                   |
|---|------------------|------------------|-------------------|
| C | 3.38739843135142 | 6.37785982897746 | 1.48271772474902  |
| C | 2.02947891229315 | 6.24811014473729 | 1.46848424290800  |
| P | 1.21643132247083 | 4.89654042850740 | 0.53683480627002  |
| C | 2.21490837531165 | 5.05488732437045 | -0.97047232032600 |
| C | 3.57265024337137 | 5.17963216504643 | -0.95845434575826 |
| P | 4.51002252582343 | 5.25823167097633 | 0.61043885477370  |
| N | 4.15063677953981 | 5.08122087045820 | -2.21773664214908 |
| C | 3.27074479459978 | 4.85565670452717 | -3.24891765122532 |
| S | 1.64856198944419 | 4.79169174703574 | -2.59176376808303 |
| N | 1.37675724439079 | 7.17677075683239 | 2.26696117933579  |
| C | 2.19844604657948 | 8.05740328162270 | 2.93265311777741  |



|   |                   |                   |                   |
|---|-------------------|-------------------|-------------------|
| S | 3.86088286163829  | 7.68828797323470  | 2.52398880400309  |
| S | 1.70933037756845  | 9.28434455164729  | 3.94841248177001  |
| S | 3.66325472595447  | 4.68370663005793  | -4.85988961861667 |
| C | 5.59065742749730  | 5.18685018128302  | -2.47952653885932 |
| H | 5.95870763102874  | 4.23607070036286  | -2.87155079927324 |
| H | 6.09023372243945  | 5.43071478745200  | -1.54218762703124 |
| H | 5.76024914247605  | 5.96990073648476  | -3.22084410395884 |
| C | -0.08124203007448 | 7.26685885846704  | 2.41270682680480  |
| H | -0.34714722350483 | 7.11317833243011  | 3.46044446691613  |
| H | -0.53251743879926 | 6.49795015368896  | 1.78595458802587  |
| H | -0.40962070885555 | 8.25976315801405  | 2.09891161504011  |
| C | 3.76741768381650  | 3.64734736837414  | 1.35197371550973  |
| C | 2.23312979804685  | 3.49951352910864  | 1.29620276207845  |
| H | 1.95404111405238  | 2.62271670883190  | 0.70625000944486  |
| C | 4.50707606828841  | 2.49691077252214  | 0.69411174916138  |
| O | 4.06249592540035  | 2.29728198300807  | -0.56177658073937 |
| C | 4.69111233944827  | 1.22314536295178  | -1.34234343325395 |
| O | 5.407021311158472 | 1.86578916150525  | 1.22069959108042  |
| H | 1.84043477257714  | 3.36705324652638  | 2.30798667169496  |
| C | 3.95141134140564  | -0.08400731592155 | -1.12858793983963 |
| H | 5.74011065263049  | 1.15887883953210  | -1.04782256830749 |
| H | 4.61062268787153  | 1.57397309642106  | -2.37247443215597 |
| H | 4.03141296468366  | -0.41236179843069 | -0.08846991317200 |
| H | 4.39200738143686  | -0.85405538940118 | -1.77055241002752 |
| H | 2.89471665198235  | 0.02280485147239  | -1.39137859915994 |
| H | 4.10644257873033  | 3.68863277998529  | 2.38914337999309  |

### 5.3.11 $4c^{Me}$

E = -2932.531129860856

|   |                   |                  |                   |
|---|-------------------|------------------|-------------------|
| C | 3.69104506965233  | 6.81172943839874 | 1.21069067870489  |
| C | 2.36009164149645  | 6.93811252525257 | 0.94340475216826  |
| P | 1.60213109110284  | 6.10887571664334 | -0.50781782416404 |
| C | 2.90916760900694  | 6.55764224996028 | -1.68943436498547 |
| C | 4.23754552752792  | 6.41520484127878 | -1.41757123427232 |
| P | 4.81511330045657  | 5.79189395518400 | 0.20784193835138  |
| N | 5.05841550868320  | 6.71609078329270 | -2.49984890121976 |
| C | 4.40183109024995  | 7.08518040724029 | -3.64892027239109 |
| S | 2.67845101949441  | 7.06102638865092 | -3.33711020649075 |
| N | 1.67536022514761  | 7.69960135563725 | 1.88396807396841  |
| C | 2.44356432821455  | 8.18735217671279 | 2.91363460800945  |
| S | 4.09609029335419  | 7.65957205834170 | 2.67318961261680  |
| S | 1.91114125650499  | 9.13465700345923 | 4.17974754704652  |
| S | 5.11190485595883  | 7.50447102186886 | -5.09869214705606 |
| C | 6.52439420448956  | 6.66687308760162 | -2.46574932255164 |
| H | 6.87886585134936  | 5.95371515419573 | -3.21301489017114 |
| H | 6.83004525940939  | 6.35933544670411 | -1.46561459457480 |
| H | 6.92097264730440  | 7.65705999824933 | -2.69978239913977 |
| C | 0.24020977190832  | 8.00050726963027 | 1.82073874217812  |
| H | -0.24953511032442 | 7.60270500232978 | 2.71195392463976  |
| H | -0.16395630169773 | 7.53601356158659 | 0.92144768751878  |
| H | 0.10333072164660  | 9.08332762055818 | 1.78800035508373  |
| C | 3.73444896354365  | 4.23181570520277 | 0.30010155615033  |

|   |                  |                  |                   |
|---|------------------|------------------|-------------------|
| C | 2.27096773230824 | 4.38830413831913 | -0.15904334814473 |
| H | 2.10915230777720 | 3.85934811028208 | -1.10453620214610 |
| C | 4.43383611222431 | 3.04050190392332 | -0.38740888316655 |
| C | 4.77263031165051 | 3.27064280343920 | -1.86433477919169 |
| C | 5.26621594079493 | 2.00851062448689 | -2.58808123595418 |
| H | 3.73477634777058 | 4.05349064134308 | 1.38129525795914  |
| H | 1.59870484359366 | 3.94541482904349 | 0.58243547110244  |
| C | 4.17525851509745 | 0.94852913208754 | -2.78097698631584 |
| H | 6.10870368158367 | 1.57828347933272 | -2.03014387659082 |
| H | 5.65745036095783 | 2.30179918621909 | -3.56996658982150 |
| H | 3.79367085901443 | 0.57949488371293 | -1.82280777216421 |
| H | 4.56114201249573 | 0.08792228973970 | -3.33763240372029 |
| H | 3.32911241904875 | 1.36259716028930 | -3.34249773346961 |
| H | 3.89956953152965 | 3.67100900236507 | -2.39795111103299 |
| H | 5.55535607114987 | 4.03797548881235 | -1.92664864478337 |
| H | 5.35558935367516 | 2.80671054498393 | 0.15879660729572  |
| H | 3.77228477484810 | 2.17196301364030 | -0.28135108927503 |

E = -2932.530440734876

|   |                   |                  |                   |
|---|-------------------|------------------|-------------------|
| C | 3.80868027140768  | 6.94664955394053 | 1.08871709183471  |
| C | 2.44639949941691  | 6.90644706954460 | 1.07144382875729  |
| P | 1.53847092583337  | 5.72923713941286 | 0.00055020629302  |
| C | 2.55409928279305  | 5.96852092879057 | -1.48563324565080 |
| C | 3.91732302734651  | 6.00759858168890 | -1.46470059553293 |
| P | 4.84183445946396  | 5.81794020105592 | 0.10943756044221  |
| N | 4.48887015644613  | 6.11228355224328 | -2.72702313971167 |
| C | 3.59680515612918  | 6.14994839592948 | -3.77264137708286 |
| S | 1.97350172228034  | 6.05578404224613 | -3.12293233811454 |
| N | 1.85494642964571  | 7.80157569138354 | 1.95640365010296  |
| C | 2.73150208403935  | 8.56283697517673 | 2.69199082986309  |
| S | 4.36547136847437  | 8.12704363869612 | 2.23673205080452  |
| S | 2.32538411371354  | 9.71948291778181 | 3.82359158179538  |
| S | 3.97967602968182  | 6.28047274440901 | -5.39068047091678 |
| C | 5.93244894636970  | 6.19382272416410 | -2.97952757181332 |
| H | 6.23810482497640  | 5.34463944717350 | -3.59425071028299 |
| H | 6.44570322820839  | 6.17590750241818 | -2.01827778125092 |
| H | 6.14881781387067  | 7.12108339800764 | -3.51393541540818 |
| C | 0.40617449413601  | 7.96550739153214 | 2.12440385001117  |
| H | 0.13147105206727  | 7.70958927928513 | 3.14990138638727  |
| H | -0.09301223125895 | 7.30305294240040 | 1.41733315271889  |
| H | 0.14050781285321  | 9.00640512496880 | 1.92950372745198  |
| C | 3.97742020278980  | 4.22900296591073 | 0.61980426064101  |
| C | 2.43319373125233  | 4.16937630175060 | 0.61836407767774  |
| C | 1.93524568993175  | 2.95472414894416 | -0.19067377994727 |
| C | 0.42914585533007  | 2.69489729235272 | -0.09592441553704 |
| C | 0.00117261623744  | 1.43123522568092 | -0.85078839212462 |
| H | 2.08072614522270  | 4.08254191690700 | 1.65269238779475  |
| C | -1.50257523053147 | 1.16072797316192 | -0.73969496412405 |
| H | 0.56149578775289  | 0.57085454508546 | -0.46065080650927 |
| H | 0.28064725104562  | 1.53309195260177 | -1.90803859935636 |
| H | -1.79883707806956 | 1.02822633698628 | 0.30767760886522  |
| H | -1.78573755489720 | 0.25570712058539 | -1.28797743992900 |
| H | -2.08099433249547 | 1.99807251796073 | -1.14777130420610 |

|   |                   |                  |                   |
|---|-------------------|------------------|-------------------|
| H | 0.14417108221937  | 2.60546086196514 | 0.96187988195218  |
| H | -0.12457179473570 | 3.55583991630048 | -0.49401600926869 |
| H | 2.23176463759025  | 3.08420290268776 | -1.24115669278352 |
| H | 2.47730317766514  | 2.07231659771094 | 0.17446283008201  |
| H | 4.36434418314609  | 4.00764729021549 | 1.61923433597748  |
| H | 4.37989516265132  | 3.47219489094318 | -0.06234924990197 |

### 5.3.12 $4d^{Me}$

E = -2775.003499378858

|   |                   |                  |                   |
|---|-------------------|------------------|-------------------|
| C | 3.70752092956405  | 6.75456885362109 | 1.11898728420333  |
| C | 2.36339283767822  | 6.90299127836374 | 0.94312089422140  |
| P | 1.45603912876338  | 5.91151154047716 | -0.30689359088156 |
| C | 2.66221002333240  | 6.13448882589756 | -1.64809010194773 |
| C | 4.00774058328472  | 5.99533423120754 | -1.47531695451624 |
| P | 4.71375626254168  | 5.57760785812831 | 0.16658058119108  |
| N | 4.73527952104968  | 6.13669084919575 | -2.65106749593208 |
| C | 3.98635661982707  | 6.38785177186046 | -3.77623838824471 |
| S | 2.29711493765042  | 6.44610780910886 | -3.31941260019363 |
| N | 1.78432108165687  | 7.80344168712403 | 1.82964924299168  |
| C | 2.65148666481946  | 8.38298497542910 | 2.72524223077663  |
| S | 4.26040679863965  | 7.76080463423060 | 2.42477286568694  |
| S | 2.25711552800960  | 9.50369023488514 | 3.89622895548495  |
| S | 4.57358511438287  | 6.61458053993767 | -5.32106199704885 |
| C | 6.19774822303069  | 6.04772246215063 | -2.73709805165329 |
| H | 6.46792719147886  | 5.23787899345052 | -3.41779119116318 |
| H | 6.58466929666068  | 5.85366088550124 | -1.73686778623775 |
| H | 6.59116179608603  | 6.98979045255412 | -3.12460403084727 |
| C | 0.35983785579343  | 8.15714731188034 | 1.83951190917607  |
| H | -0.07134363635536 | 7.88605606805419 | 2.80540363328077  |
| H | -0.13027509889111 | 7.61062797818497 | 1.03397515502764  |
| H | 0.25905838055428  | 9.23403781510427 | 1.68991210251947  |
| C | 3.61972067525546  | 4.07253023624888 | 0.45273700807850  |
| C | 2.09731002235383  | 4.24418237414951 | 0.28893748154733  |
| H | 1.70675233148457  | 3.52329778002614 | -0.43528262597484 |
| H | 1.58409604869855  | 4.07076757015613 | 1.23936146784699  |
| H | 3.86083689348626  | 3.74486656136369 | 1.46830481588235  |
| H | 3.99958210196374  | 3.31505369590835 | -0.23911258927399 |

### 5.3.13 $4e^{Me}$

E = -2931.324999179873

|   |                  |                  |                   |
|---|------------------|------------------|-------------------|
| C | 3.69776124308760 | 6.67217923035932 | 1.14281167117446  |
| C | 2.36509324531606 | 6.86643723924779 | 0.92872872628271  |
| P | 1.48578877429042 | 5.97145324472558 | -0.40587463351198 |
| C | 2.73551719489562 | 6.24725480359048 | -1.69461380793065 |
| C | 4.07411750178782 | 6.08640790679978 | -1.48558014246667 |
| P | 4.71291001645732 | 5.54635782724558 | 0.14684062511909  |
| N | 4.83877923017838 | 6.25965363030806 | -2.63305814128523 |
| C | 4.12796896939669 | 6.55638699463280 | -3.77220287397109 |
| S | 2.42648532699591 | 6.62216391854105 | -3.36469654867503 |
| N | 1.77274833962082 | 7.71612920788222 | 1.85567813676760  |
| C | 2.61734952012236 | 8.20841565495381 | 2.82205733972167  |

|   |                   |                  |                   |
|---|-------------------|------------------|-------------------|
| S | 4.22258449376866  | 7.57030298999073 | 2.53700114832787  |
| S | 2.20197188950649  | 9.25062624003073 | 4.05690795006292  |
| S | 4.76521434886421  | 6.82494584717761 | -5.28992199581012 |
| C | 6.30205633995217  | 6.15310842412999 | -2.67605208046567 |
| H | 6.58439994602414  | 5.33395879756796 | -3.34085870709923 |
| H | 6.65682827054246  | 5.96370495088785 | -1.66308001045841 |
| H | 6.71555661604188  | 7.08757888205081 | -3.06035410173493 |
| C | 0.35635086988859  | 8.10043781262266 | 1.83969924126218  |
| H | -0.12120073970284 | 7.75543836285031 | 2.75921878506739  |
| H | -0.10952359791499 | 7.63808734264370 | 0.96960406938957  |
| H | 0.28342524499118  | 9.18829547076604 | 1.78258168884253  |
| C | 3.59728068821542  | 4.01964633401105 | 0.24917802358584  |
| C | 2.06511675938862  | 4.24649415839192 | 0.12208464661505  |
| C | 1.40932074866748  | 3.22186711484190 | -0.82614973599909 |
| C | 4.11026347882344  | 3.01101088229525 | -0.79475303377013 |
| H | 3.80877142710101  | 3.63249998244364 | 1.25297974464929  |
| H | 1.61558729210392  | 4.13429095522070 | 1.11532517204836  |
| C | 3.40866422101839  | 1.65010714870649 | -0.65076759491874 |
| H | 5.19457495837583  | 2.88832563938337 | -0.69336353520458 |
| H | 3.92999014231165  | 3.41476488169882 | -1.79806615738137 |
| C | 1.87648176840227  | 1.80529150793435 | -0.46969065520045 |
| H | 3.83373638801609  | 1.11437186068761 | 0.20505138456116  |
| H | 3.62680450585425  | 1.05191616213139 | -1.54213082922785 |
| H | 1.59796929281442  | 1.60476381118134 | 0.57195357940125  |
| H | 1.34427654546581  | 1.07367107170216 | -1.08632768009385 |
| H | 1.66536491531487  | 3.45252152524261 | -1.86819170893061 |
| H | 0.32078158241556  | 3.30210730092251 | -0.73956086044330 |

### 5.3.14 $4f_{Me}$

E = -2932.530912773049

|   |                   |                  |                   |
|---|-------------------|------------------|-------------------|
| C | 3.72160487045439  | 6.61192284898036 | 1.25221616177810  |
| C | 2.40374081225230  | 6.83356200864951 | 0.98121251684486  |
| P | 1.61119053837933  | 6.12440813061026 | -0.51537382028919 |
| C | 2.96121714823806  | 6.54738600556668 | -1.65643253611567 |
| C | 4.26774893867409  | 6.28174256821402 | -1.37611870128295 |
| P | 4.77707616912530  | 5.54575919013909 | 0.22366539343780  |
| N | 5.13230591563955  | 6.60905854958377 | -2.41713889814768 |
| C | 4.52910774056177  | 7.11962374529251 | -3.54080809544983 |
| S | 2.80195362004995  | 7.19907195253441 | -3.25861969414235 |
| N | 1.75374761423430  | 7.57864518197680 | 1.95865481950218  |
| C | 2.53581319689476  | 7.95651127708672 | 3.02376985967923  |
| S | 4.15657511662793  | 7.34276922875249 | 2.76811899458205  |
| S | 2.04637953124376  | 8.86212345752949 | 4.33617601186608  |
| S | 5.29789312130248  | 7.60262424928306 | -4.94001302326639 |
| C | 6.59037278285144  | 6.45399584377275 | -2.36440885404077 |
| H | 6.90962661989874  | 5.76995262509171 | -3.15363327378354 |
| H | 6.85361112071157  | 6.05927475290633 | -1.38291508212472 |
| H | 7.05833381594760  | 7.42764027279755 | -2.52383351296496 |
| C | 0.34193617840459  | 7.97523984636804 | 1.89619658707312  |
| H | -0.18470399662110 | 7.56352474537437 | 2.75950677669024  |
| H | -0.07833165896283 | 7.58615302840414 | 0.96894311793287  |
| H | 0.27554227824620  | 9.06493210902866 | 1.92003255782368  |

|   |                  |                  |                   |
|---|------------------|------------------|-------------------|
| C | 3.58166479685894 | 4.04076574544735 | 0.26061632725858  |
| C | 2.16056355597707 | 4.34538028752523 | -0.26879627763696 |
| H | 2.01176294565581 | 3.90755445234751 | -1.26139271510992 |
| C | 4.21659074859824 | 2.88446075059862 | -0.55159888177870 |
| C | 4.56722437223476 | 3.19240629714192 | -2.00876907977552 |
| H | 1.42045660673065 | 3.89039476032154 | 0.39855904451150  |
| H | 5.12105813536515 | 2.54697060833452 | -0.03449020182480 |
| H | 3.50285941823426 | 2.05081241867187 | -0.51405765306031 |
| H | 4.86119272193888 | 2.27319541453069 | -2.52490199464259 |
| H | 5.41215032606679 | 3.88546978557943 | -2.07674913379698 |
| H | 3.72507611299783 | 3.63061023151324 | -2.55499434674561 |
| C | 3.45327819879251 | 3.61815763528843 | 1.75105327415681  |
| C | 4.75767474860455 | 3.44501871522006 | 2.53444670627827  |
| H | 2.89945871656658 | 2.66977646915786 | 1.75147643233496  |
| H | 2.81662673917726 | 4.34714490377050 | 2.26502418109851  |
| H | 5.43253193768872 | 2.72957522069495 | 2.05510190818162  |
| H | 4.53552438586161 | 3.07723905429833 | 3.54118071587892  |
| H | 5.29820781569621 | 4.39224249001521 | 2.64277934527004  |
